# Supplementary material for: Autoinductive conversion of α,α-diiodonitroalkanes to amides and esters catalysed by iodine byproducts under O2
Source: Royal Society of Chemistry journal article supplement (doi:10.1039/c8cc03191f), 2018-01-01

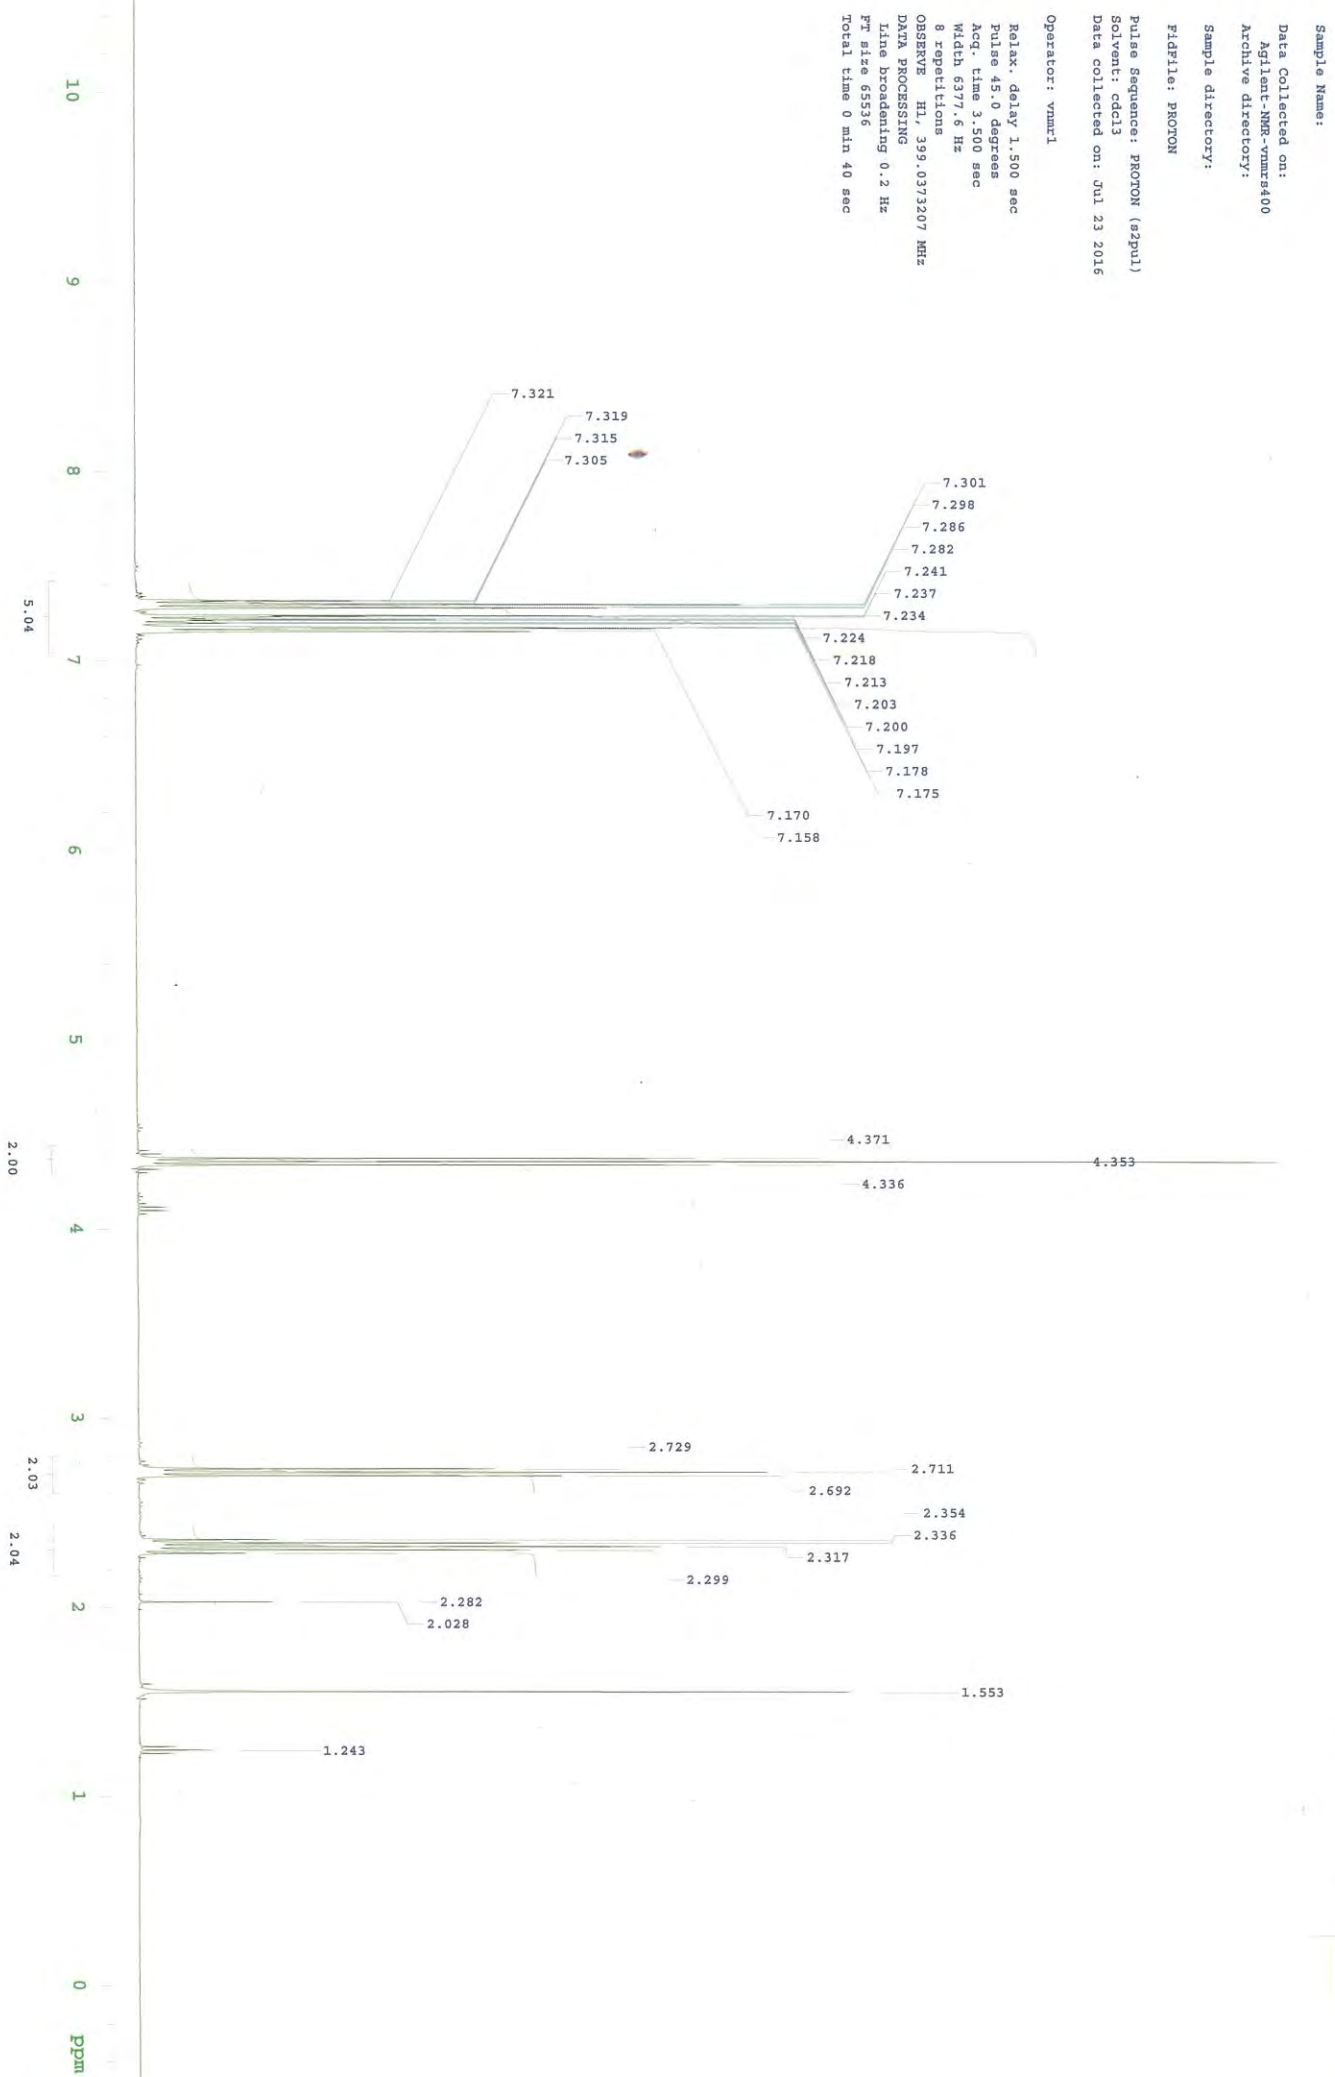

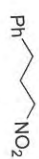

Sample Name:

Data Collected on:  
Agilent-NMR-vnmr5400  
Archive directory:

Sample directory:

FIDFile: CARBON

Pulse Sequence: CARBON (zgpg30)  
Solvent: cdcl3  
Data collected on: Jul 23 2016

Operator: vnmr1

Relax. delay 1.689 sec  
Pulse 45.0 degrees  
Acq. time 1.311 sec  
Width 25000.0 Hz  
64 repetitions  
OBSERVE C13, 100.380141 MHz  
DECOUPLE H1, 399.033159 MHz  
Power 43 dB  
continuously on  
WALTZ-16 modulated  
DATA PROCESSING  
line broadening 1.0 Hz  
FT size 65536  
Total time 51 min

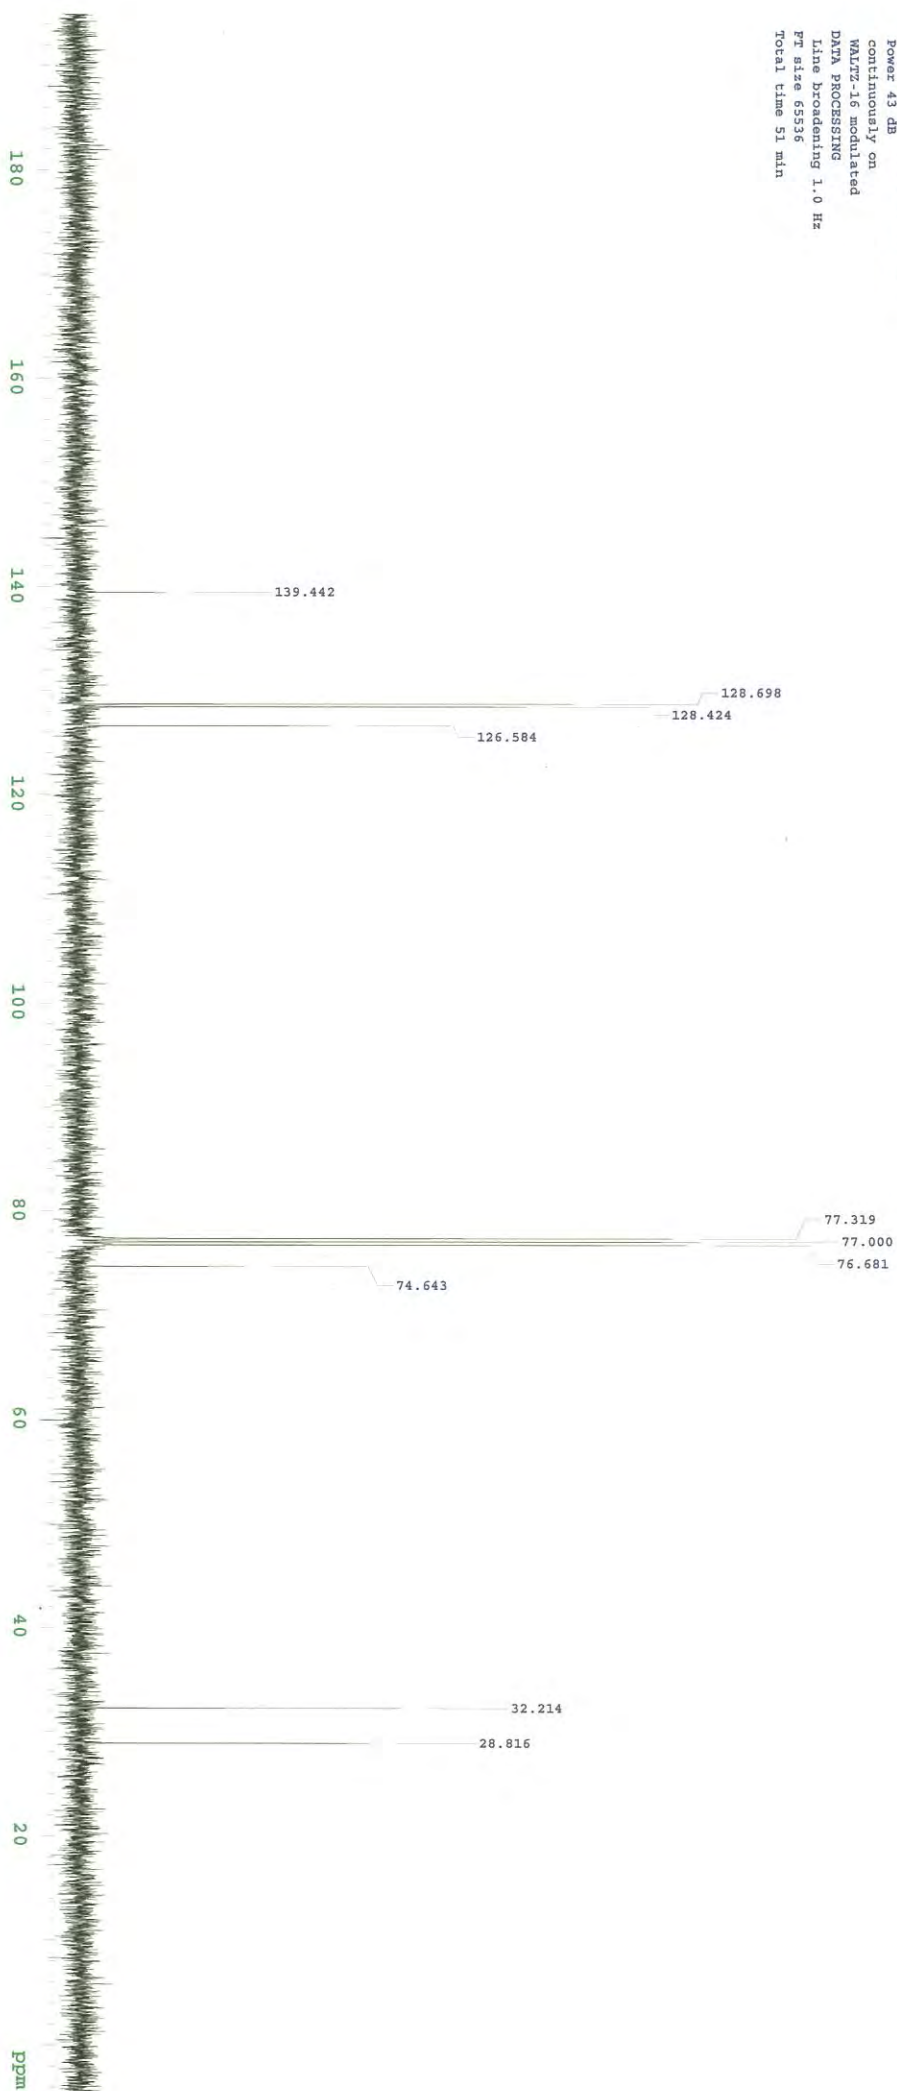

Sample Name:

Data Collected on:  
Agilent-NMR-vnmr400  
Archive directory:

Sample directory:

FidFile: 77-SM-difluoromethane-1H

Pulse Sequence: PROTON (zgpg30)  
Solvent: cdcl3  
Data collected on: Nov 23 2015

Operator: vnmr1

Relax. delay 1.500 sec  
Pulse 45.0 degrees  
Acq. time 3.500 sec  
Width 6377.6 Hz  
8 repetitions  
OBSERVE H1, 399.034316 MHz  
DATA PROCESSING  
Line broadening 0.2 Hz  
FT size 65536  
Total time 0 min 40 sec

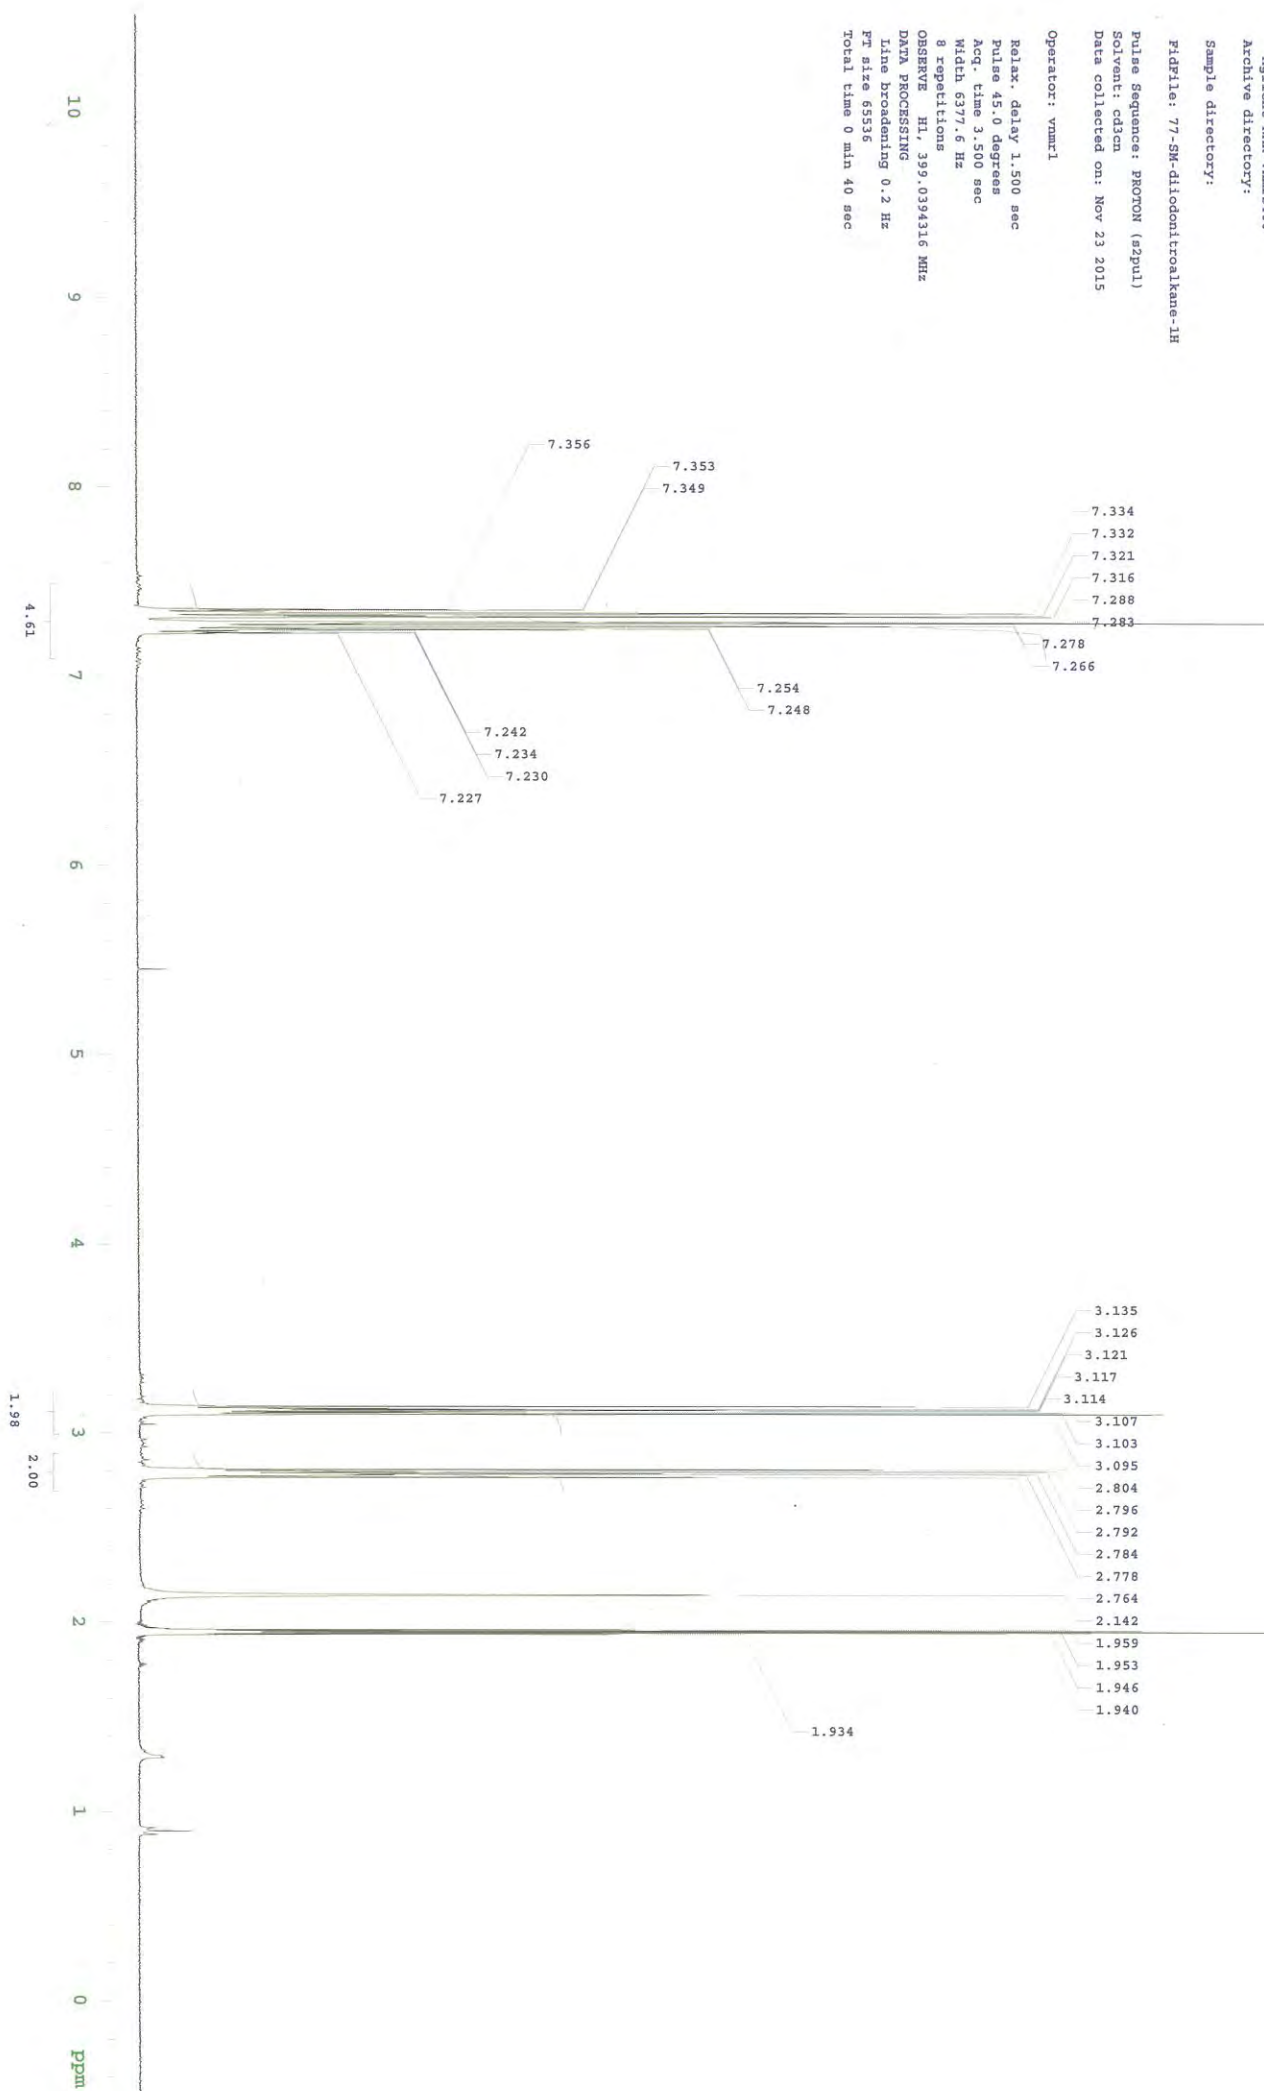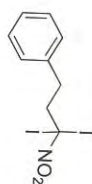

Sample Name:

Data Collected on:  
Agilent-NMR-vnmr400  
Archive directory:

Sample directory:

Fidfile: 77-SM-difodoniCroalkane-13C

Pulse Sequence: CARBON (a2pul)

Solvent: cdcl3

Data collected on: Nov 23 2015

Operator: vnmr1

Relax. delay 1.689 sec

Pulse 45.0 degrees

Acq. time 1.311 sec

Width 25000.0 Hz

832 repetitions

OBSERVE C13, 100.3380141 MHz

DECOUPLE H1, 399.0393159 MHz

Power 43 db

continuously on

WALTZ-16 modulated

DATA PROCESSING

Line broadening 1.0 Hz

FT size 65536

Total time 51 min

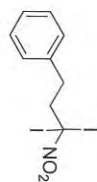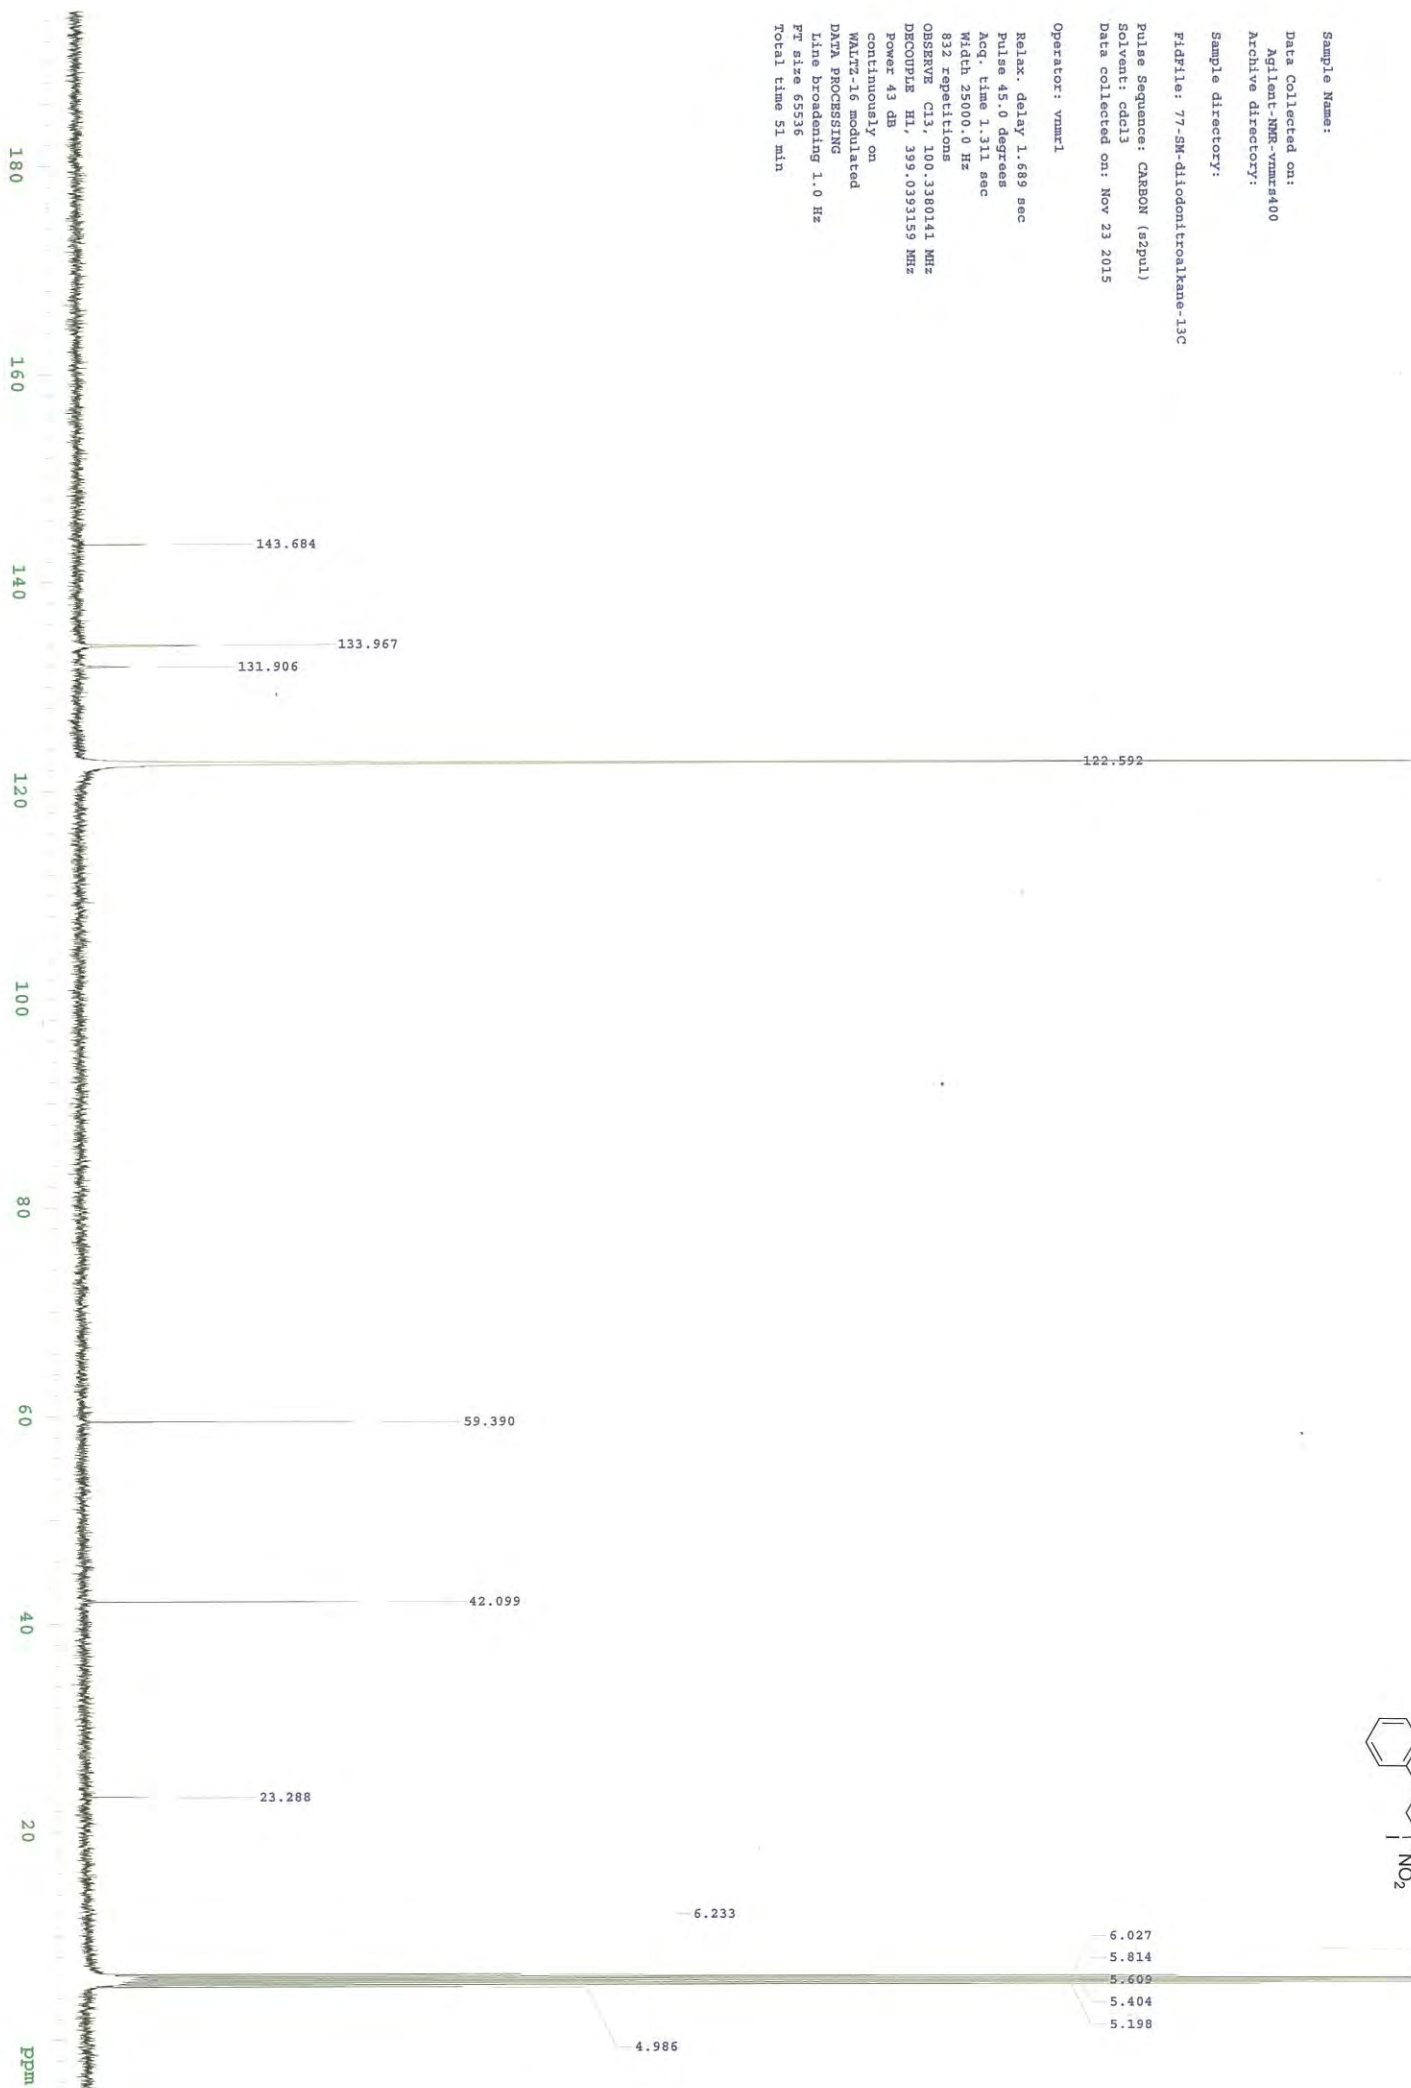

# STANDARD FLUORINE PARAMETERS

Sample Name:

Data Collected on:  
Agilent-NMR-vnmr400  
Archive directory:

Sample directory:

Fidfile: PROTON

Pulse Sequence: PROTON (a2pul1)  
Solvent: cdcl3  
Data collected on: Jul 24 2016

Operator: vnmr1

Relax. delay 1.500 sec  
Pulse 45.0 degrees  
Acq. time 3.500 sec  
Width 6377.6 Hz  
8 repetitions  
OBSERVE H1, 399.0373207 MHz  
DATA PROCESSING  
Line broadening 0.2 Hz  
FT size 65536  
Total time 0 min 40 sec

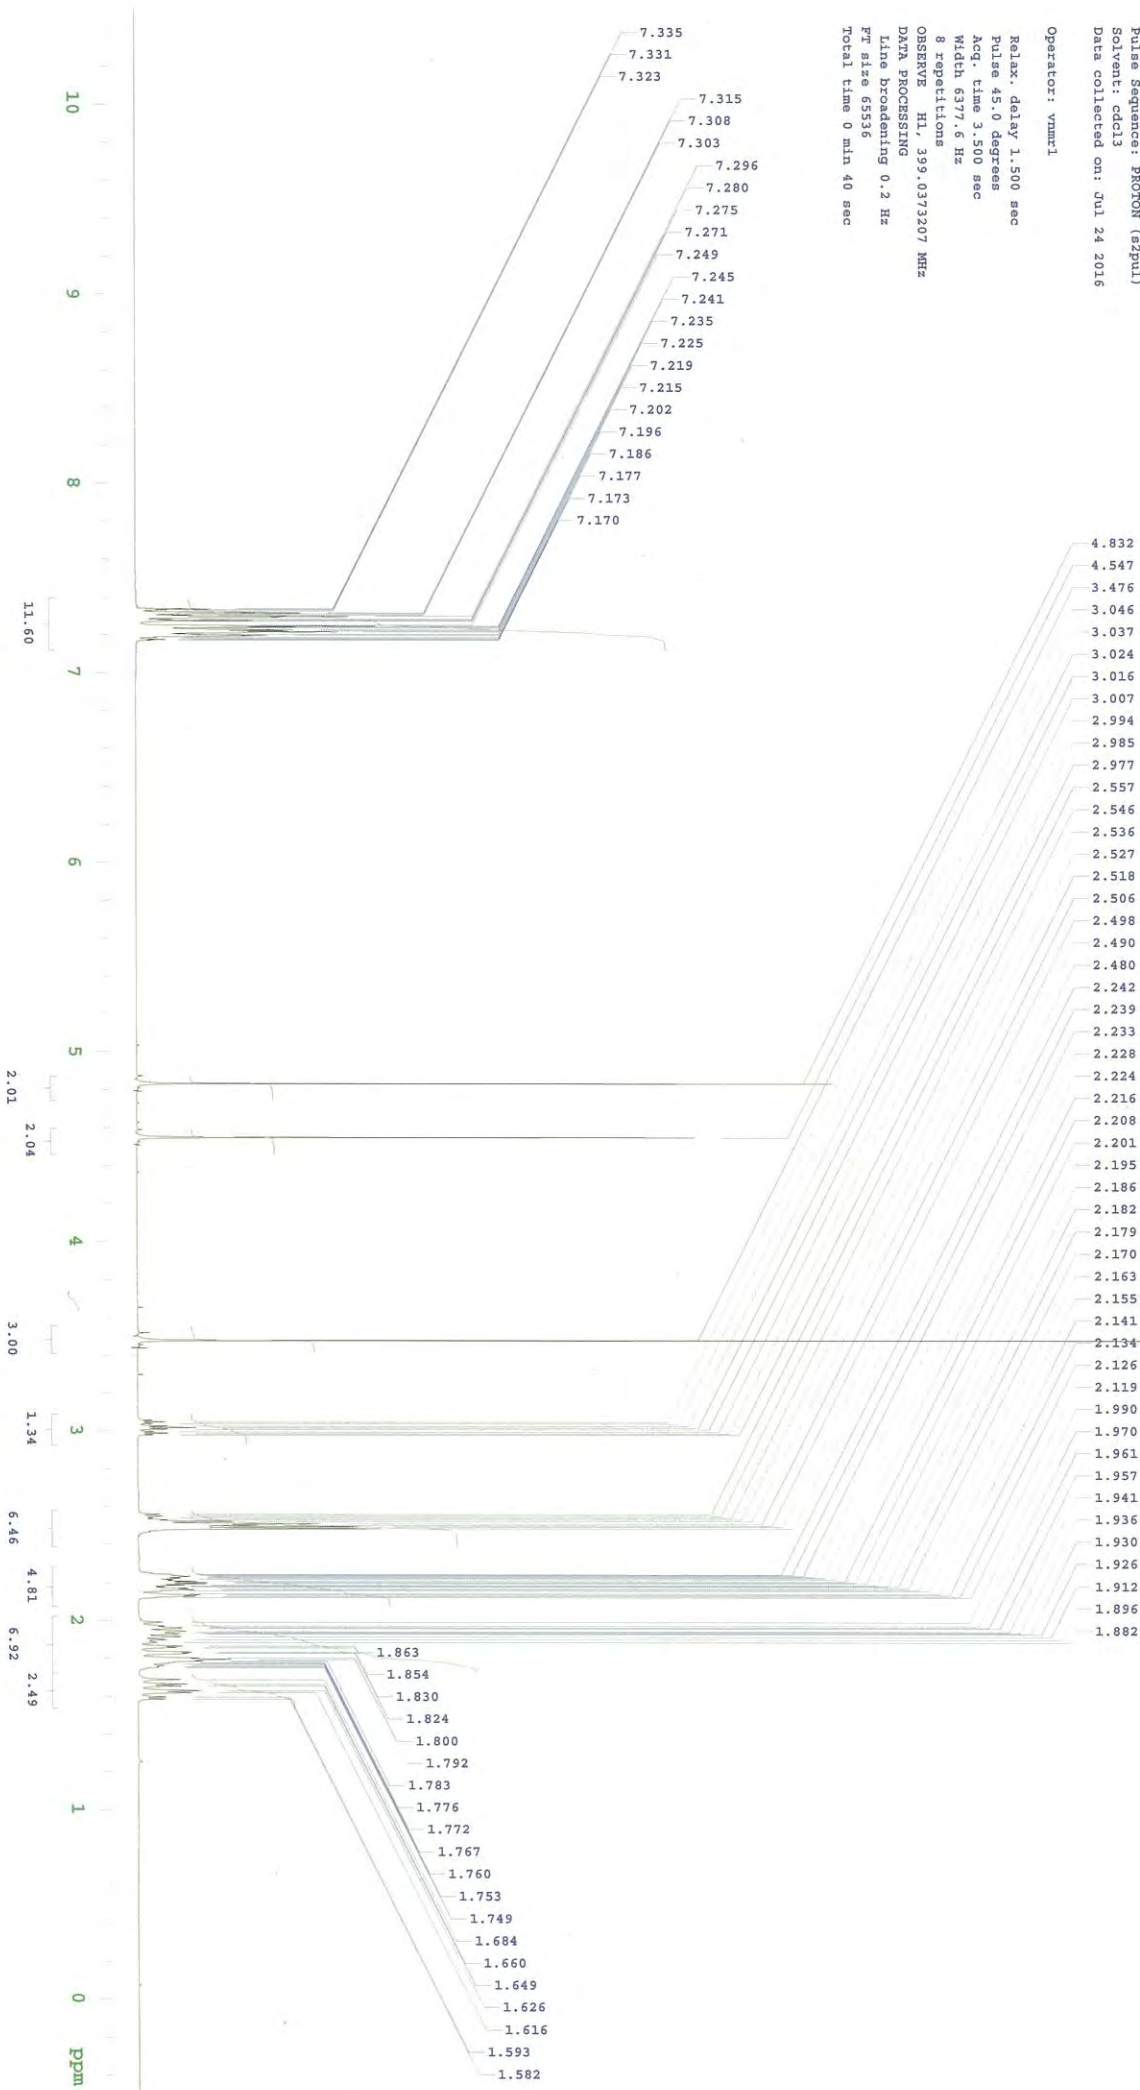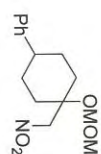

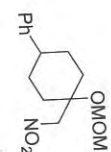

Sample Name:

Data Collected on:  
Agilent-NMR-vnmr400  
Archive directory:

Sample directory:

FidFile: CARBON

Pulse Sequence: CARBON (a2pul)  
Solvent: cdcl3  
Data collected on: Jul 24 2016

Operator: vnmr1

Relax. delay 1.689 sec  
Pulse 45.0 degrees  
Acq. time 1.311 sec  
Width 25000.0 Hz  
64 repetitions  
OBSERVE C13, 100.3380341 MHz  
DECOUPLE H1, 399.0393159 MHz  
Power 43 dB  
continuously on  
WALTZ-16 modulated  
DATA PROCESSING  
Line broadening 1.0 Hz  
FT size 65536  
Total time 51 min

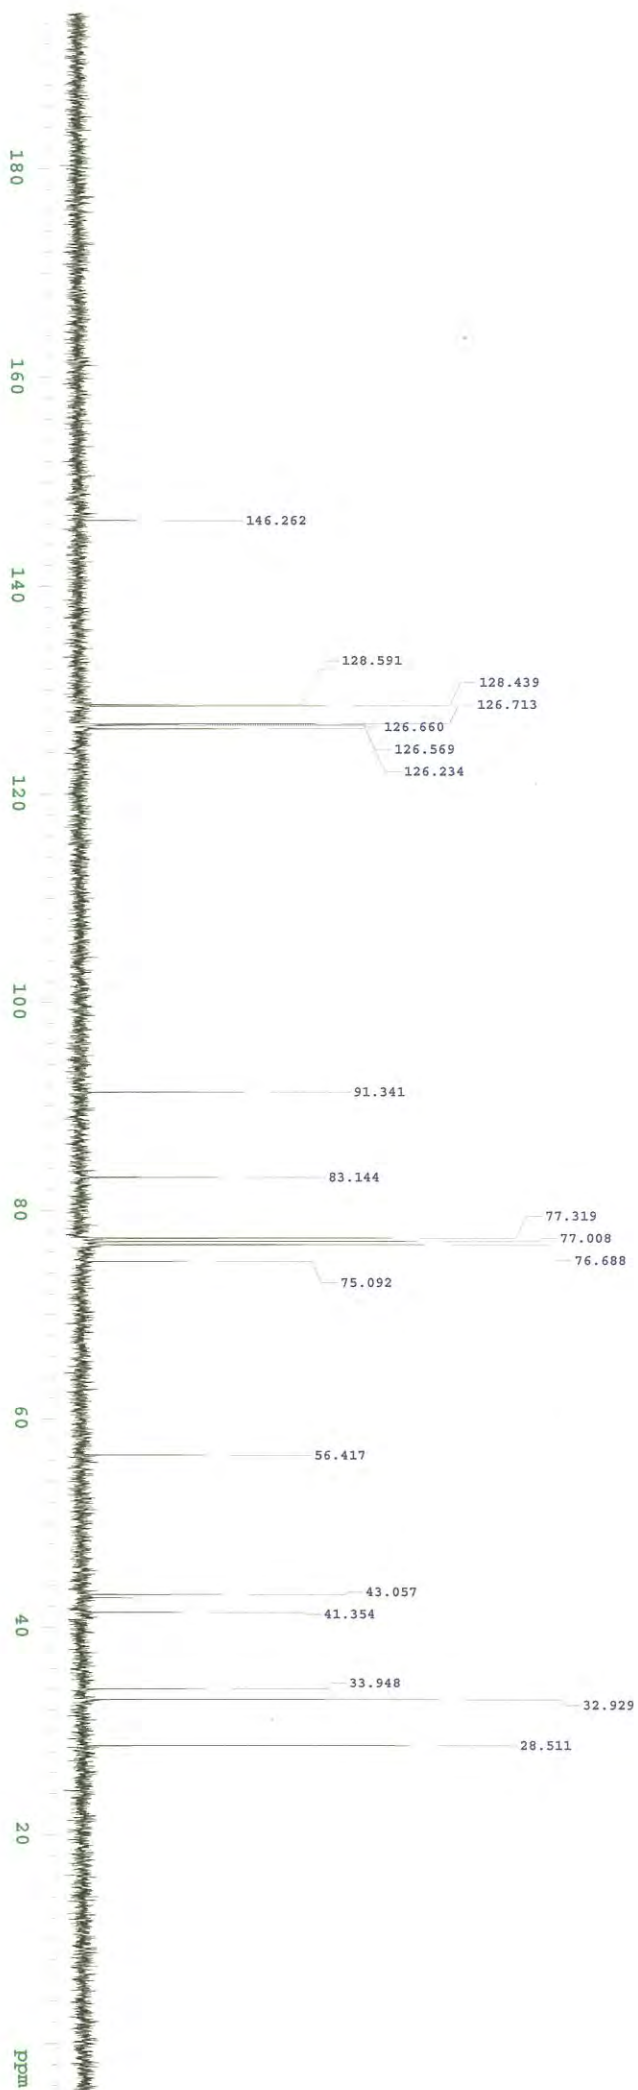



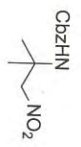

Sample Name:

Data Collected on:  
Agilent-NMR-vnmr400  
Archive directory:

Sample directory:

FidFile: PROTON

Pulse Sequence: PROTON (zgpg30)  
Solvent: cdcl3  
Data collected on: Jul 15 2016

Operator: vnmr1

Relax. delay 1.500 sec  
Pulse 45.0 degrees  
Acq. time 3.500 sec  
Width 6377.6 Hz  
8 repetitions  
OBSERVE H1, 399.0373207 MHz  
DATA PROCESSING  
Line broadening 0.2 Hz  
FT size 65536  
Total time 0 min 40 sec

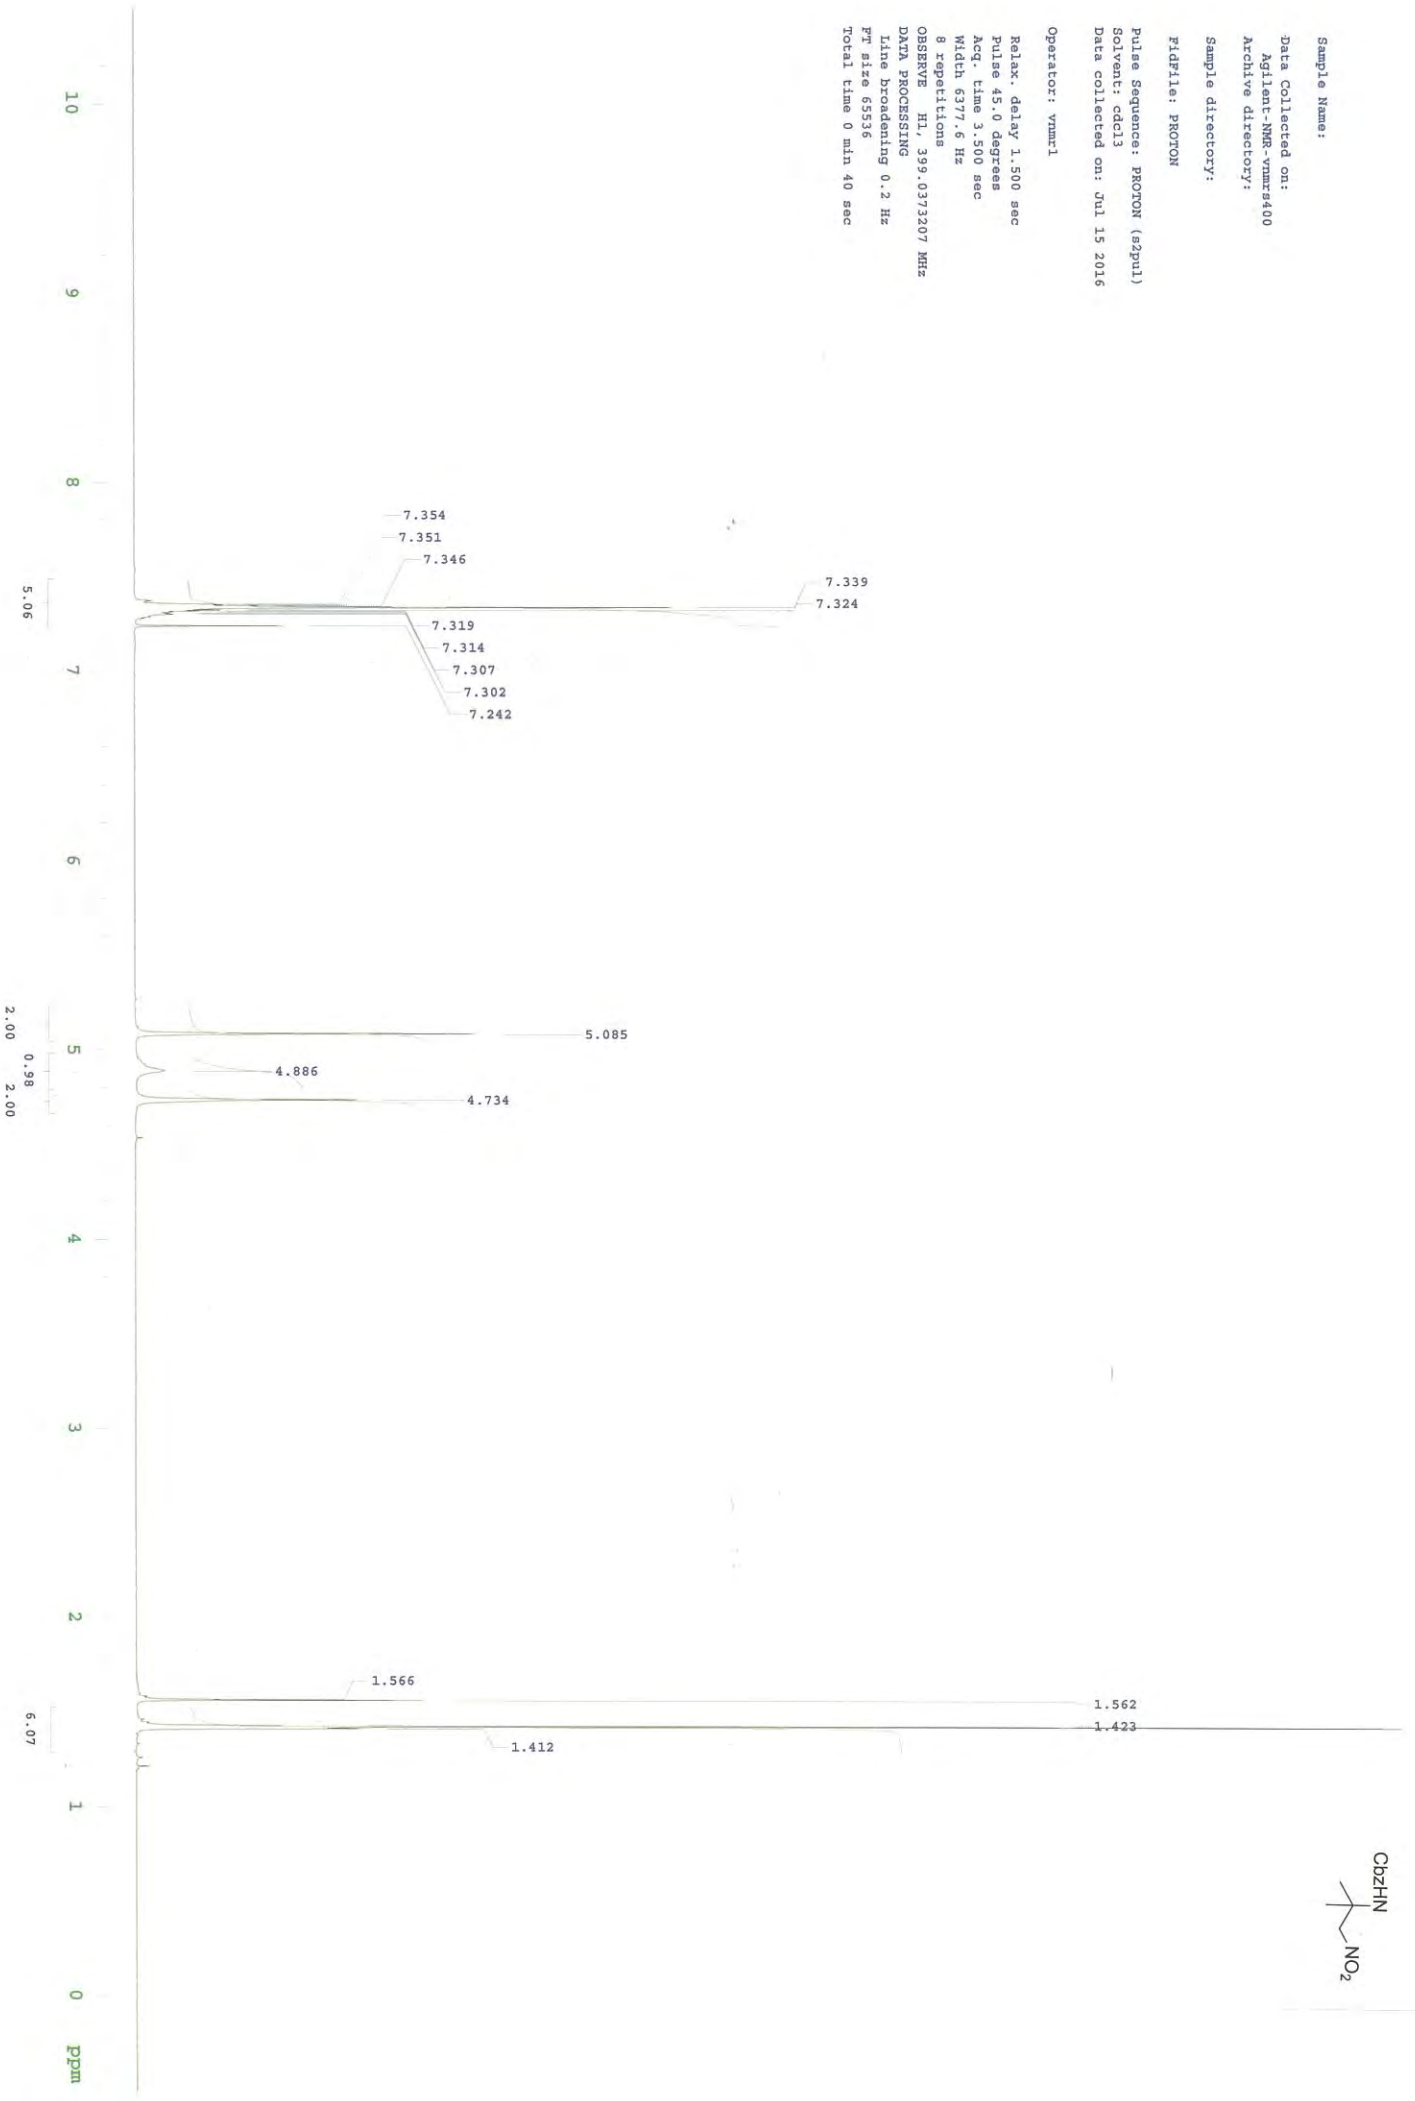

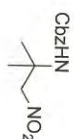

Sample Name:

Data Collected on:  
Agilent-NMR-Vnmr400  
Archive directory:

Sample directory:

F1dFile: CARBON

Pulse Sequence: CARBON (zgpg3)  
Solvent: cdcl3  
Data collected on: Jul 15 2016

Operator: vnmr1

Relax. delay 1.689 sec  
Pulse 45.0 degrees  
Acq. time 1.311 sec  
Width 25000.0 Hz  
192 repetitions  
OBSERVE C13, 100.3380141 MHz  
DECOUPLE H1, 399.0393159 MHz  
Power 43 dB  
continuously on  
WALTZ-16 modulated  
DATA PROCESSING  
Line broadening 1.0 Hz  
FT size 65536  
Total time 51 min

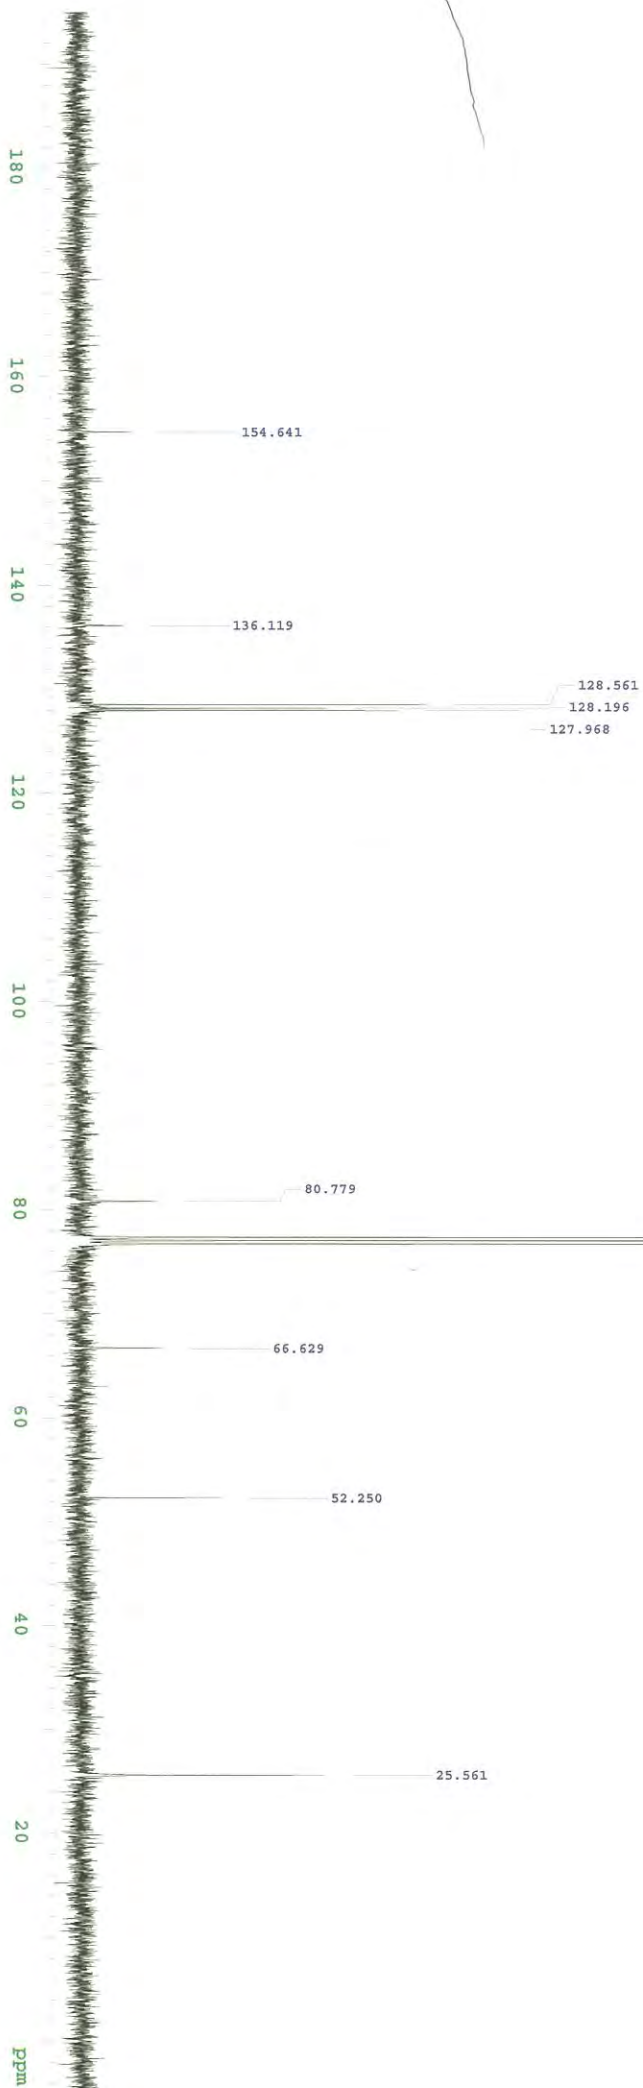



Sample Name:

Data Collected on:  
Agilent-NMR-vnmr400  
Archive directory:

Sample directory:

FIDFile: PROTON

Pulse Sequence: PROTON (a2pul1)  
Solvent: cdcl3  
Data collected on: Jul 19 2016

Operator: vnmr1

Relax. delay 1.500 sec  
Pulse 45.0 degrees  
Acq. time 3.500 sec  
Width 6377.6 Hz  
8 repetitions  
OBSERVE H1, 399.0373207 MHz  
DATA PROCESSING  
Line broadening 0.2 Hz  
FT size 65536  
Total time 0 min 40 sec

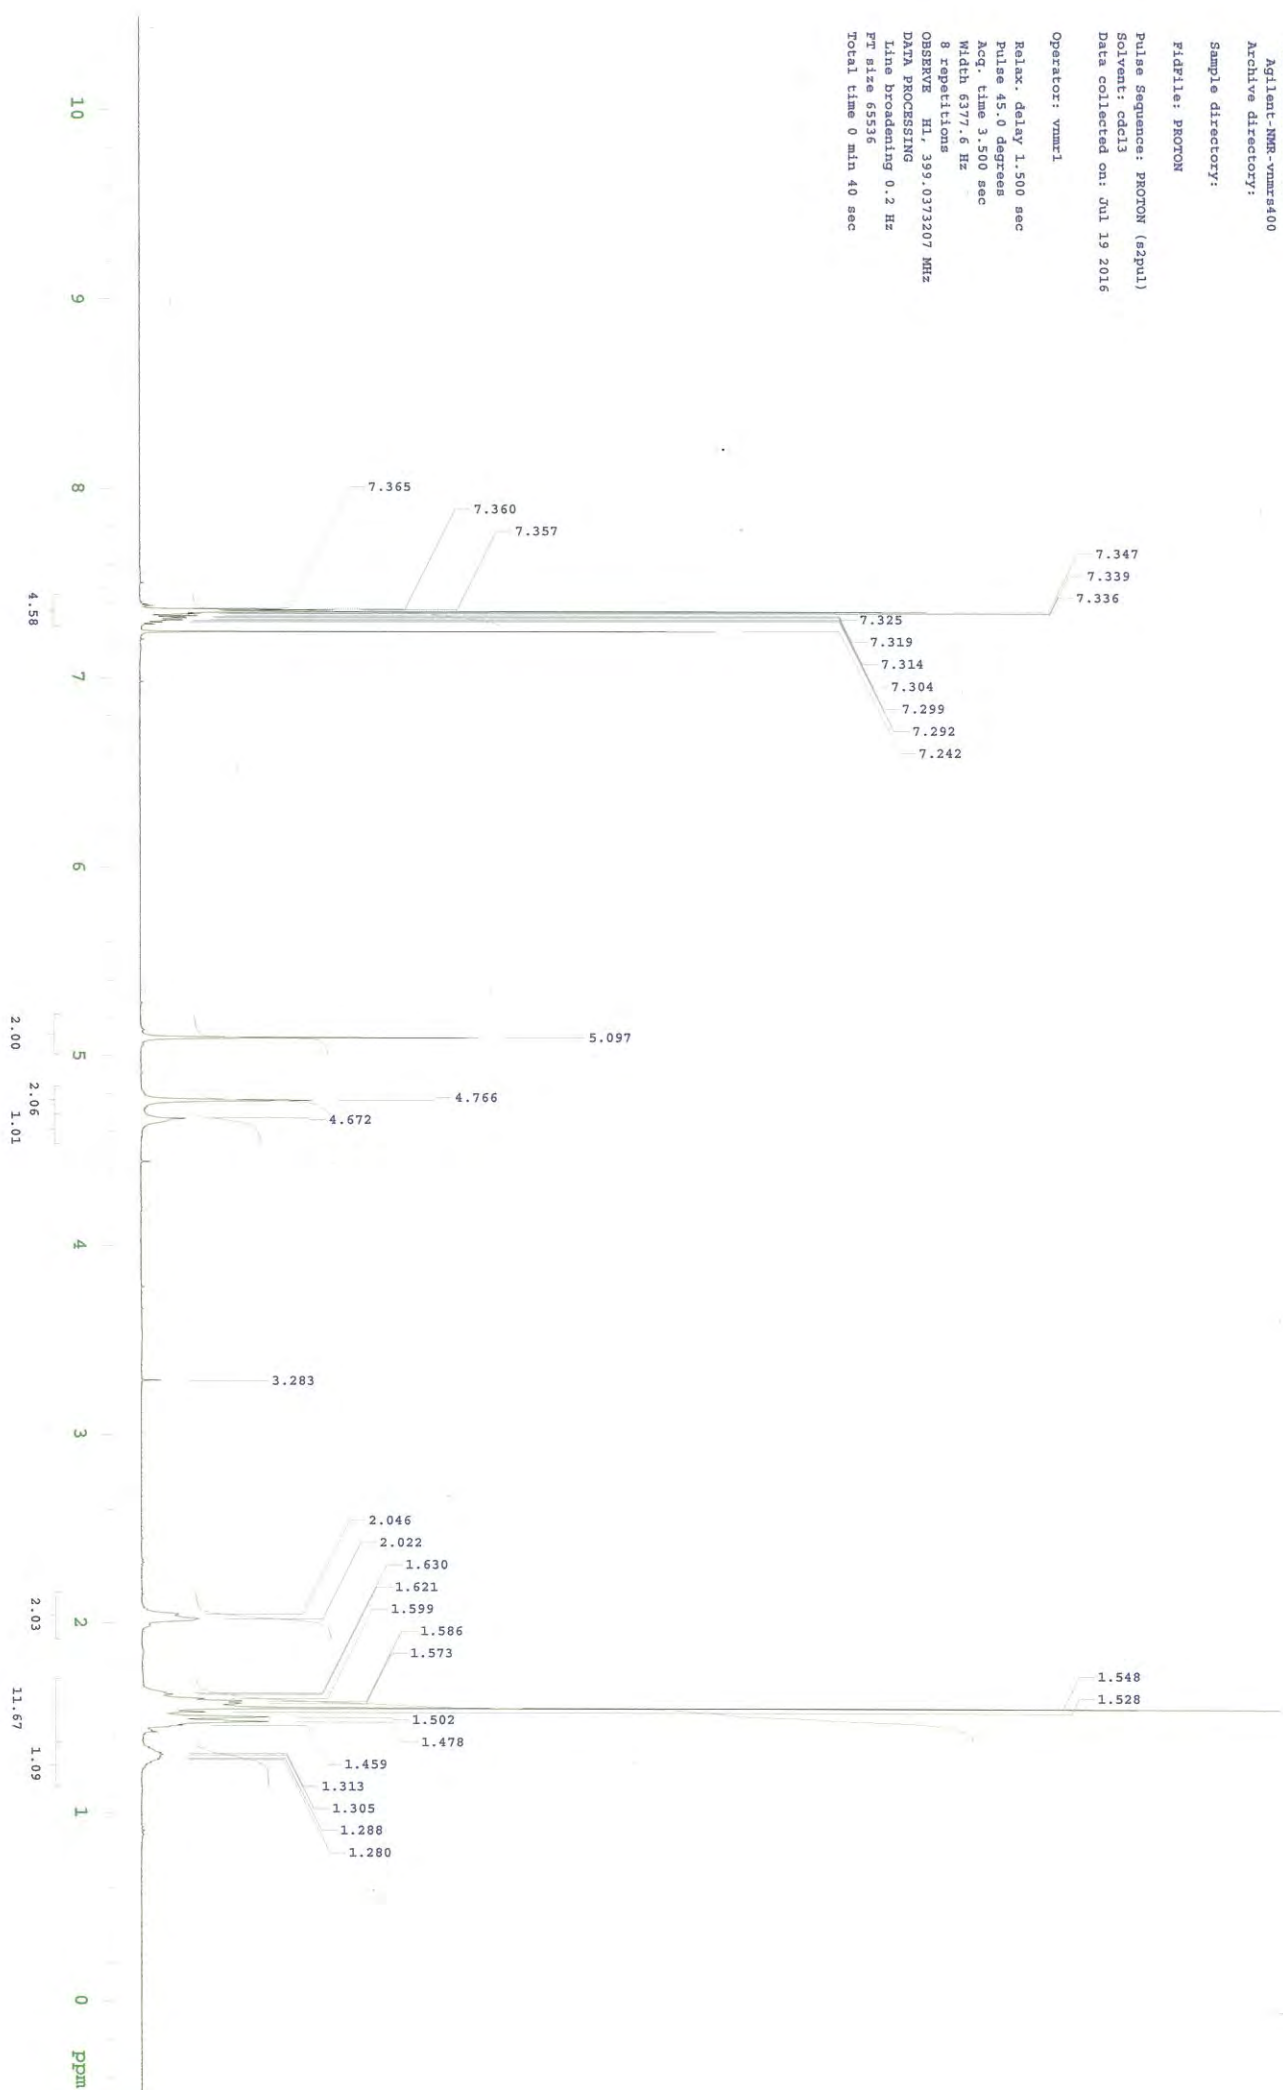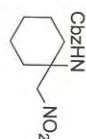

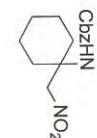

Sample Name:

Data Collected on:  
Agilent-NMR-vnmr400  
Archive directory:

Sample directory:

F1dFile: CARBON

Pulse Sequence: CARBON (zgpg3)  
Solvent: cdcl3  
Data collected on: Jul 16 2016

Operator: vnmr1

Relax. delay 1.689 sec  
Pulse 45.0 degrees  
Acq. time 1.311 sec  
Width 25000.0 Hz  
1024 repetitions  
OBSERVE C13, 100.3380141 MHz  
DECUPLE H1, 399.0393159 MHz  
Power 43 dB  
continuously on  
MAGZ-16 modulated  
DATA PROCESSING  
Line broadening 1.0 Hz  
FT size 65536  
Total time 51 min

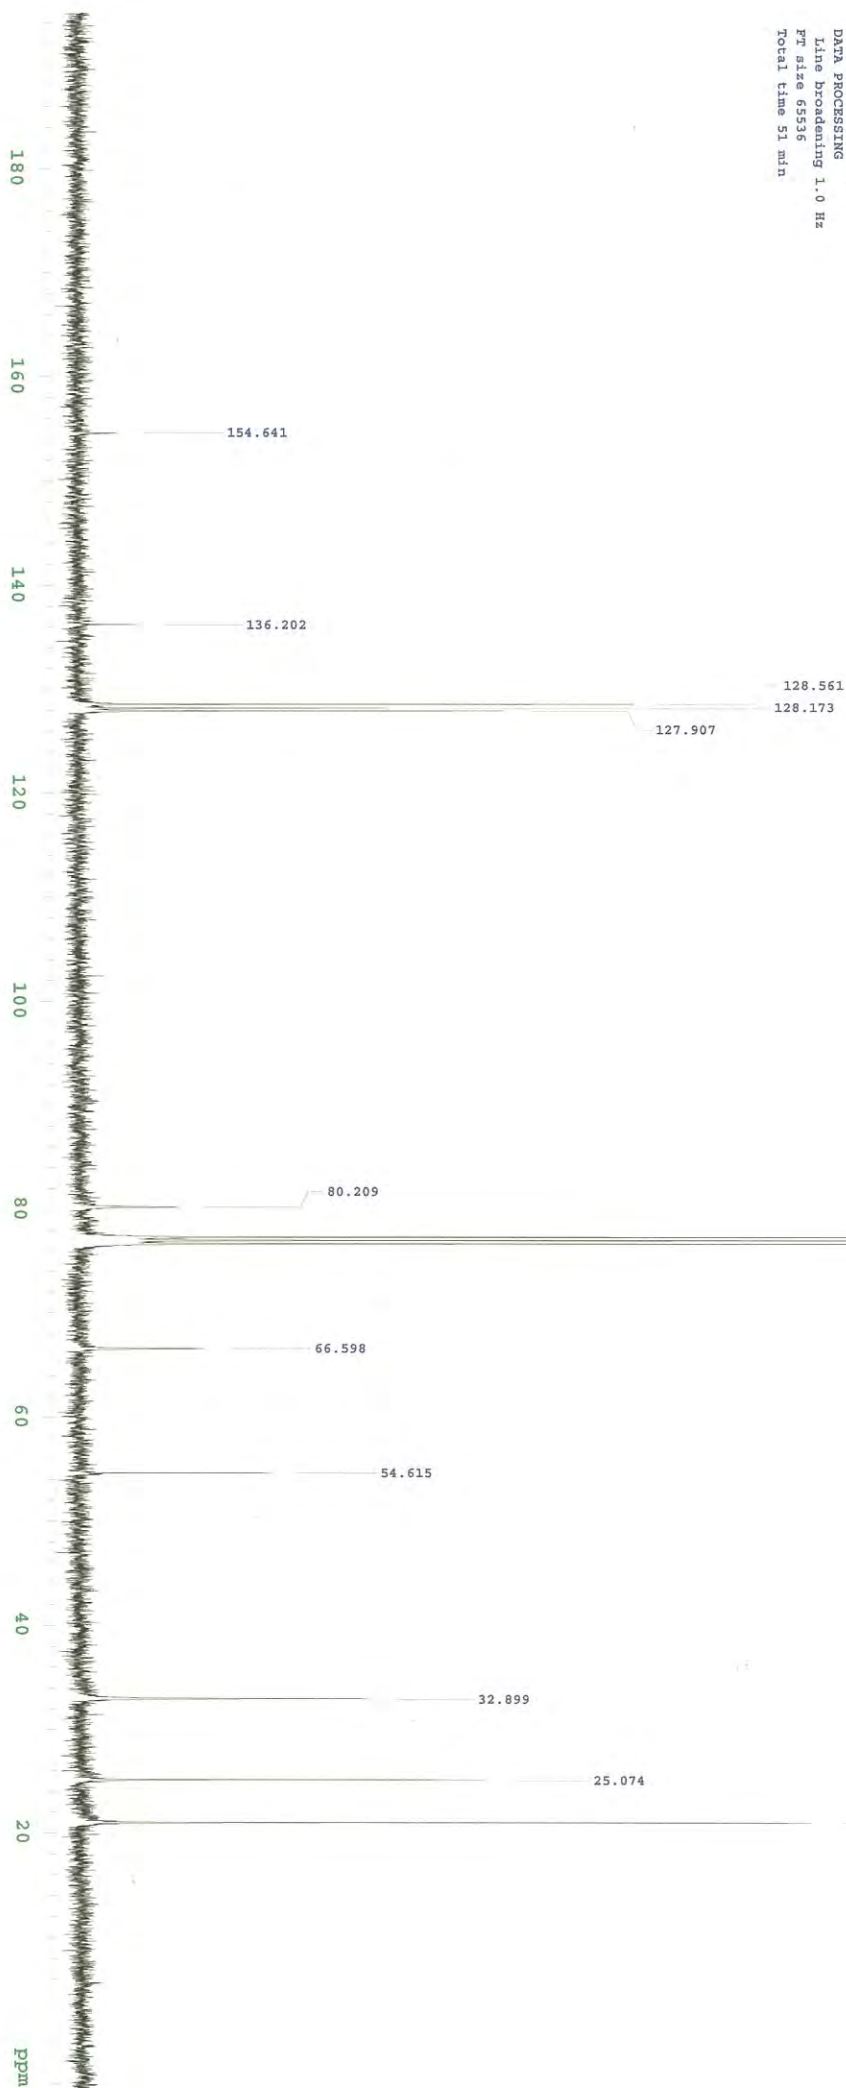

Sample Name:

Data Collected on:  
Agilent-NMR-vnmr400  
Archive directory:

Sample directory:

FidFile: 156-S-M.-diphenyl-benzylnitroalkane-2-1H

Pulse Sequence: PROTON (zgpg3)  
Solvent: cdcl3  
Data collected on: Jul 10 2016

Operator: vnmr1

Relax. delay 1.500 sec  
Pulse 45.0 degrees  
Acq. time 3.500 sec  
Width 6377.6 Hz  
8 repetitions  
OBSERVE H1, 399.0373207 MHz  
DATA PROCESSING  
Line broadening 0.2 Hz  
FT size 65536  
Total time 0 min 40 sec

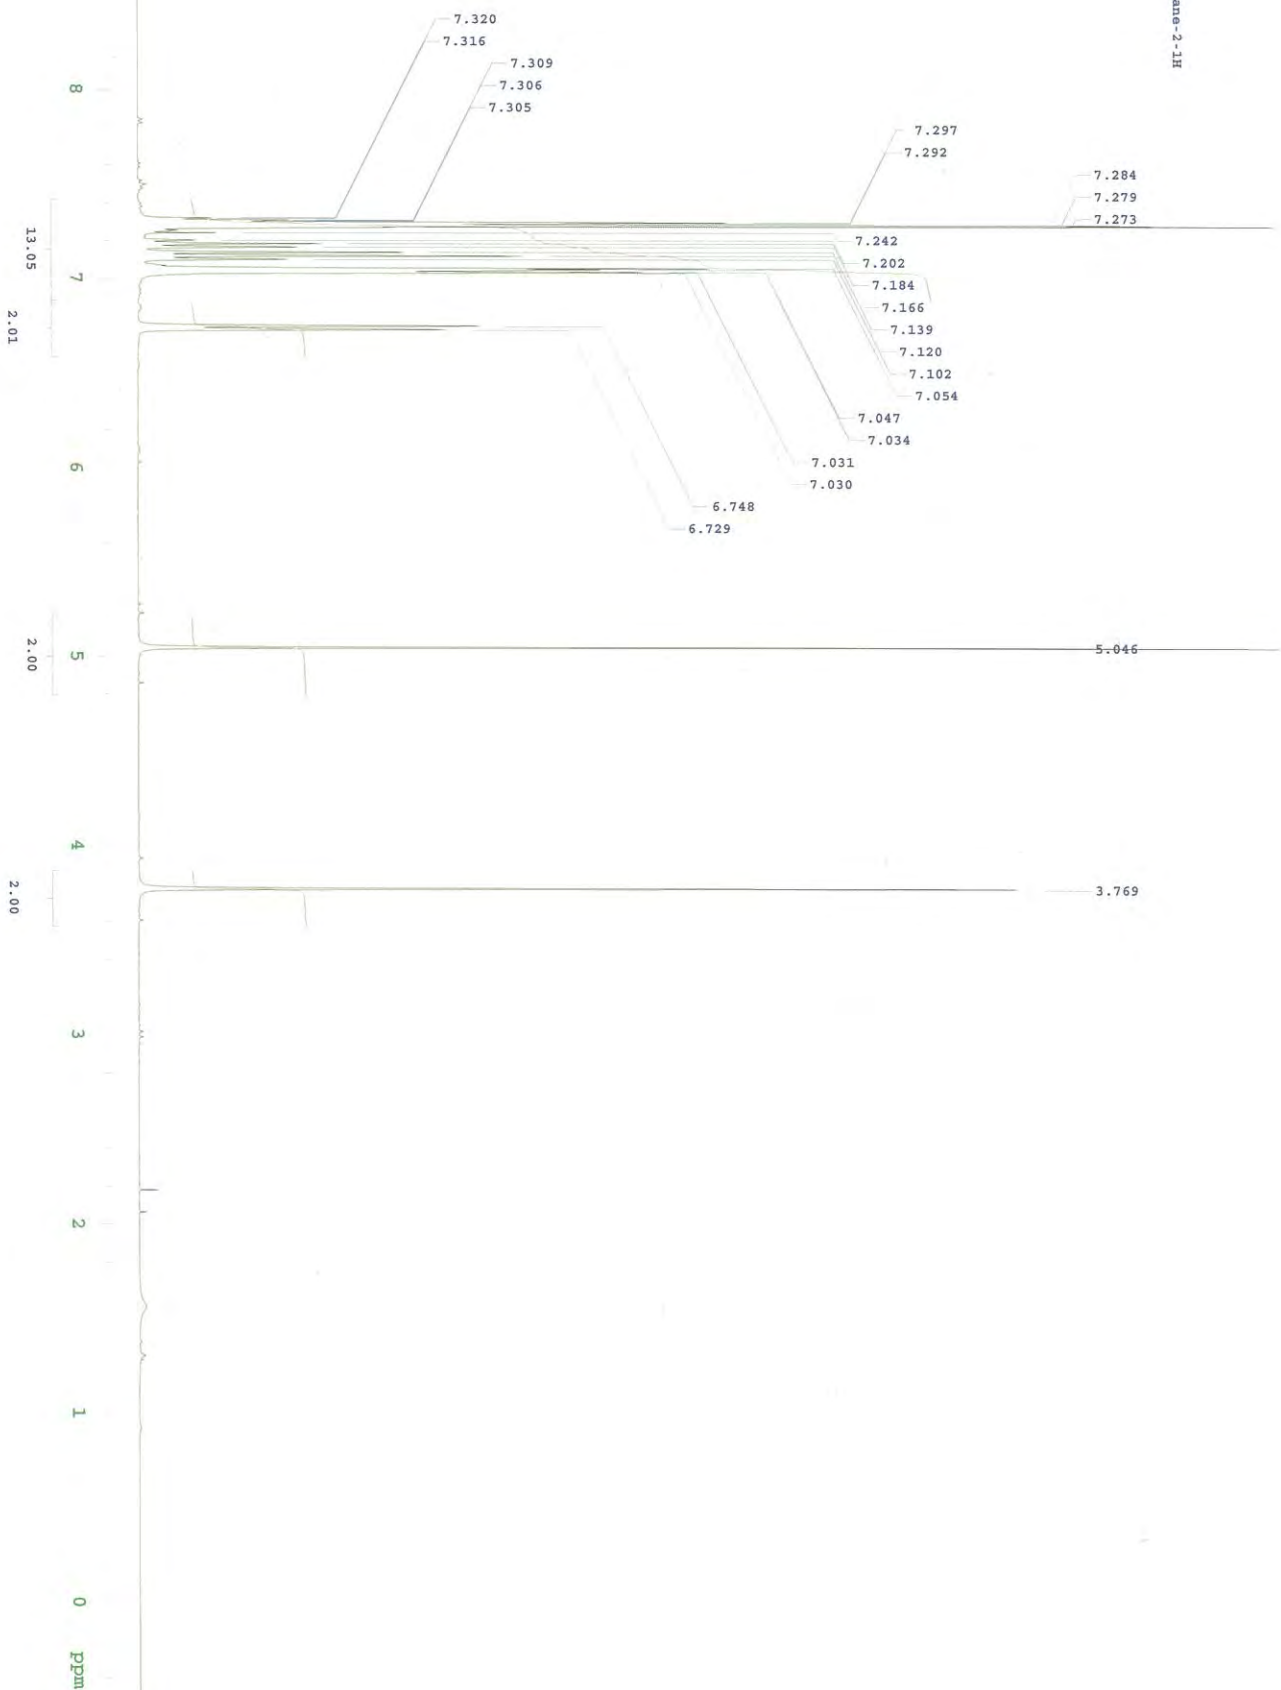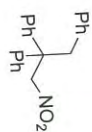

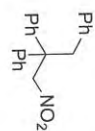

Sample Name:

Data Collected on:  
Agilent-NMR-vnmr400  
Archive directory:

Sample directory:

FidFile: CARBON

Pulse Sequence: CARBON (zgpg1)  
Solvent: cdcl3  
Data collected on: Jul 10 2016

Operator: vnmr1

Relax. delay 1.689 sec  
Pulse 45.0 degrees  
Acq. time 1.311 sec  
Width 25000.0 Hz  
64 repetitions  
OBSERVE C13, 100.380141 MHz  
DECOUPLE H1, 399.0393159 MHz  
Power 43 dB  
continuously on  
WALTZ-16 modulated  
DATA PROCESSING  
line broadening 1.0 Hz  
FT size 65536  
Total time 51 min

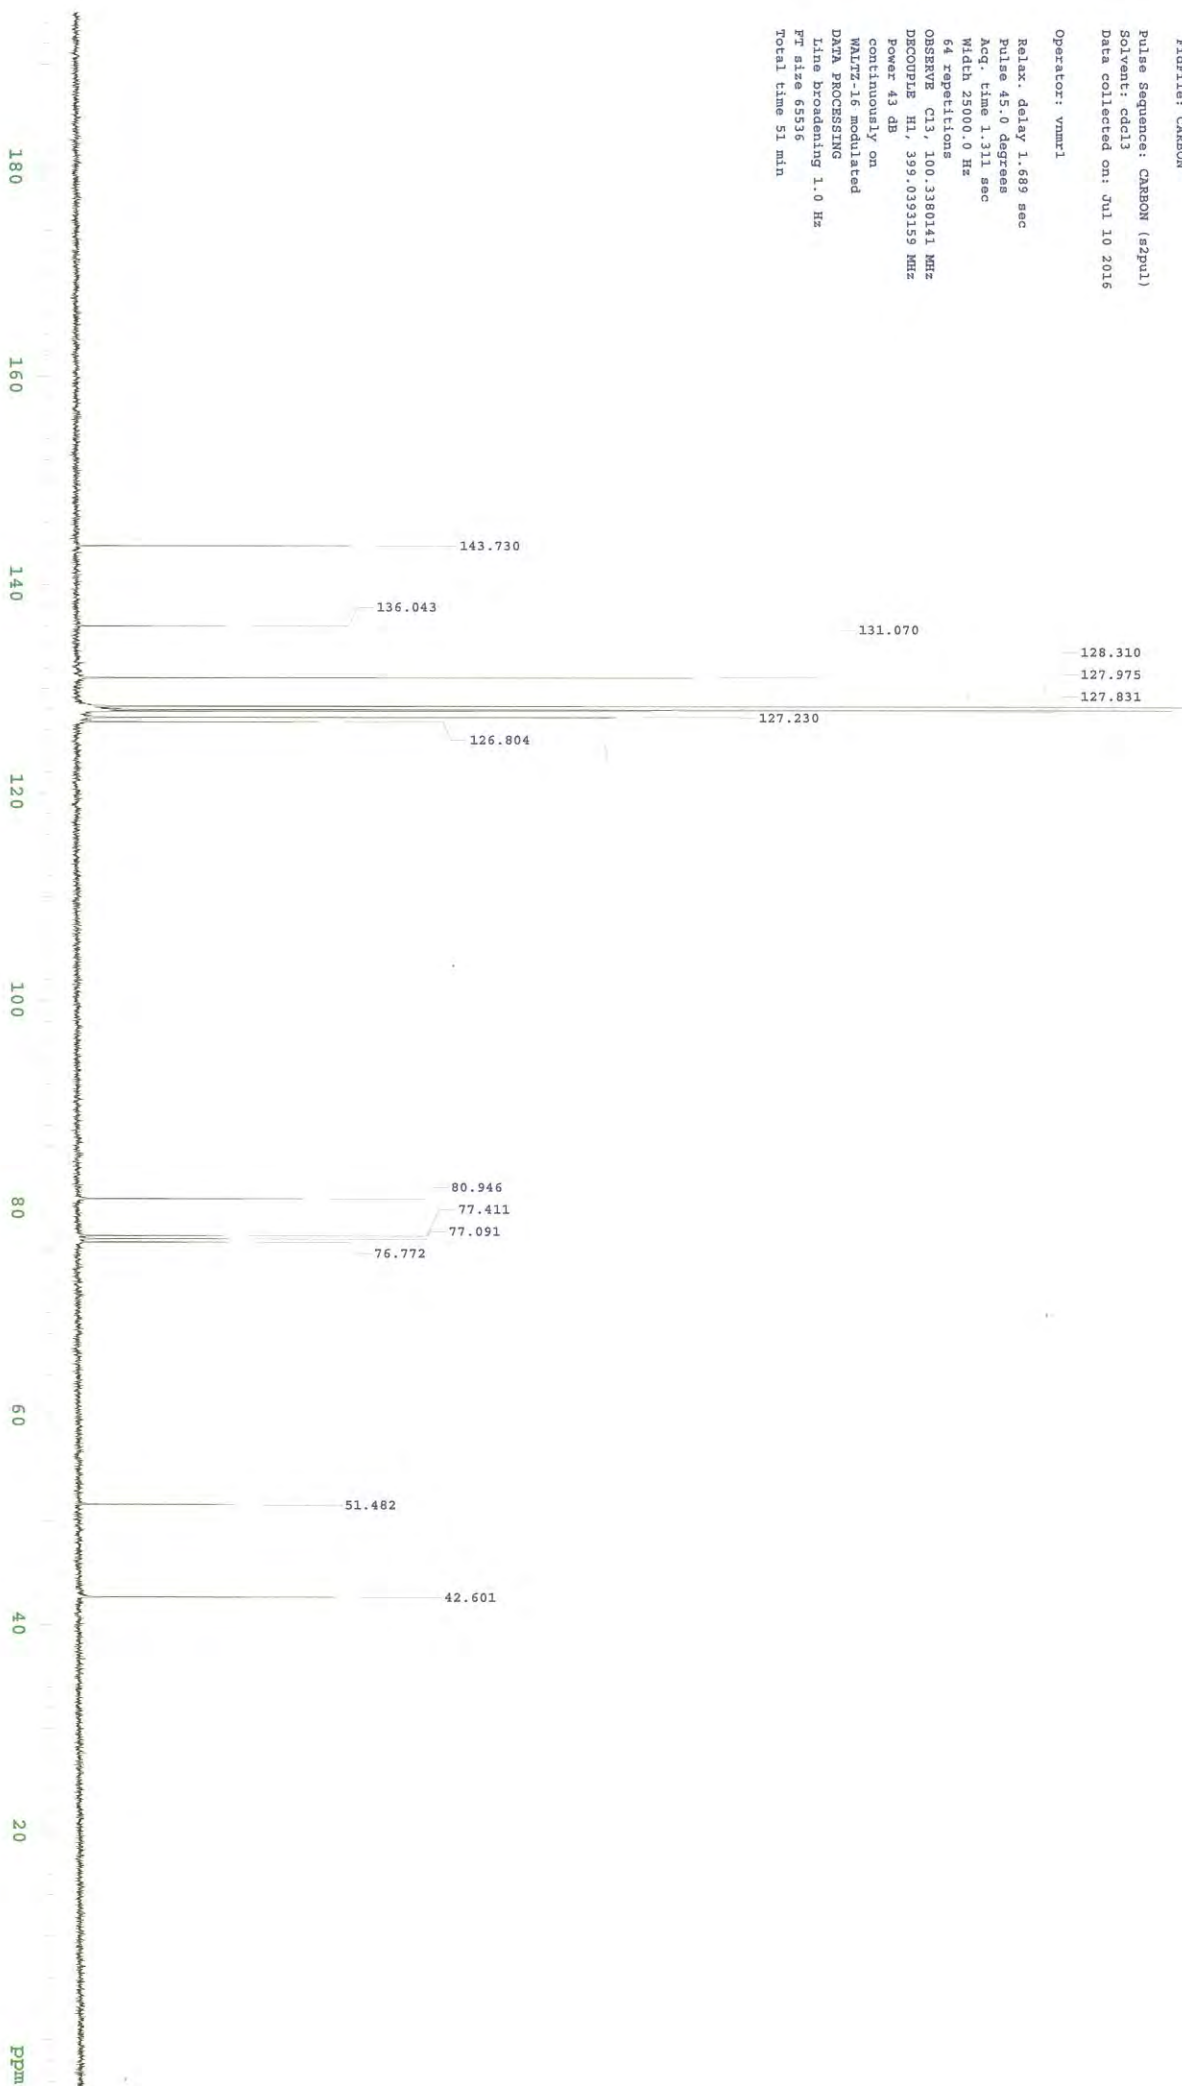

Sample Name:

Data Collected on:  
Agilent-NMR-vnmr400  
Archive directory:

Sample directory:

FidFile: CARBON

Pulse Sequence: CARBON (a2pul)  
Solvent: cdcl3  
Data collected on: Jul 11 2016

Temp: 24.0 C / 297.1 K  
Operator: vnmr1

Relax. delay 1.689 sec  
Pulse 45.0 degrees  
Acq. time 1.311 sec  
Width 25000.0 Hz

64 repetitions  
OBSERVE C13, 100.3380141 MHz  
DECOUPLE H1, 399.03931159 MHz  
Power 43 dB

continuously on  
MALTE-16 modulated  
DATA PROCESSING  
Line broadening 1.0 Hz  
FT size 65536  
Total time 51 min

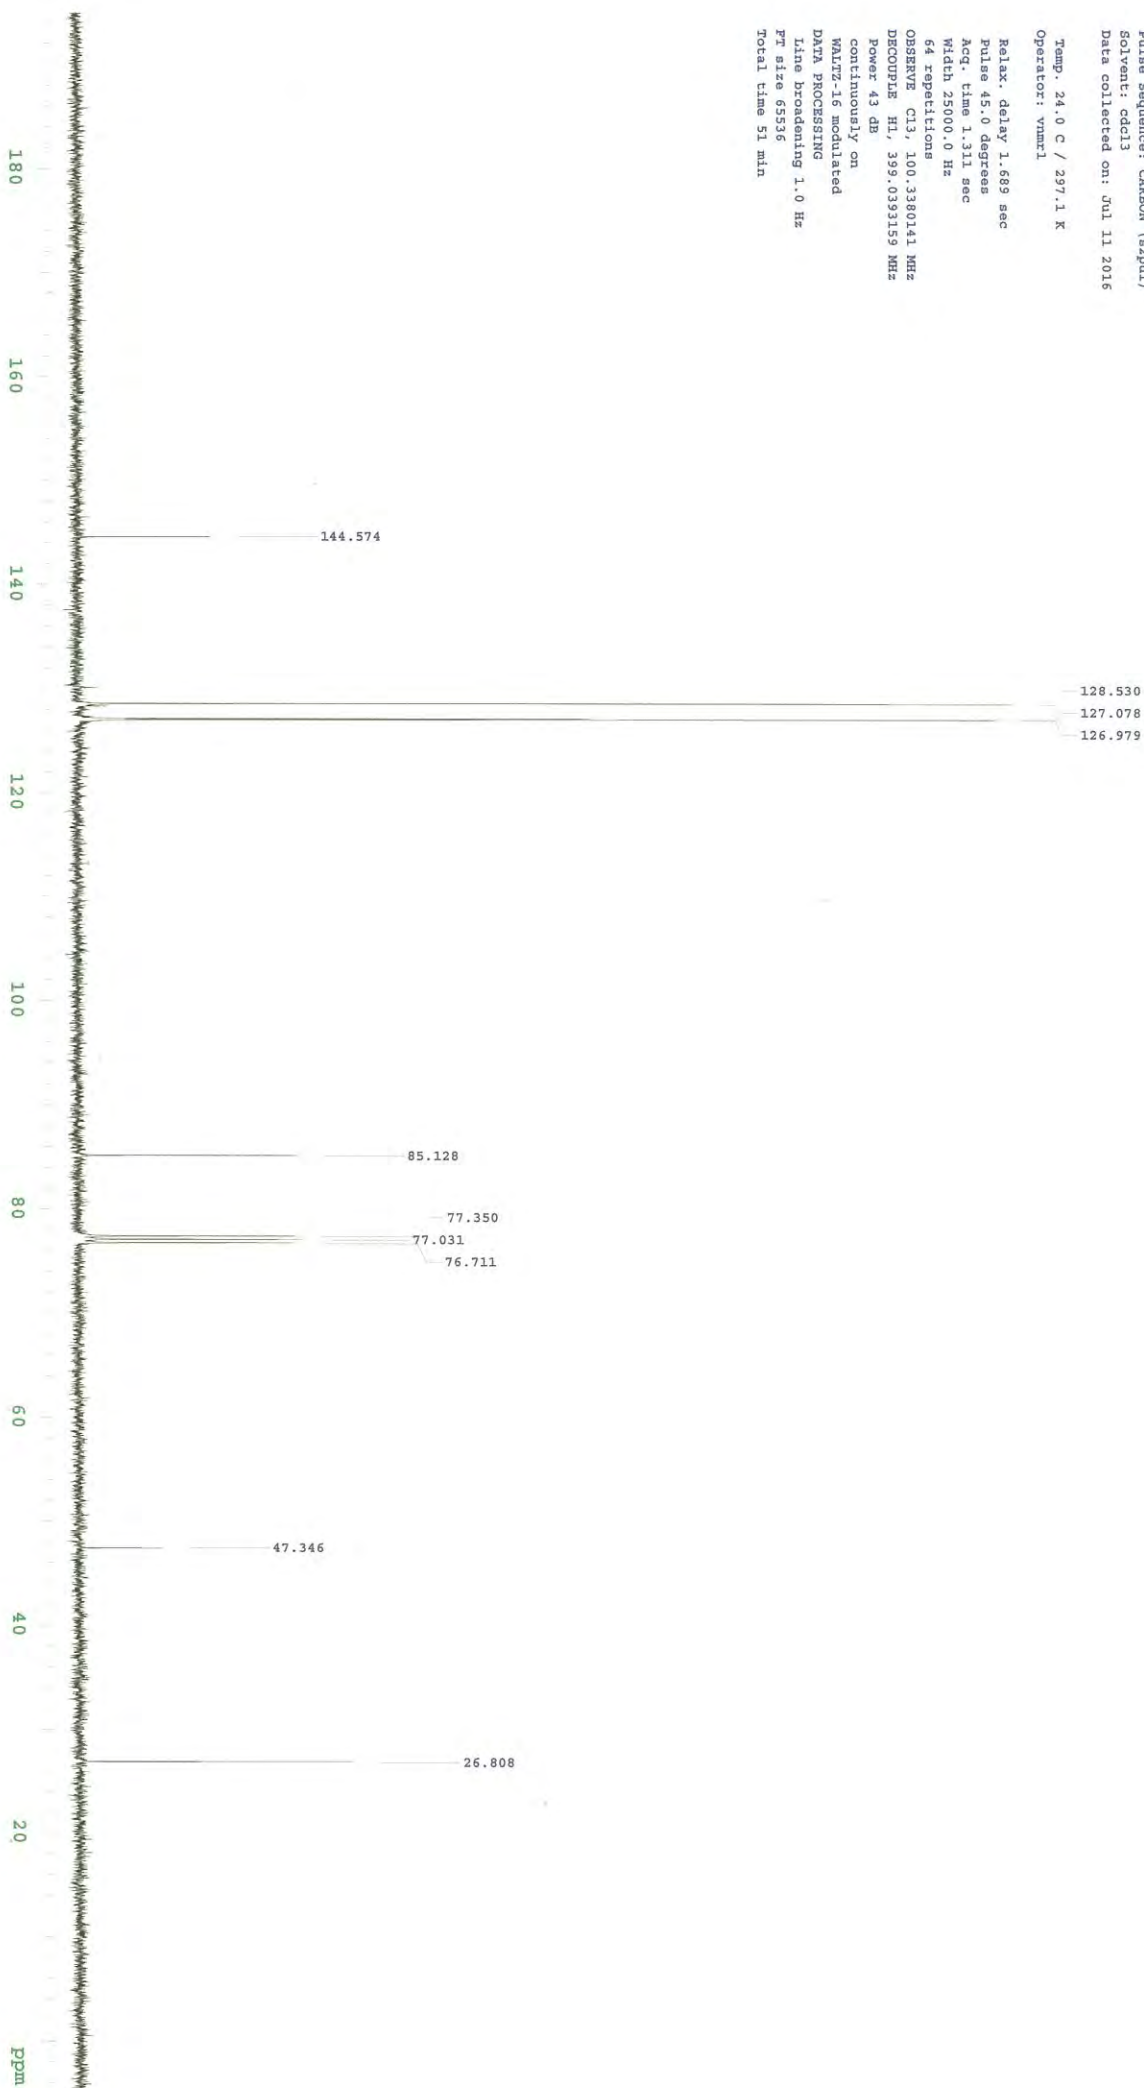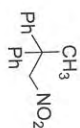

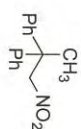

Sample Name:

Data Collected on:  
Agilent-NMR-vnmr400  
Archive directory:

Sample directory:

FidFile: PROTON

Pulse Sequence: PROTON (a2pu1)  
Solvent: cdcl3  
Data collected on: Jul 11 2016

Operator: vnmr1

Relax. delay 1.500 sec  
Pulse 45.0 degrees  
Acq. time 3.500 sec  
Width 6377.6 Hz  
8 repetitions

OBSERVE H1, 399.0373207 MHz  
DATA PROCESSING  
Line broadening 0.2 Hz  
FT size 65536  
Total time 0 min 40 sec

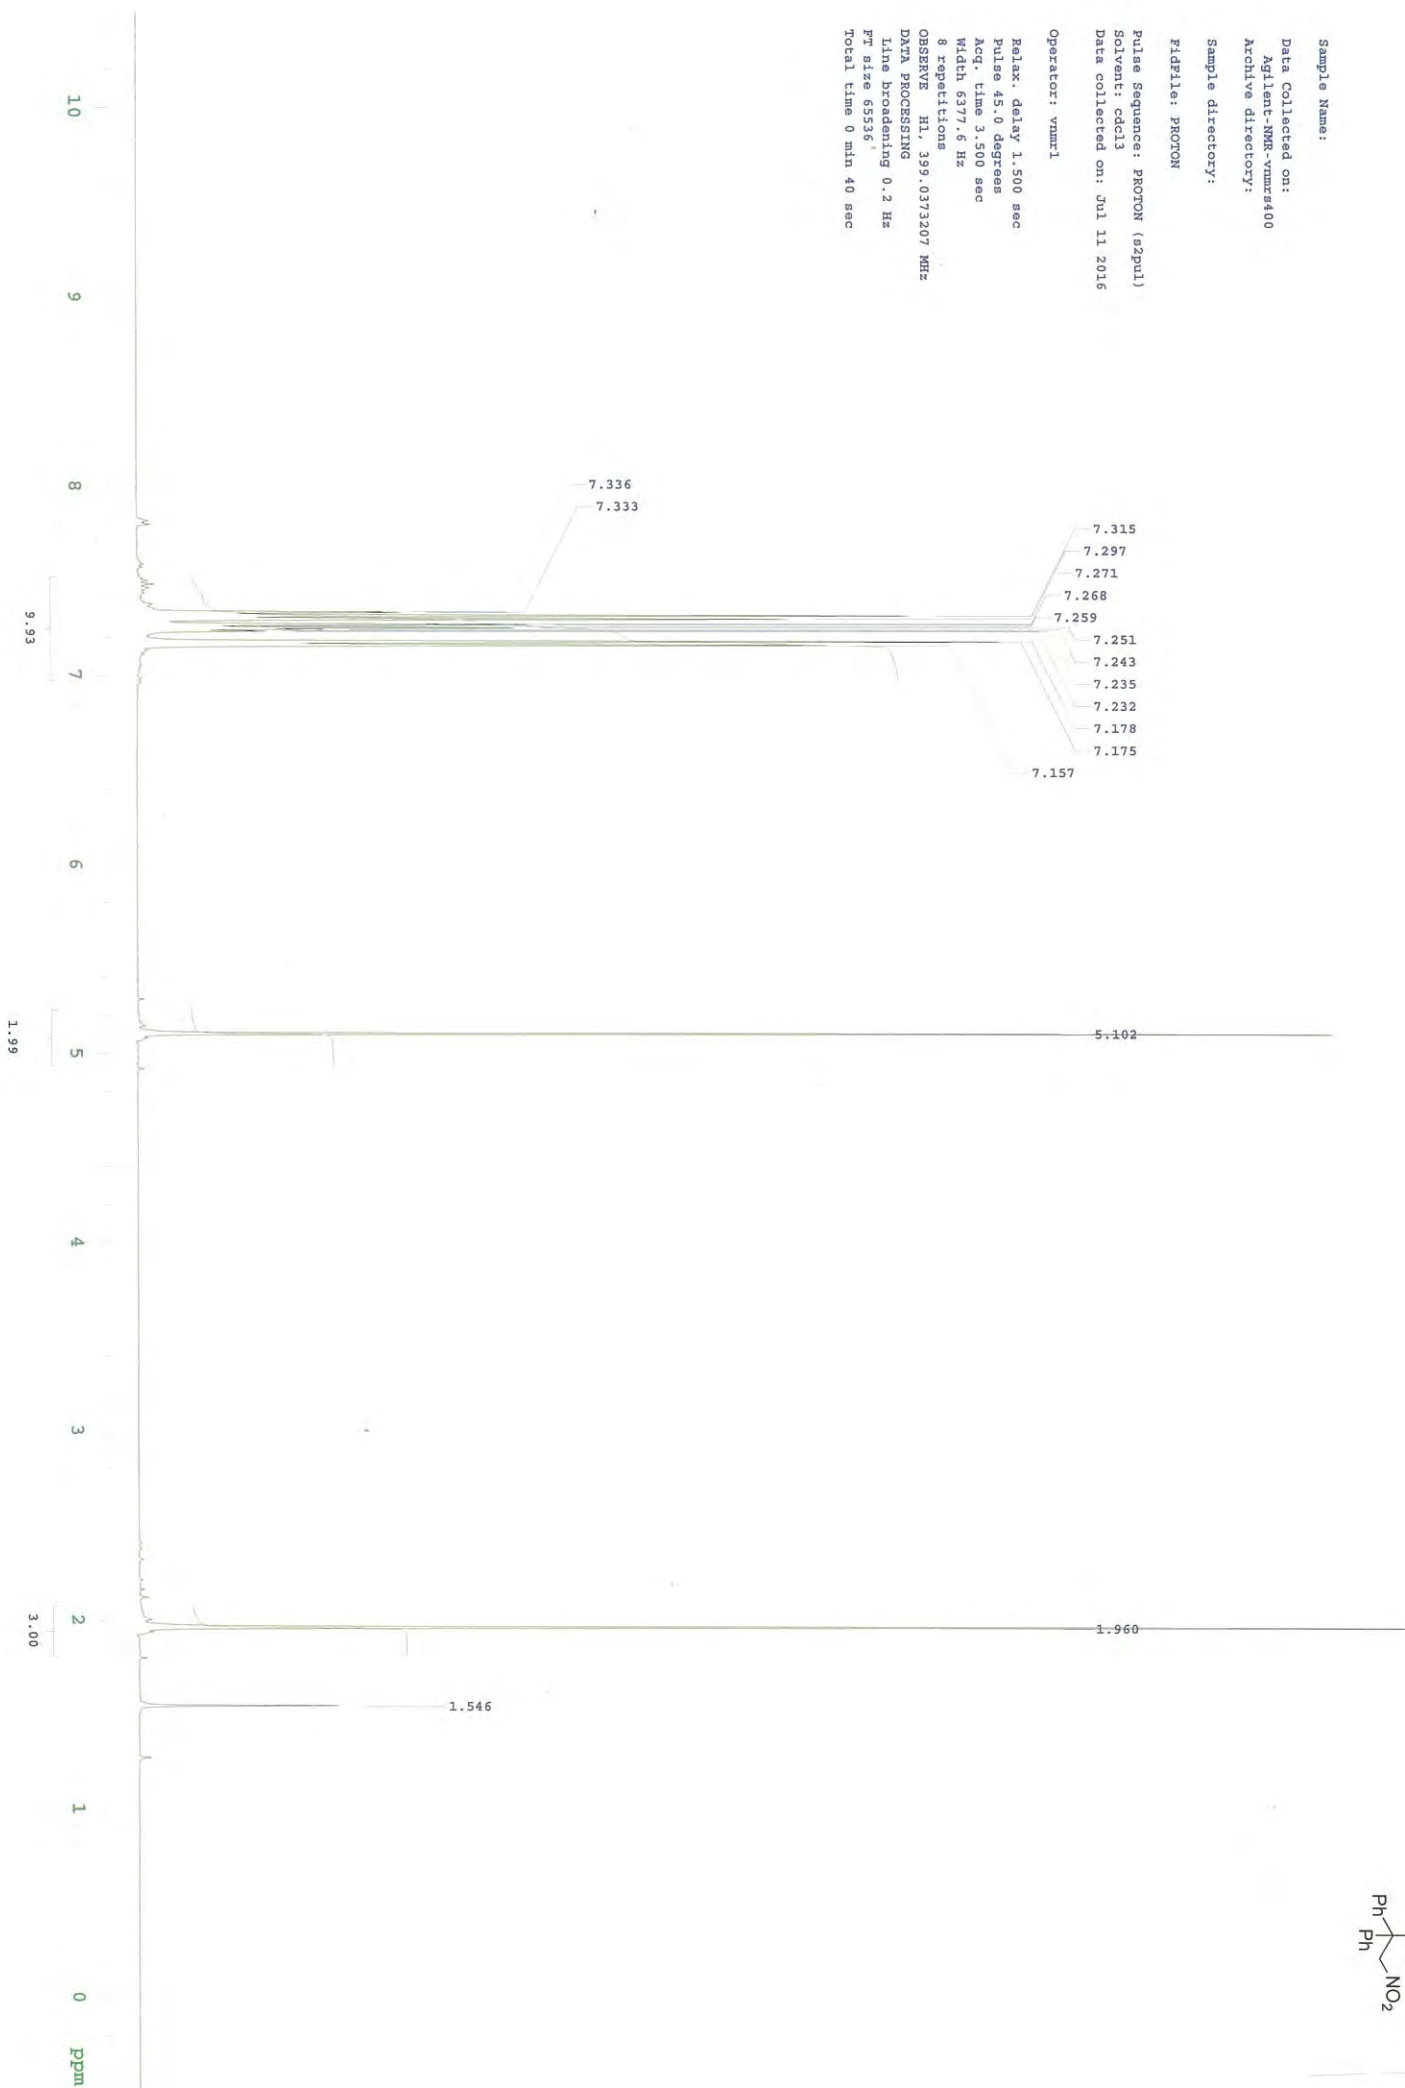



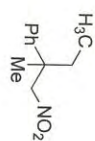

Sample Name:

Data Collected on:  
Agilent-NMR-vnmr400  
Archive directory:

Sample directory:

F1dFile: PROTON

Pulse Sequence: PROTON (a2pu1)  
Solvent: cdcl3  
Data collected on: Jul 18 2016

Operator: vnmr1

Relax. delay 1.500 sec  
Pulse 45.0 degrees  
Acq. time 3.500 sec  
Width 6377.6 Hz  
8 repetitions  
OBSERVE H1, 399.0373207 MHz  
DATA PROCESSING  
Line broadening 0.2 Hz  
FT size 65536  
Total time 0 min 40 sec

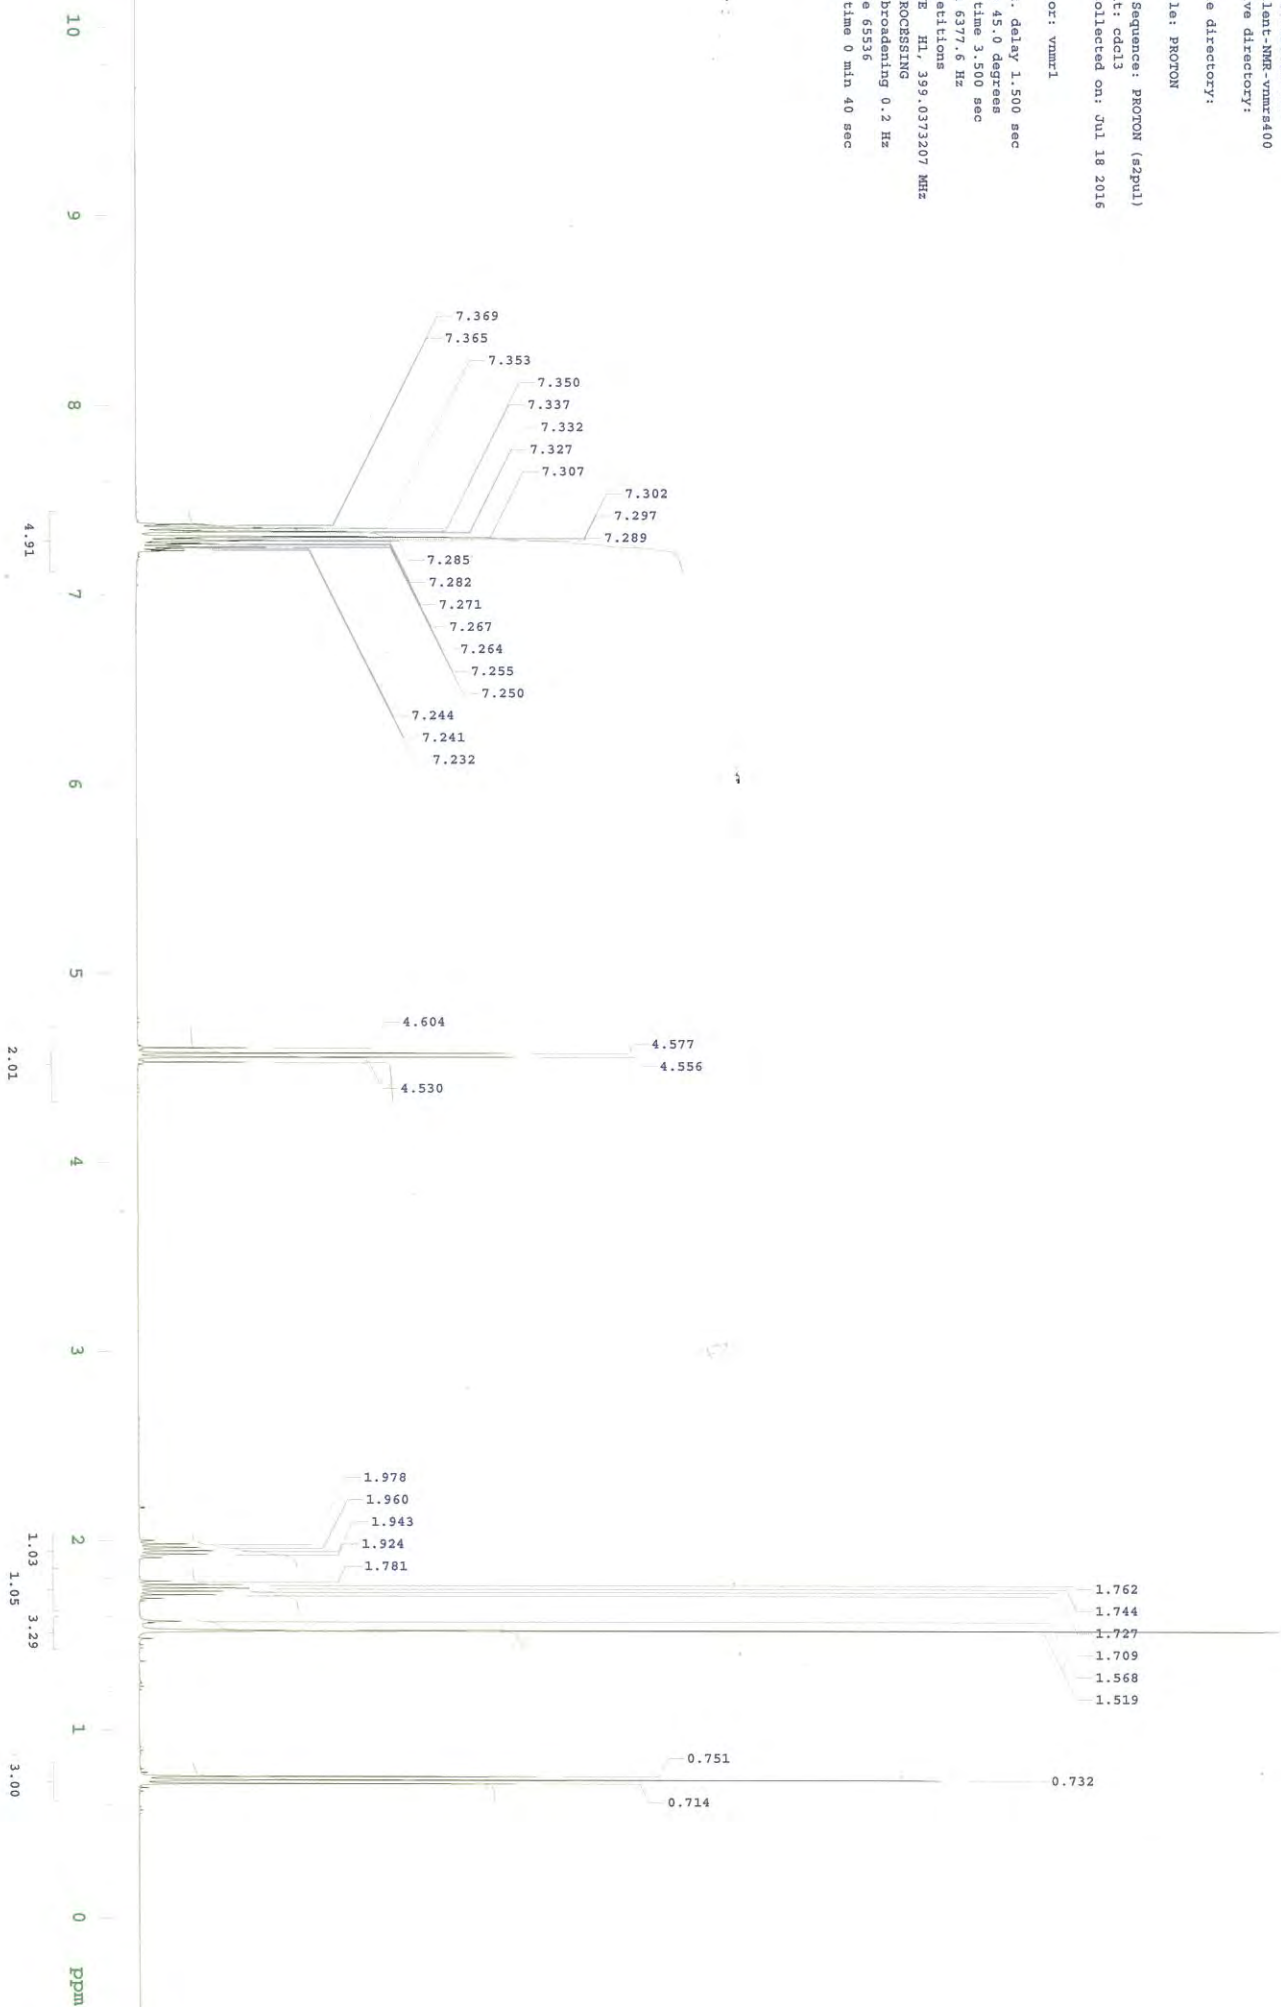

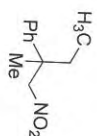

Sample Name:

Data Collected on:  
Agilent-NMR-vnmr400  
Archive directory:

Sample directory:

FidFile: CARBON

Pulse Sequence: CARBON (zgpg3)  
Solvent: cdcl3  
Data collected on: Jul 18 2016

Temp: 23.2 C / 296.4 K  
Operator: vnmr1

Relax. delay 1.689 sec  
Pulse 45.0 degrees  
Acq. time 1.311 sec  
Width 25000.0 Hz  
64 repetitions

OBSERVE C13, 100.3380141 MHz  
DECOUPLE H1, 399.0393159 MHz  
Power 43 dB

continuously on  
WALTZ-16 modulated  
DATA PROCESSING  
Line broadening 1.0 Hz  
FT size 65536  
Total time 51 min

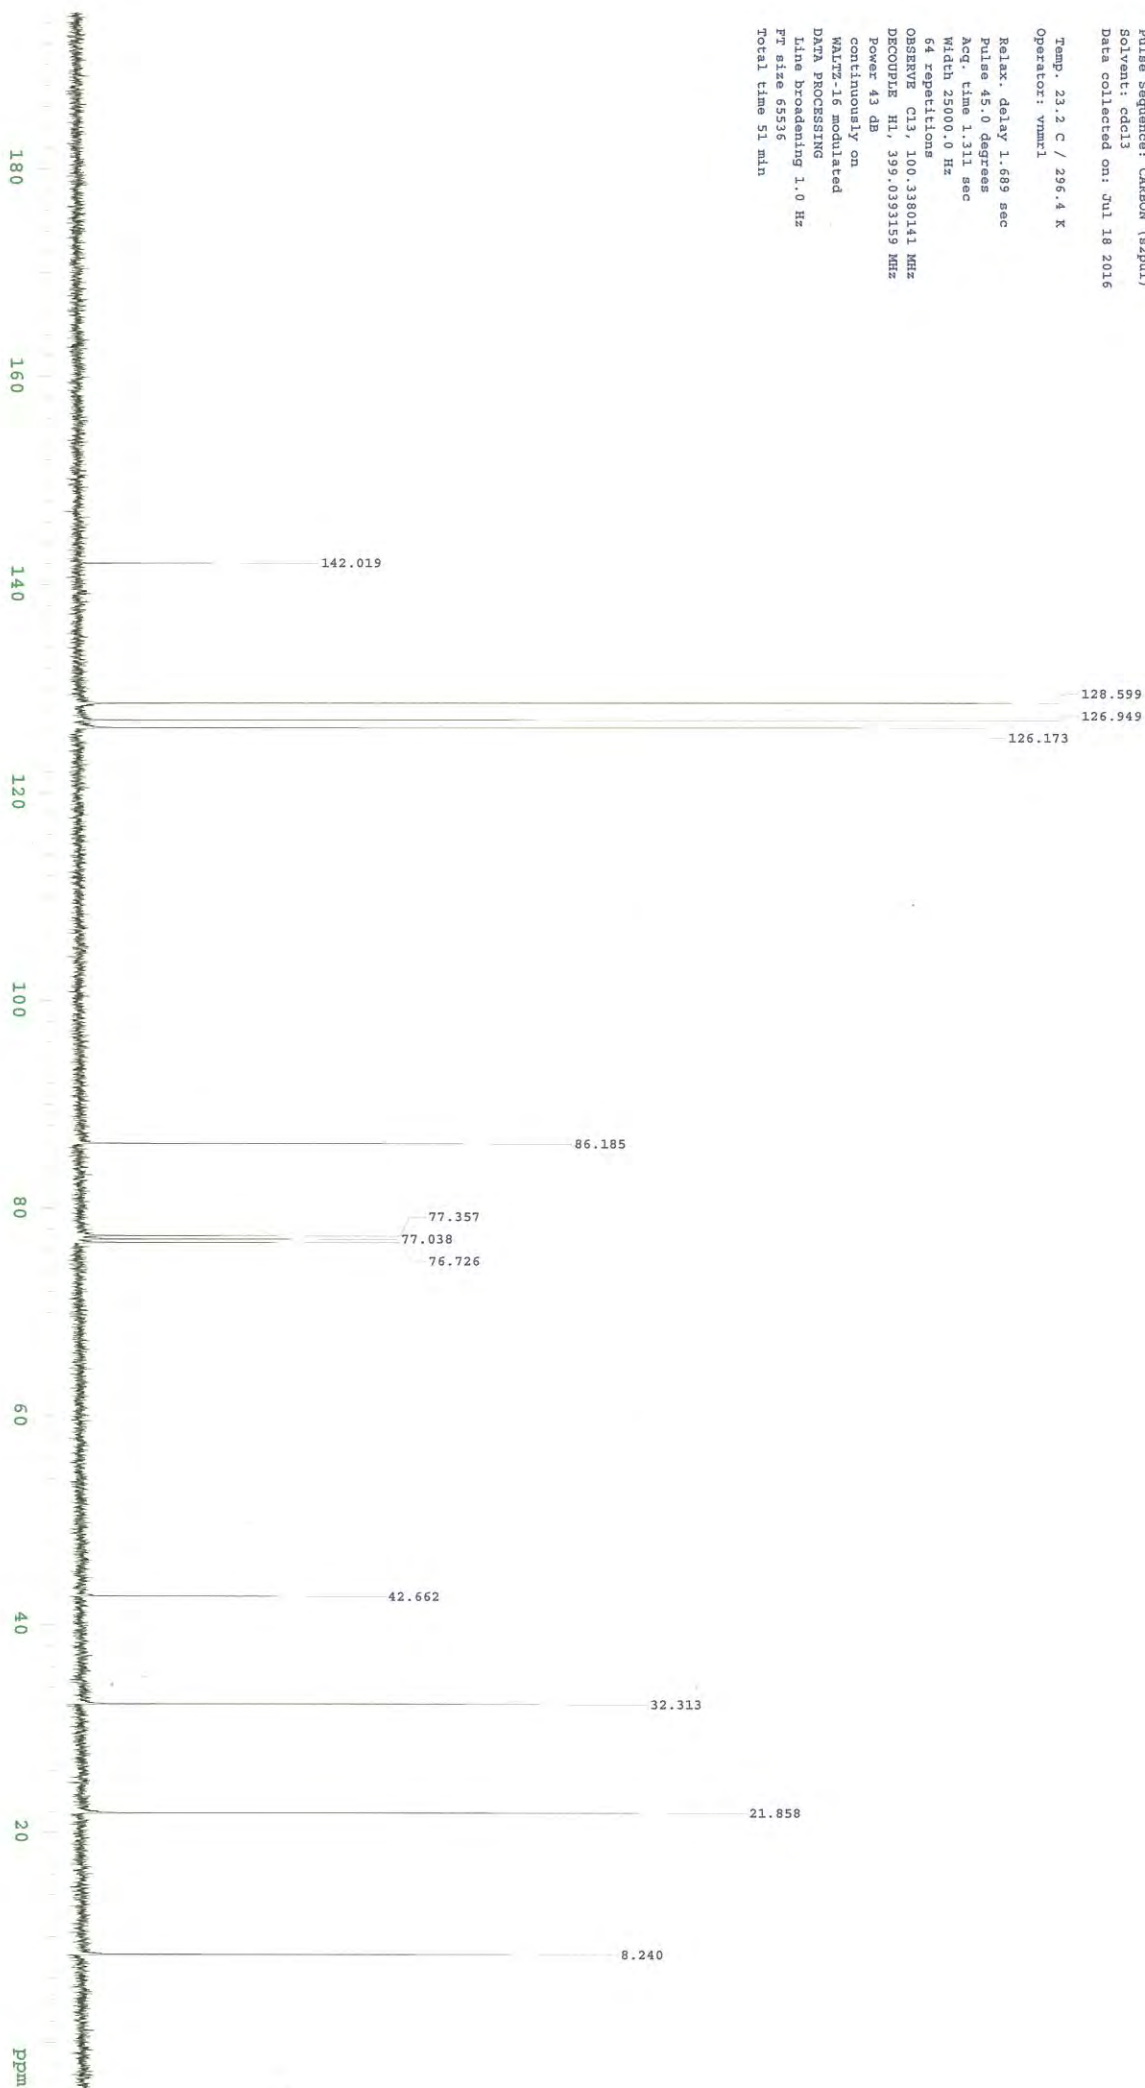

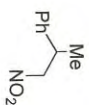

Sample Name:

Data Collected on:  
Agilent-NMR-vnmr400  
Archive directory:

Sample directory:

FidFile: PROTON

Pulse Sequence: PROTON (a2pul)

Solvent: cdcl3

Data collected on: Jul 23 2016

Operator: vnmr1

Relax. delay 1.500 sec

Pulse 45.0 degrees

Acq. time 3.500 sec

Width 6377.6 Hz

8 repetitions

OBSERVE H1, 399.0373207 MHz

DATA PROCESSING

Line broadening 0.2 Hz

FT size 65536

Total time 0 min 40 sec

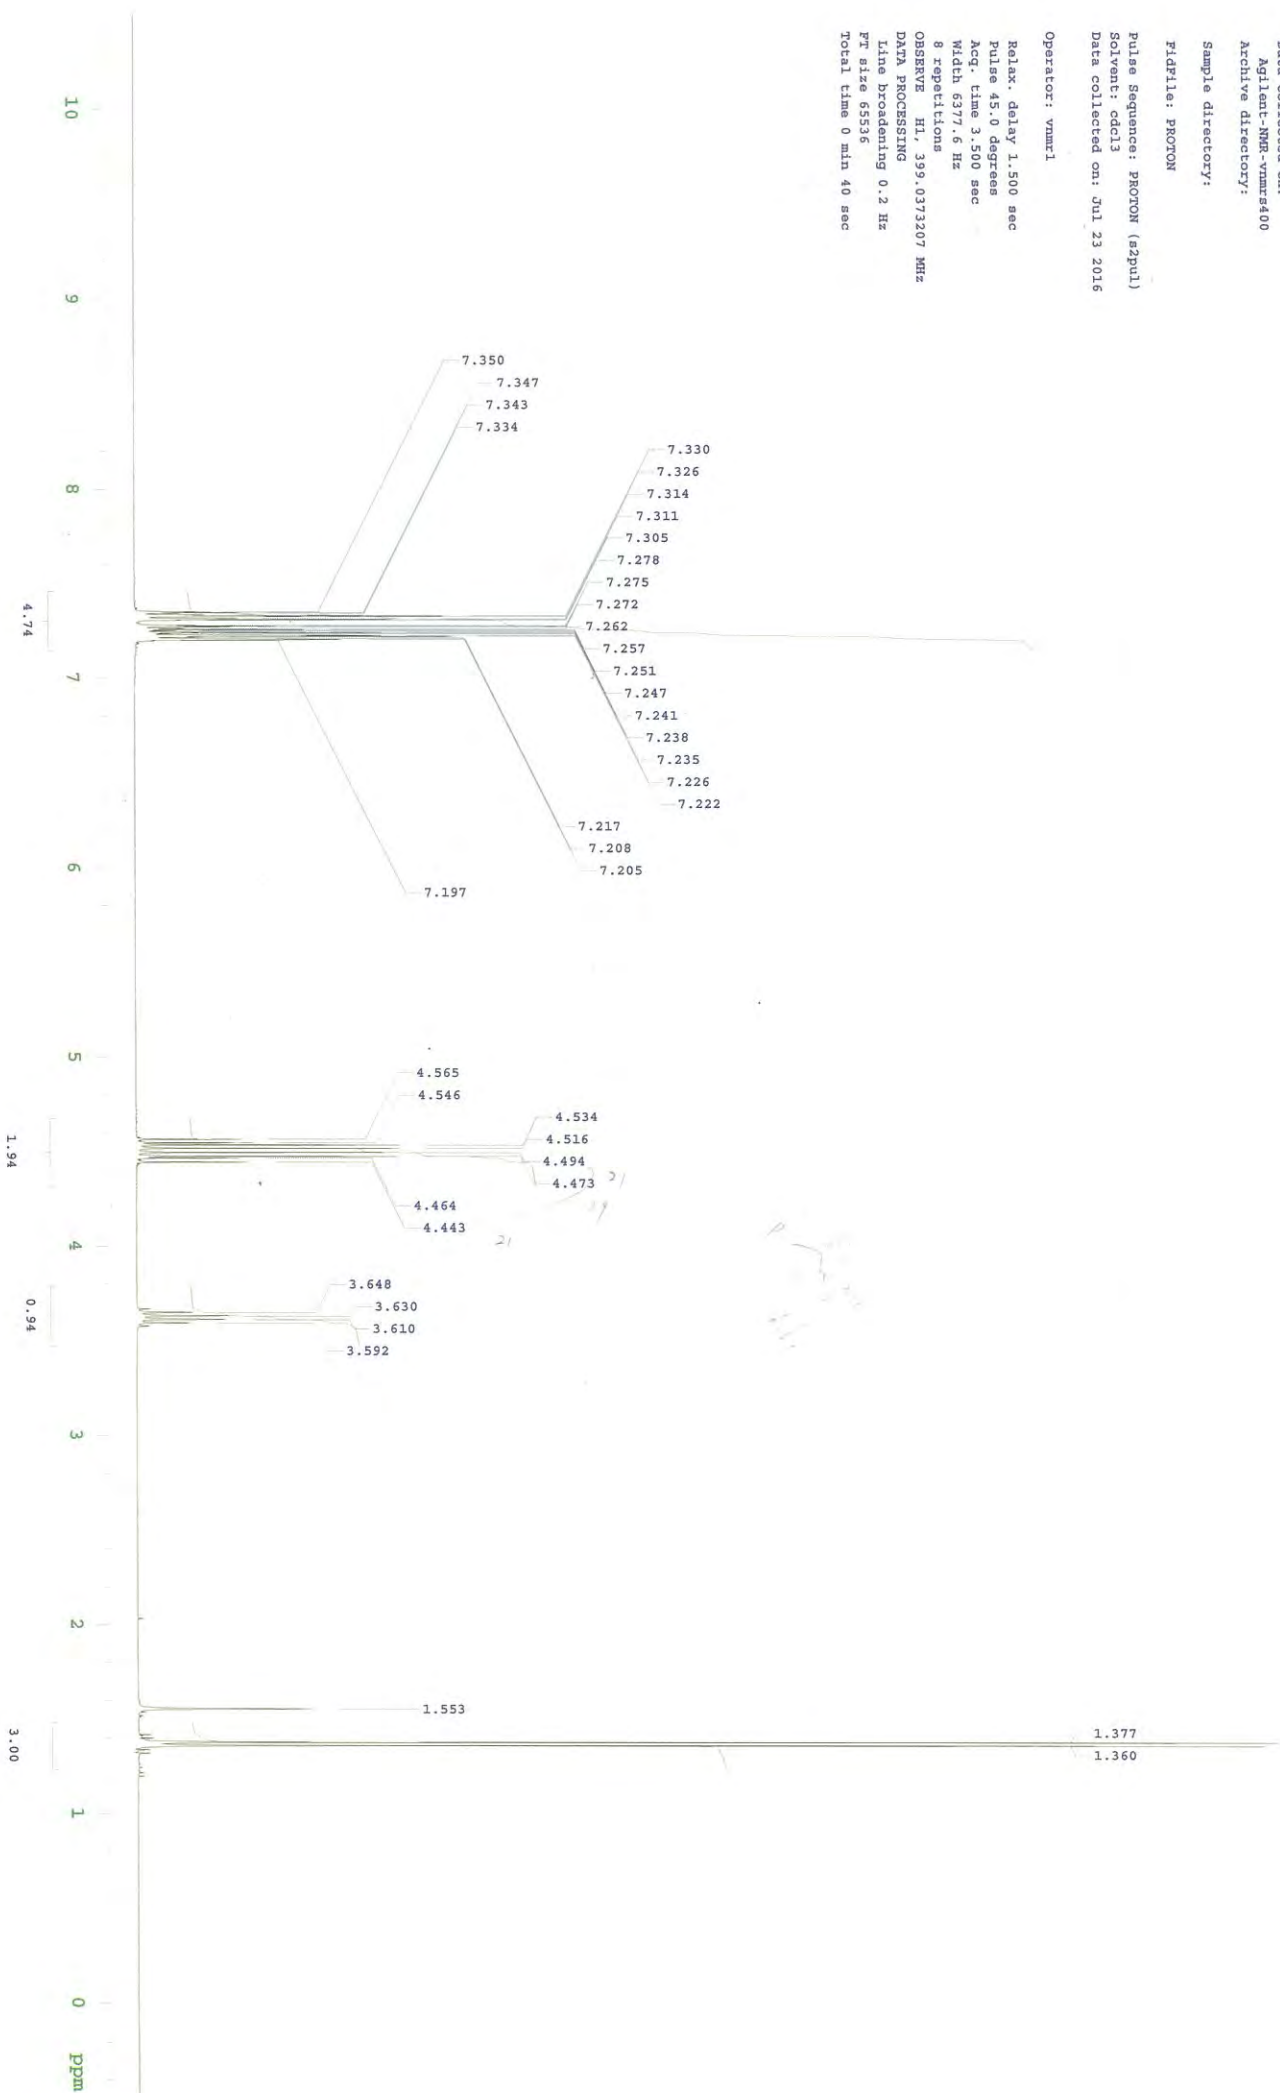

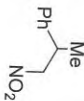

Sample Name:

Data Collected on:  
Agilent-NMR-vnmrs400  
Archive directory:

Sample directory:

F1dFile: CARBON

Pulse Sequence: CARBON (a2pul)  
Solvent: cdcl3  
Data collected on: JUL 23 2016

Temp: 23.2 C / 296.4 K  
Operator: vnmr1

Relax. delay 1.689 sec  
Pulse 45.0 degrees  
Acq. time 1.311 sec  
Width 25000.0 Hz

64 repetitions  
OBSERVE C13, 100.380141 MHz  
DECOUPLE H1, 399.0393159 MHz  
Power 43 dB  
continuously on

WALTZ-16 modulated  
DATA PROCESSING  
Line broadening 1.0 Hz  
FT size 65536  
Total time 51 min

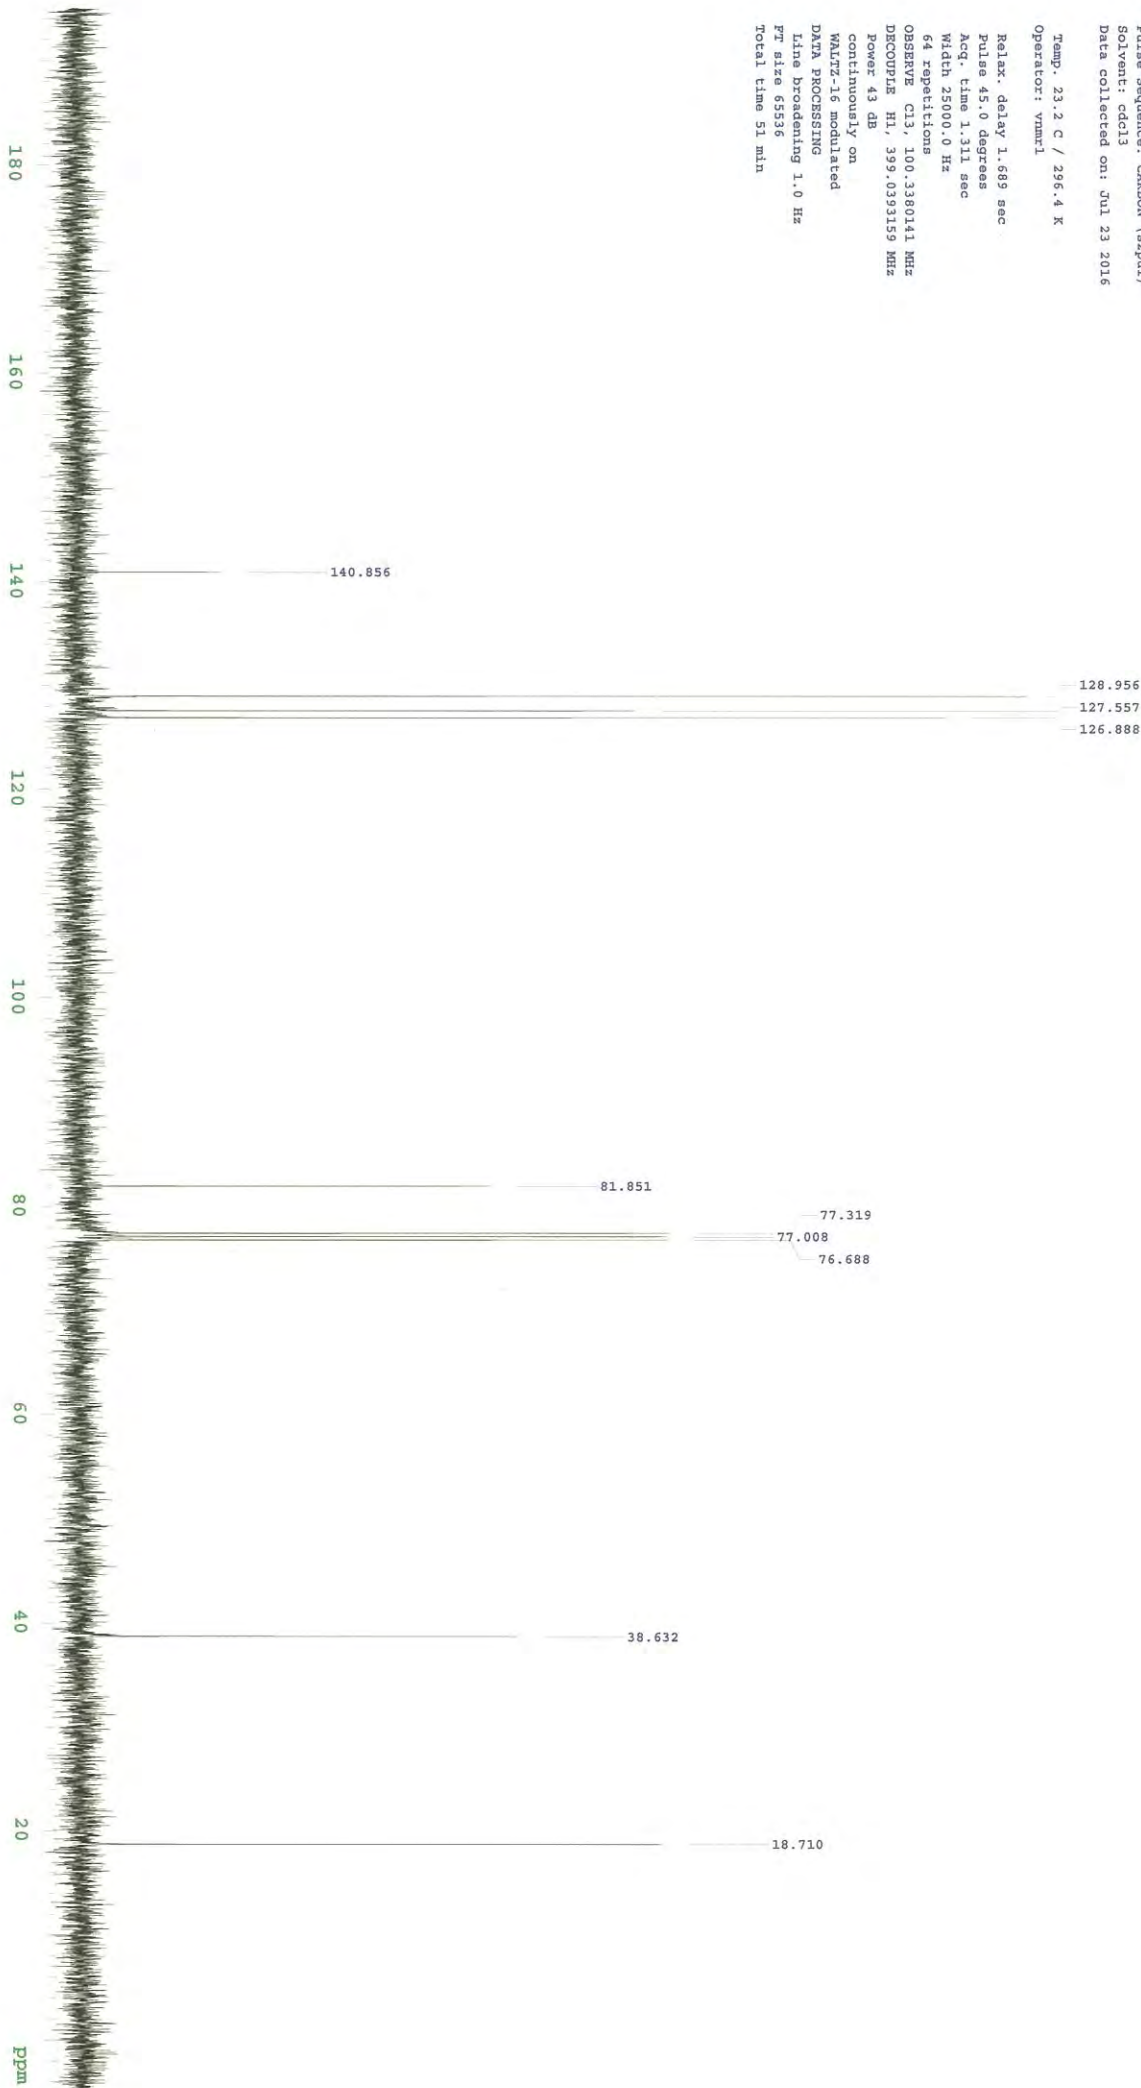

Sample Name:

Data Collected on:  
Agilent-NMR-vnmr400  
Archive directory:

Sample directory:

FIDFile: PROTON

Pulse Sequence: PROTON (szpul)  
Solvent: cdcl3  
Data collected on: Jul 25 2016

Operator: vnmr1

Relax. delay 1.500 sec  
Pulse 45.0 degrees  
Acq. time 3.500 sec  
Width 6377.6 Hz  
8 repetitions  
OBSERVE H1, 399.0373207 MHz  
DATA PROCESSING  
Line broadening 0.2 Hz  
FT size 65536  
Total time 0 min 40 sec

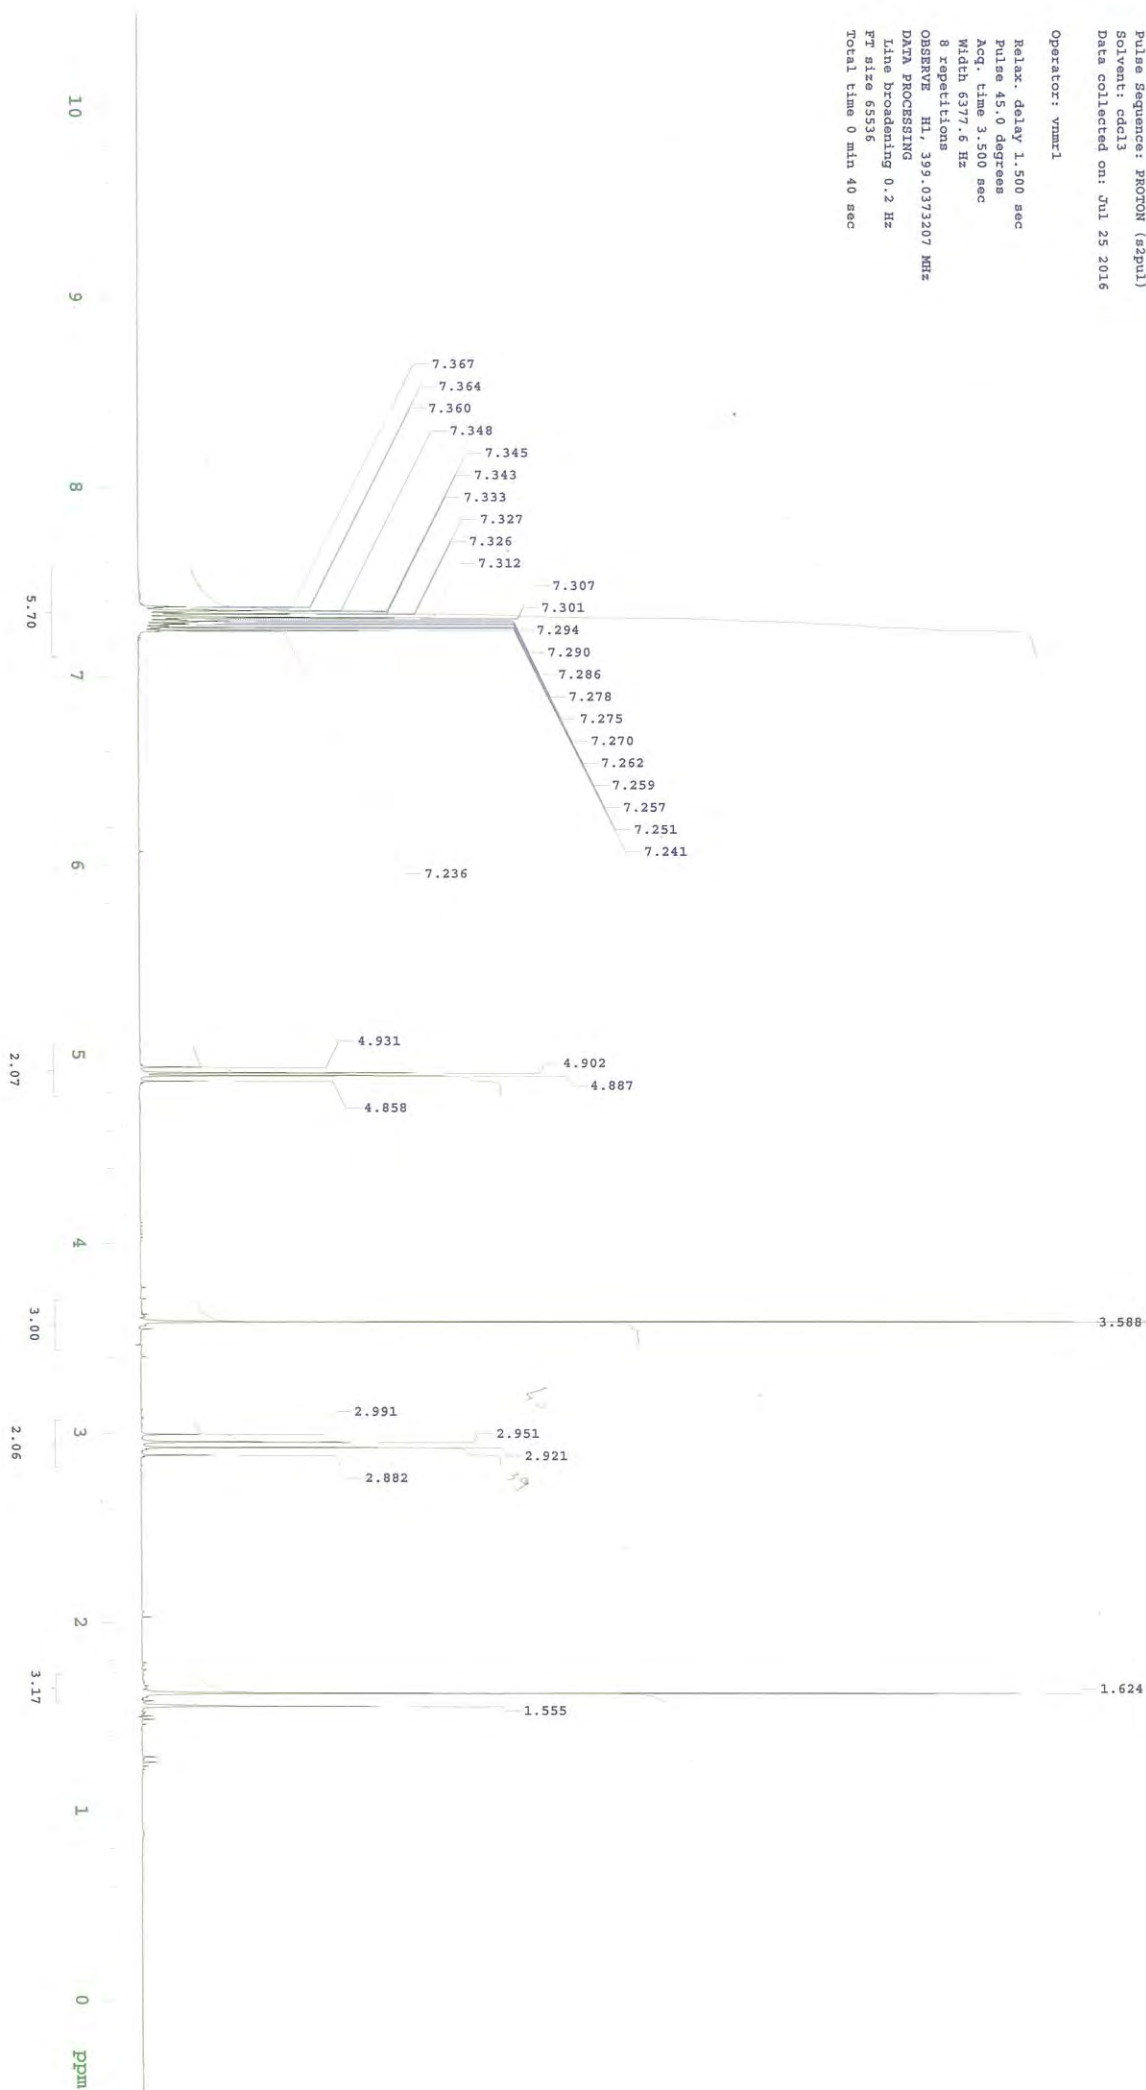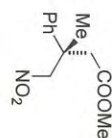

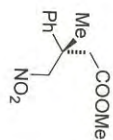

Sample Name:

Data Collected on:  
Agilent-NMR-vnmr5400  
Archive directory:

Sample directory:

FidFile: CARBON

Pulse Sequence: CARBON (zgpg3)  
Solvent: cdcl3  
Data collected on: Jul 25 2016

Operator: vnmr1

Relax. delay 1.689 sec  
Pulse 45.0 degrees  
Acq. time 1.311 sec  
Width 25000.0 Hz  
128 repetitions  
OBSERVE C13, 100.380141 MHz  
DECOUPLE H1, 399.039359 MHz  
Power 43 dB  
continuously on  
WALTZ-16 modulated  
DATA PROCESSING  
Line broadening 1.0 Hz  
FT size 65536  
Total time 51 min

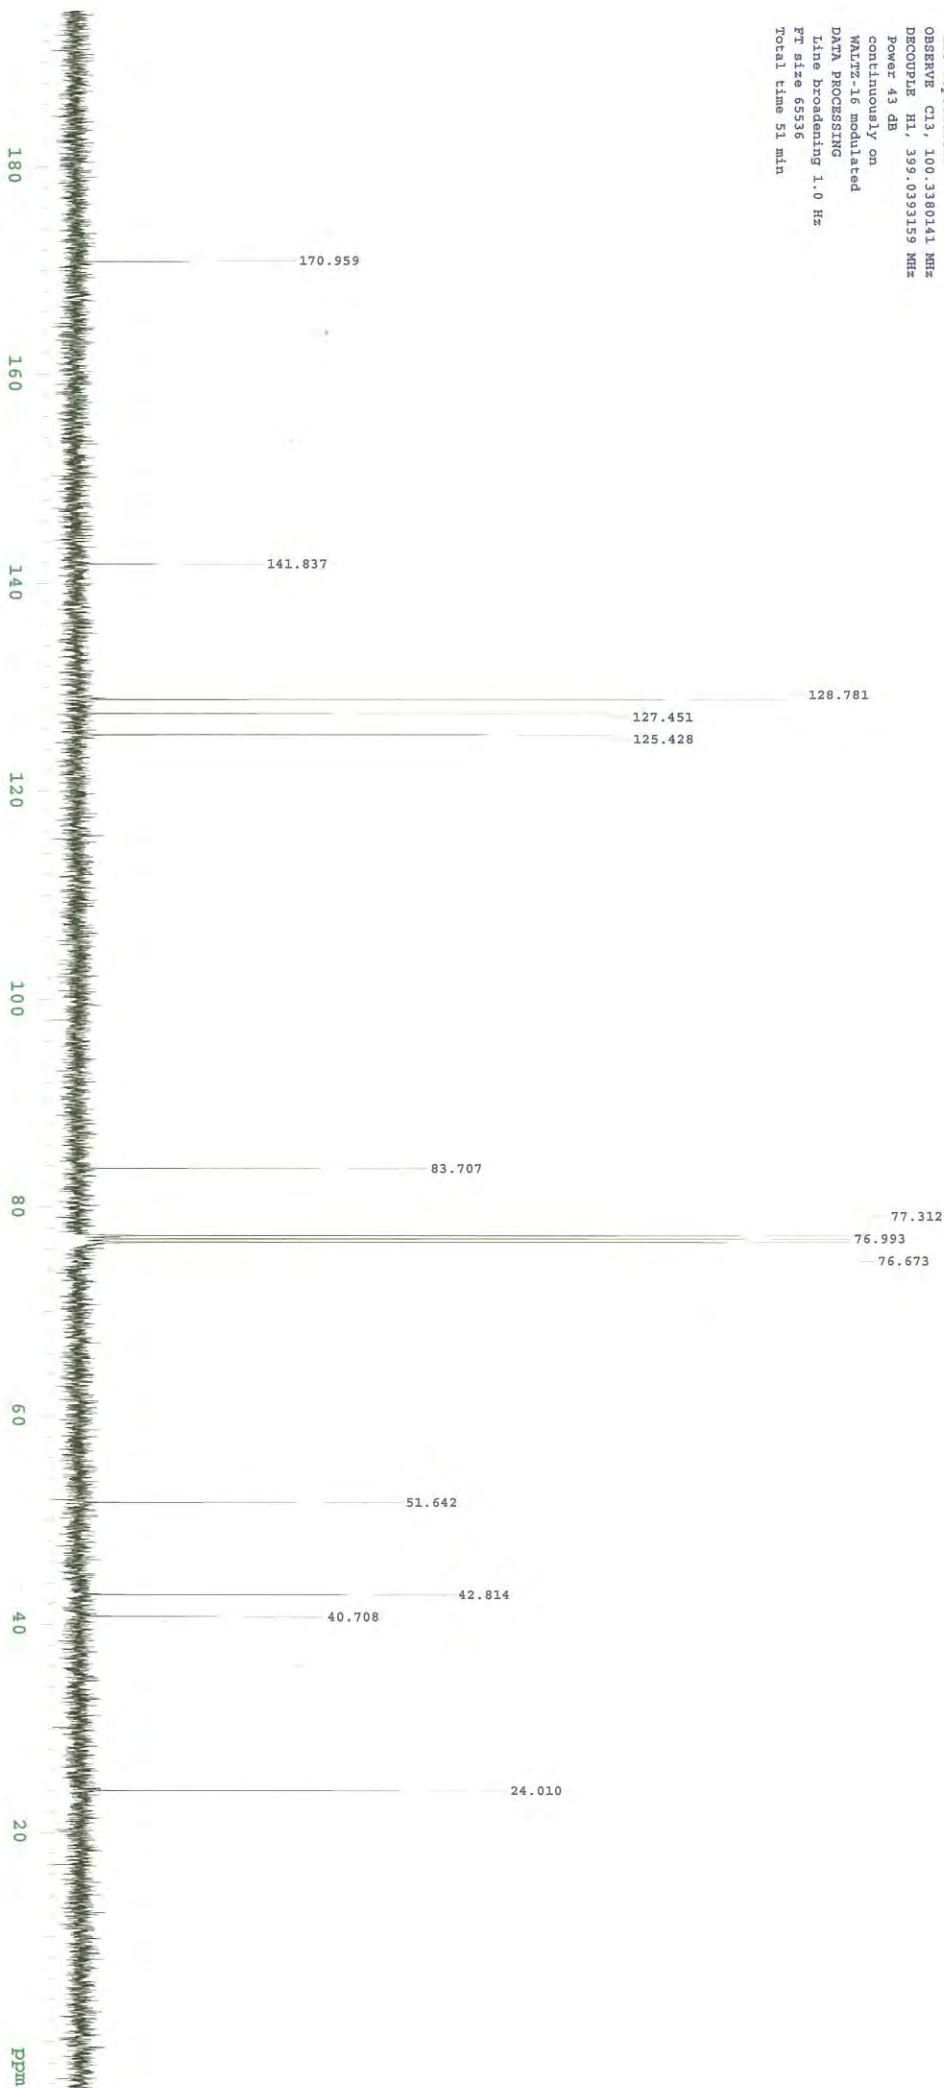



Sample Name:

Data Collected on:  
Agilent-NMR-vnmr5400  
Archive directory:

Sample directory:

FIDFile: PROTON

Pulse Sequence: PROTON (zgpg30)  
Solvent: cdcl3  
Data collected on: Jul 25 2016

Operator: vnmr1

Relax. delay 1.500 sec  
Pulse 45.0 degrees  
Acq. time 3.500 sec  
Width 6377.6 Hz  
8 repetitions  
OBSERVE H1, 399.0373207 MHz  
Line broadening 0.2 Hz  
FT size 65536  
Total time 0 min 40 sec

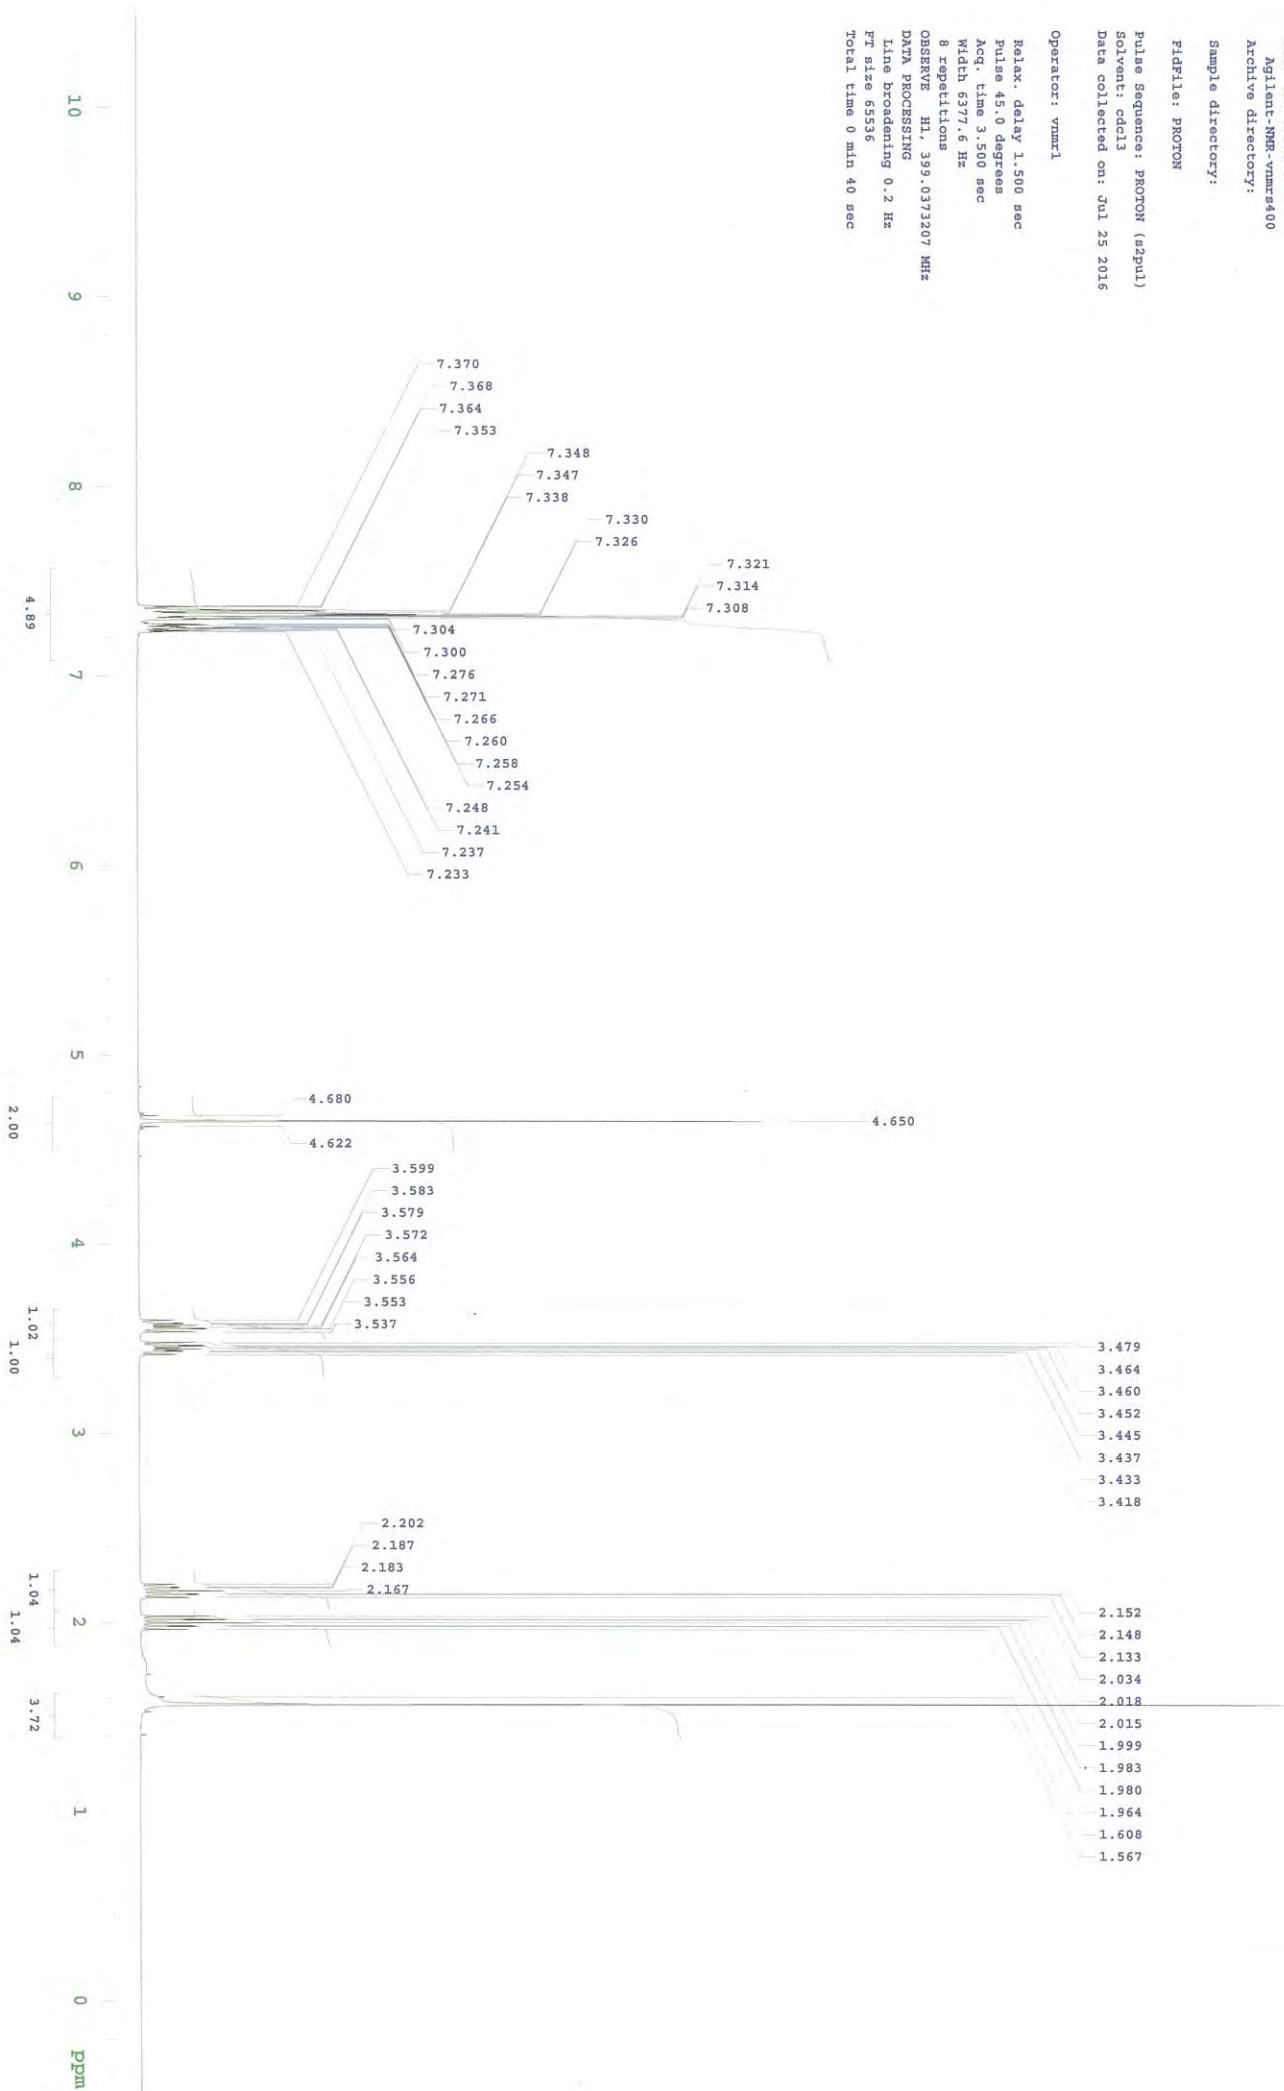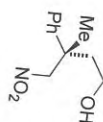

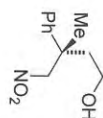

Sample Name:

Data Collected on:  
Agilent-NMR-vnmr400  
Archive directory:

Sample directory:

FIDFile: CARBON

Pulse Sequence: CARBON (s2pul)  
Solvent: cdcl3  
Data collected on: Jul 25 2016

Temp: 23.8 C / 296.9 K  
Operator: vnmr1

Relax. delay 1.689 sec  
Pulse 45.0 degrees  
Acq. time 1.311 sec  
Width 25000.0 Hz  
64 repetitions  
OBSERVE C13, 100.3380141 MHz  
DECOUPLE H1, 399.0393159 MHz  
Power 43 dB  
continuously on  
WALTZ-16 modulated  
DATA PROCESSING  
Line broadening 1.0 Hz  
FT size 65536  
Total time 51 min

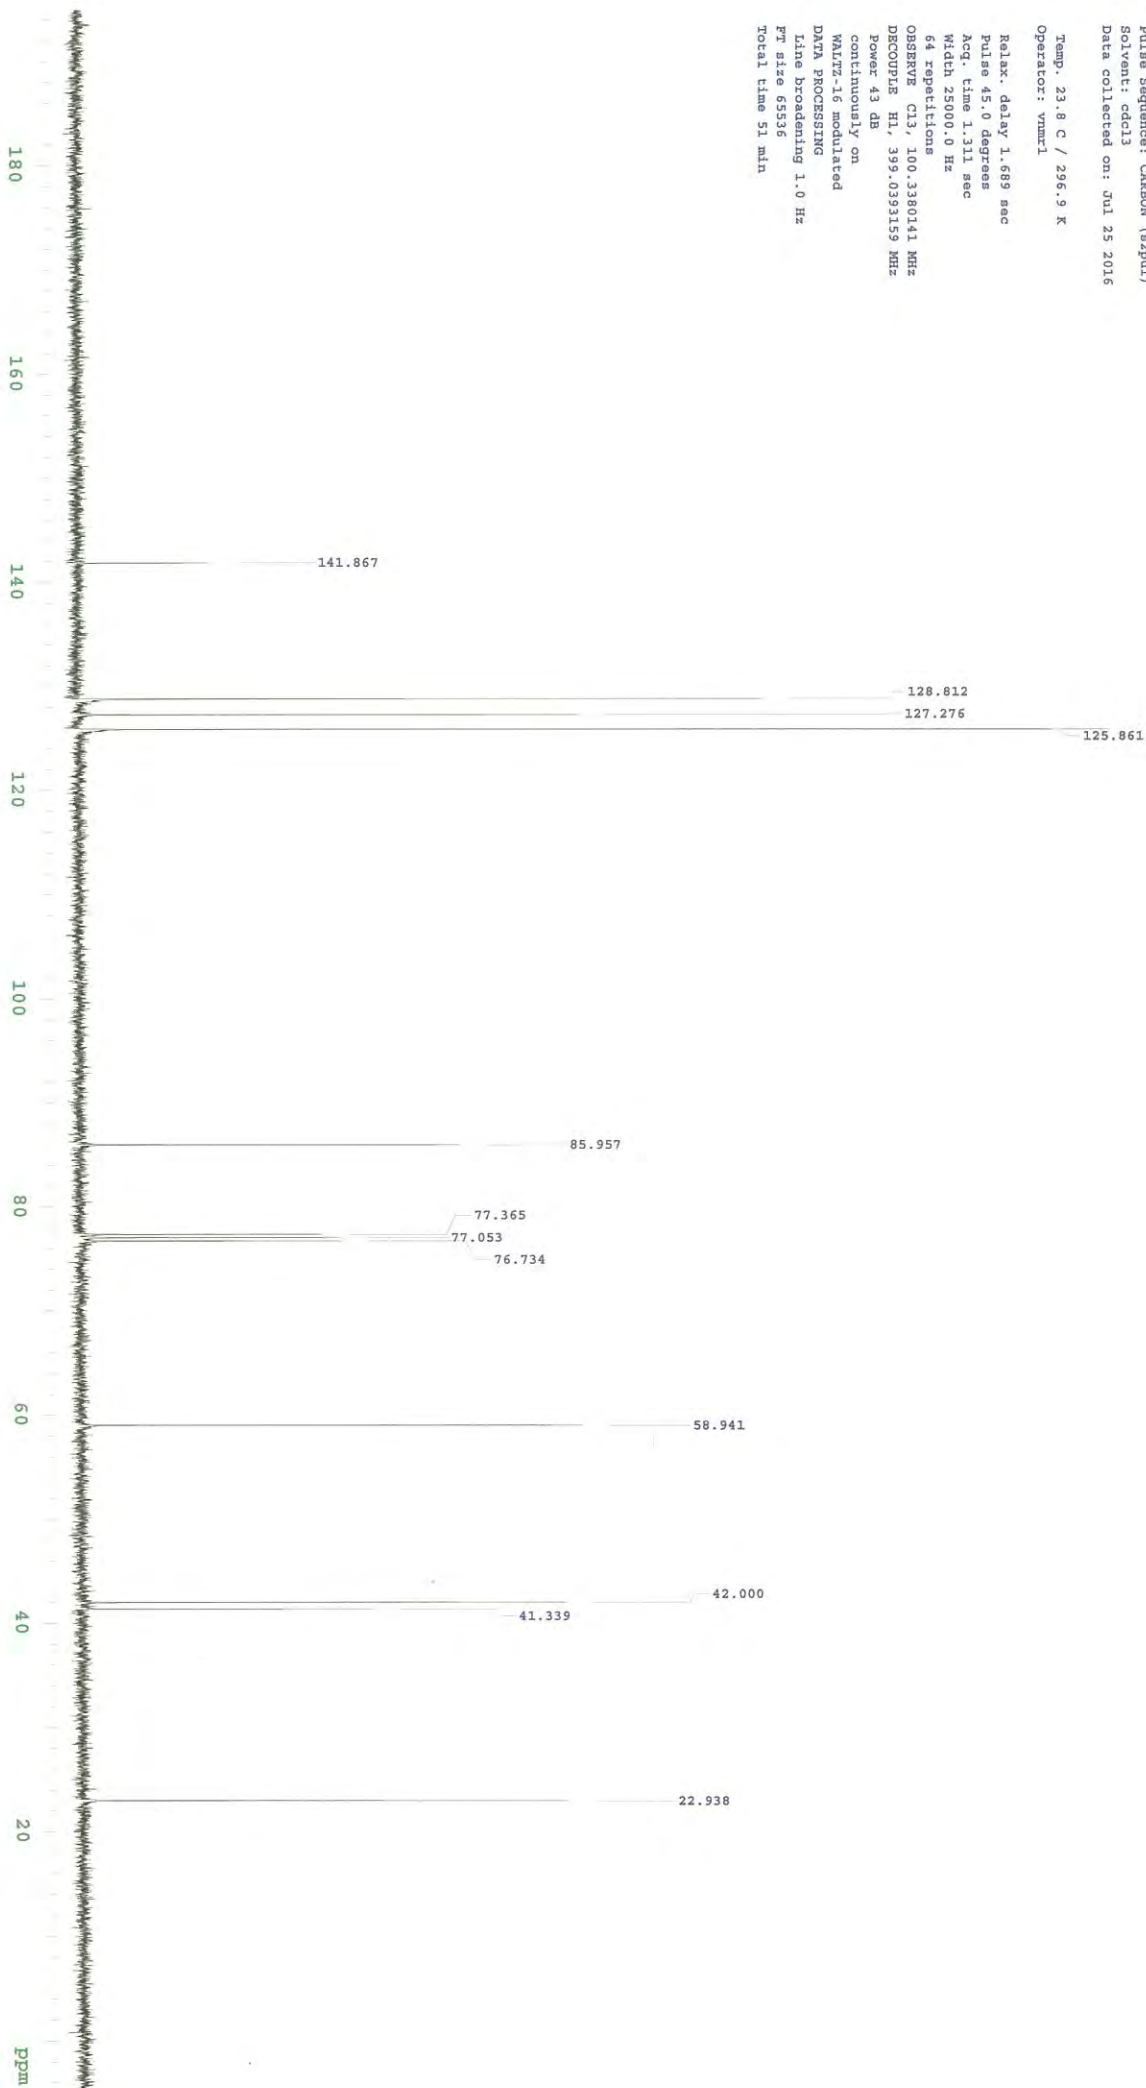

Sample Name:

Data Collected on:  
Agilent-NMR-vnmr-400  
Archive directory:

Sample directory:

FIDFile: PROTON

Pulse Sequence: PROTON (2p1)  
Solvent: cdcl3  
Data collected on: Jul 25 2016

Operator: vnmr1

Relax. delay 1.500 sec  
Pulse 45.0 degrees  
Acq. time 3.500 sec  
Width 6377.6 Hz  
8 repetitions  
OBSERVE H1, 399.0373207 MHz  
DATA PROCESSING  
Line broadening 0.2 Hz  
FT size 65536  
Total time 0 min 40 sec

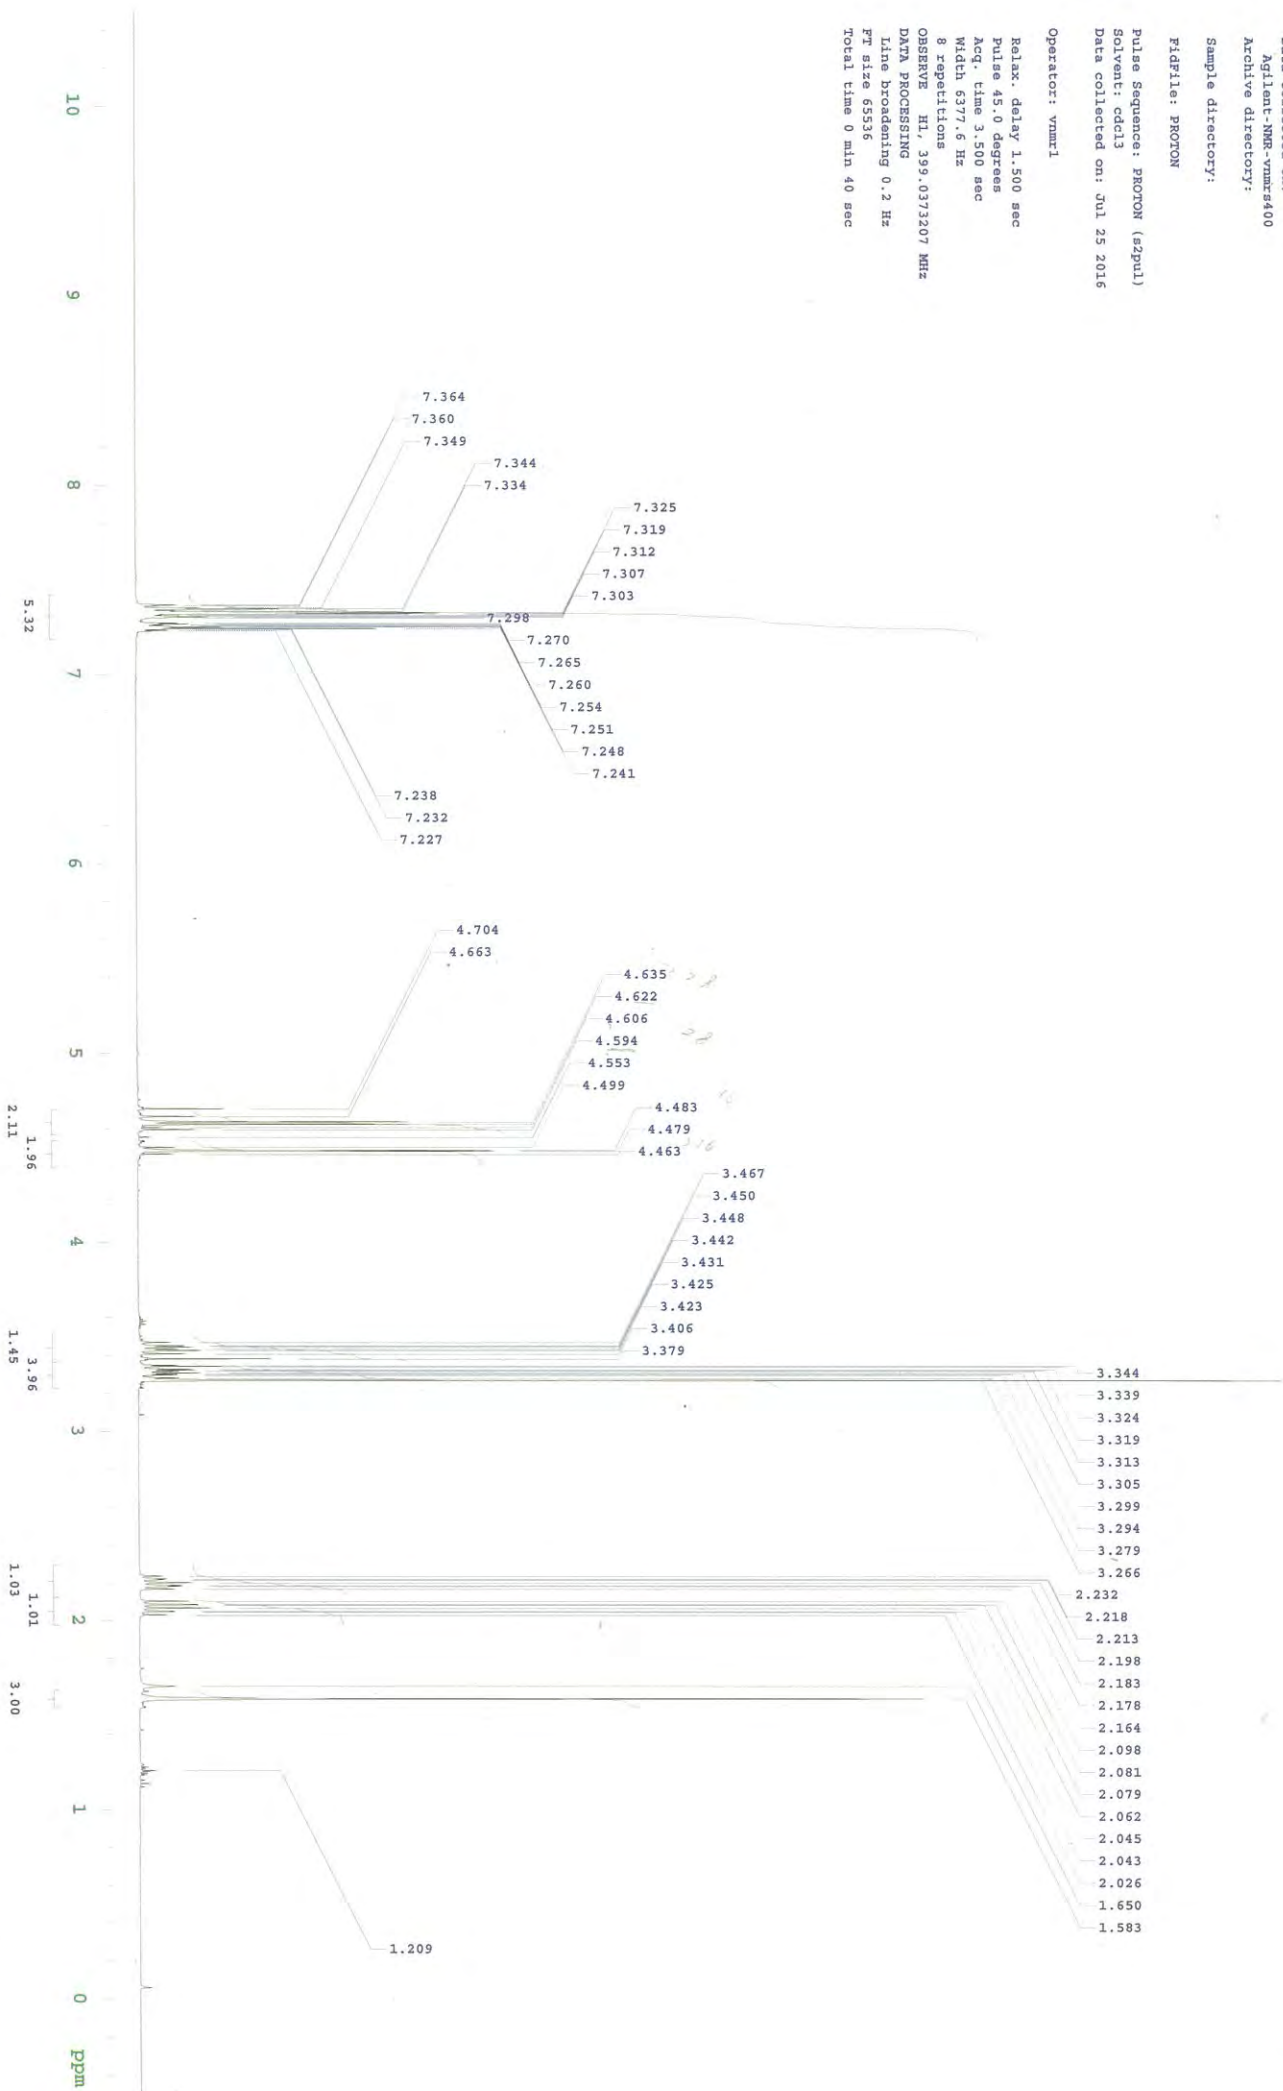

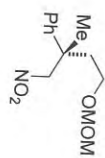

Sample Name:

Data Collected on:  
Agilent-NMR-vnmr5400  
Archive directory:

Sample directory:

FIDFile: CARBON

Pulse Sequence: CARBON (zgpg3)  
Solvent: cdcl3  
Data collected on: Jul 25 2016

Operator: vnmr1

Relax. delay 1.689 sec  
Pulse 45.0 degrees  
Acq. time 1.311 sec  
Width 25000.0 Hz  
64 repetitions  
OBSERVE C13, 100.380141 MHz  
DECOUPLE H1, 399.039159 MHz  
Power 43 dB  
continuously on  
WALTZ-16 modulated  
DATA PROCESSING  
Line broadening 1.0 Hz  
FT size 65536  
Total time 51 min

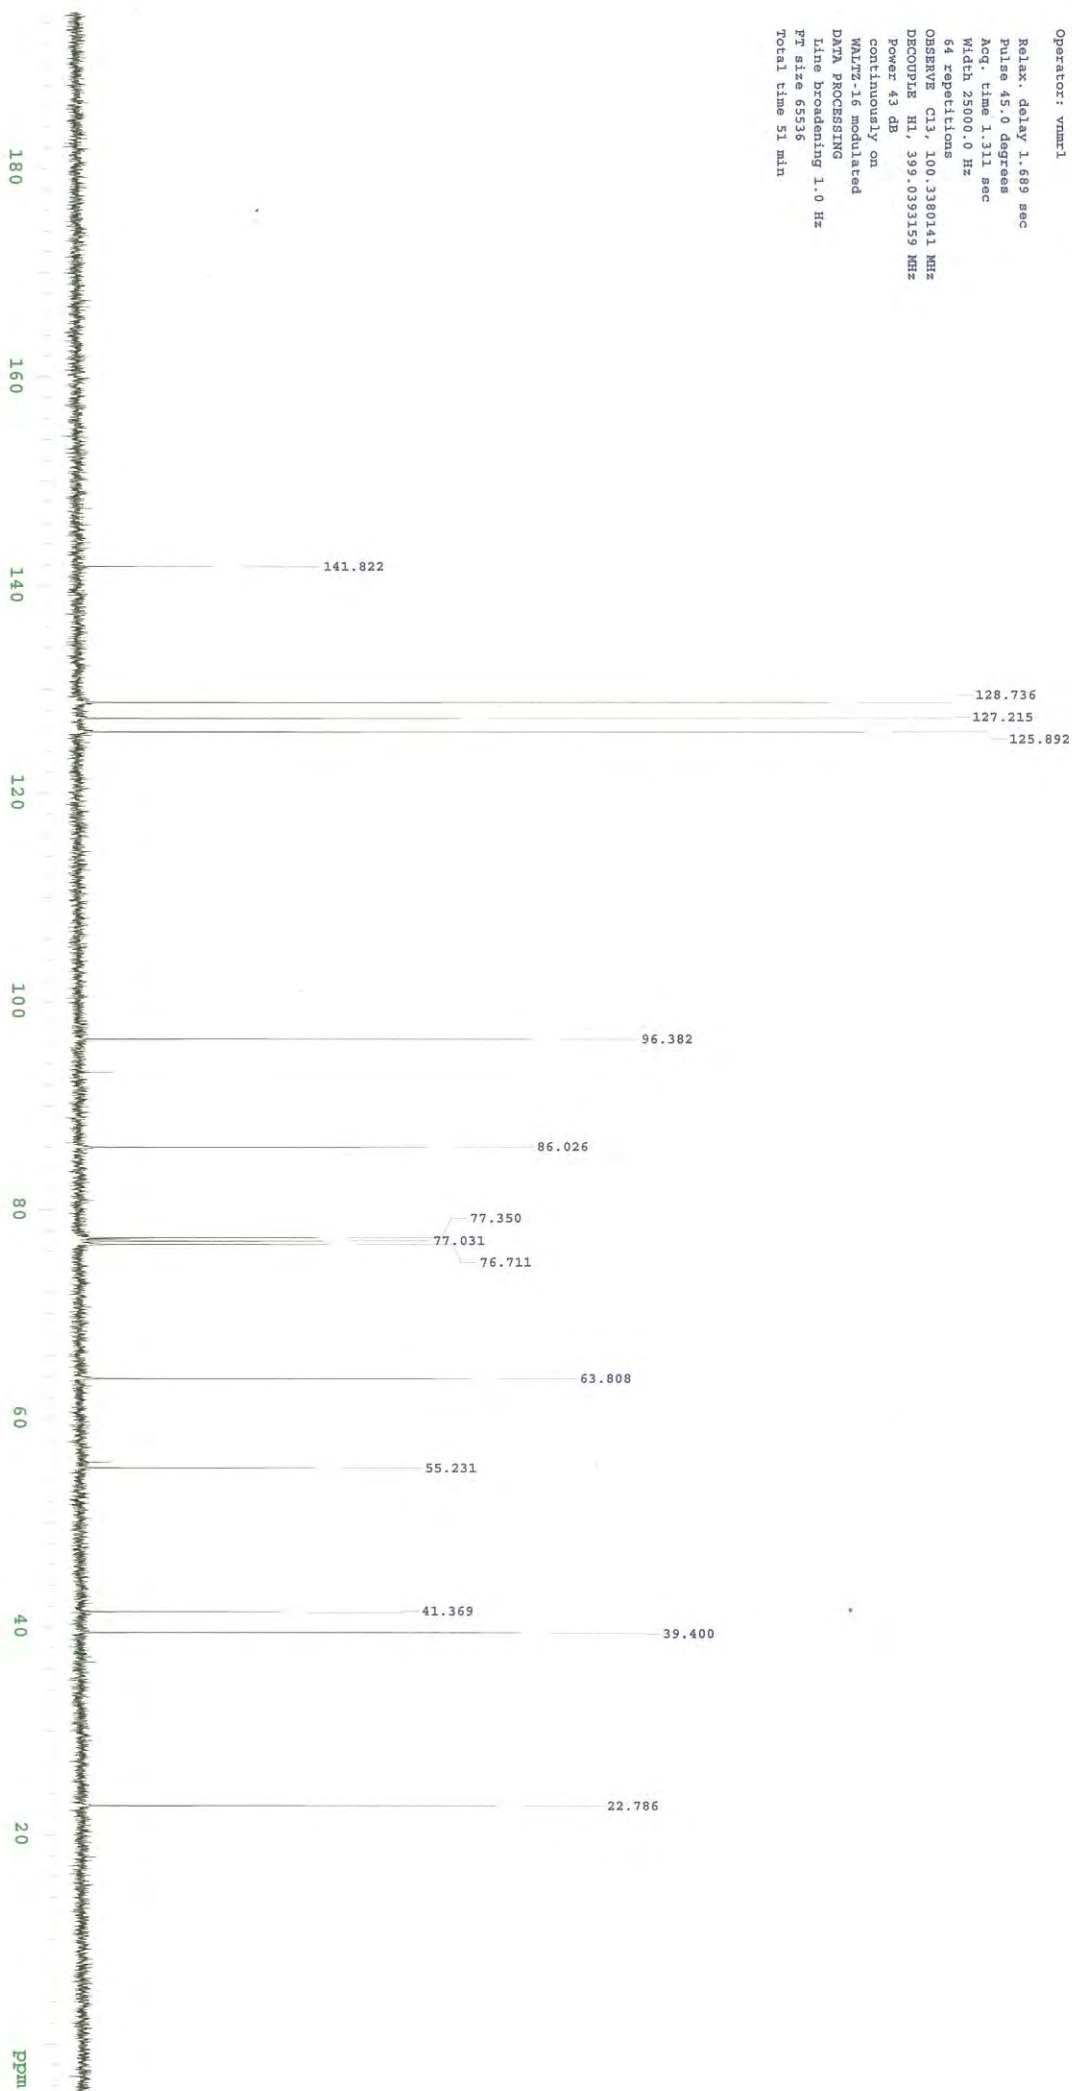

Selective band center: 3.92 (ppm) ; width: 47.9 (Hz)

Sample Name:

Data Collected on:  
Agilent-NMR-vnmr400  
Archive directory:

Sample directory:

Fidfile: 78-pure-ester-13C

Pulse Sequence: PROTON (a2pu1)

Solvent: cdcl3

Data collected on: Nov 27 2015

Operator: ymmr1

Relax. delay 1.500 sec

Pulse 45.0 degrees

Acq. time 3.500 sec

Width 6377.6 Hz

8 repetitions

OBSERVE H1, 399.0373207 MHz

DATA PROCESSING

Line broadening 0.2 Hz

FT size 65536

Total time 0 min 40 sec

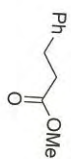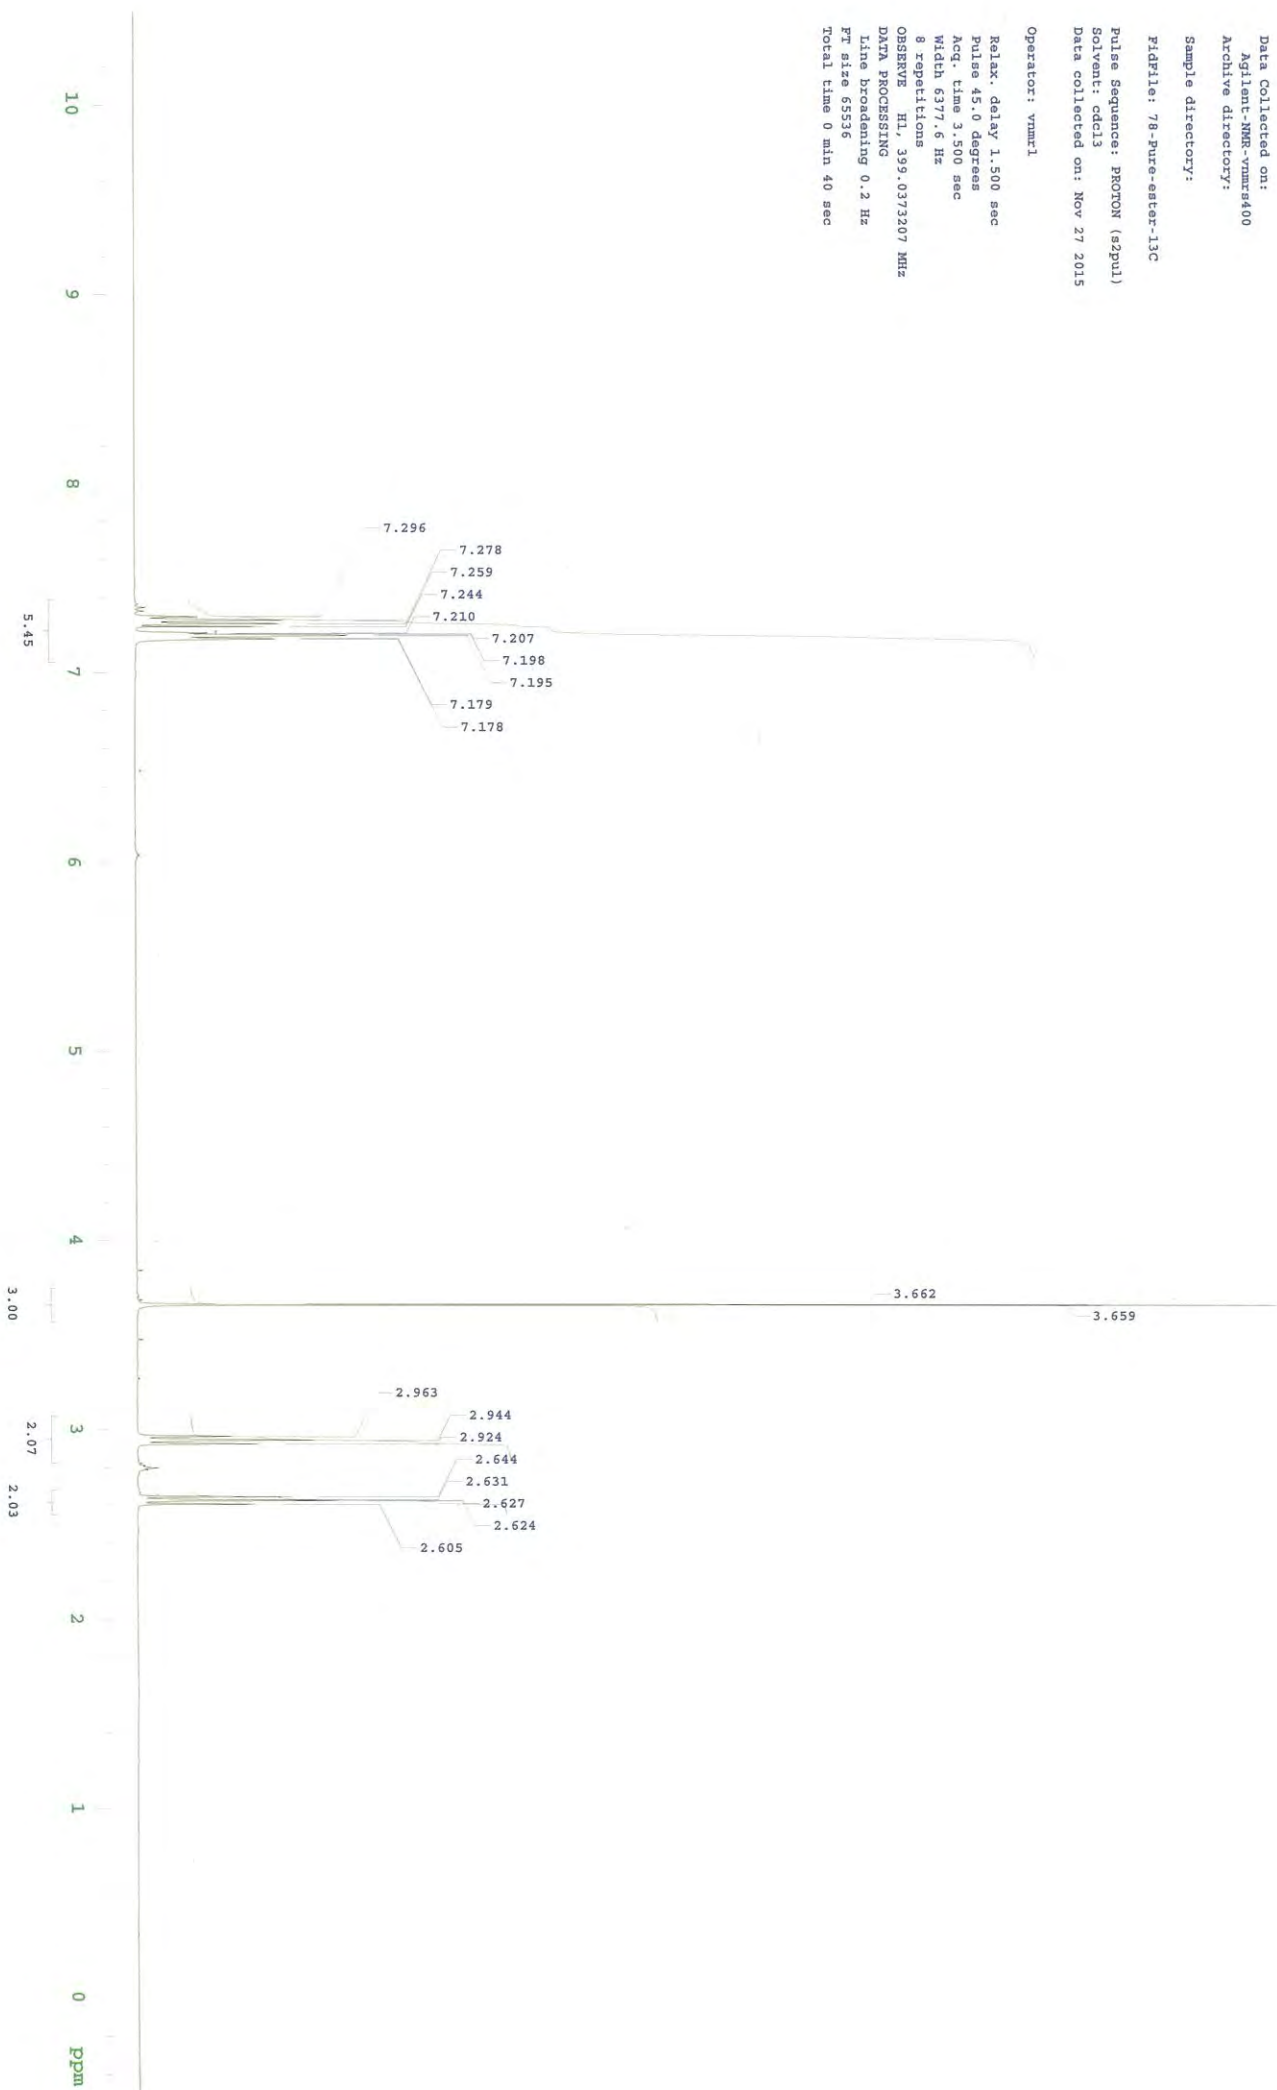

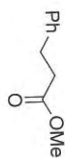

Selective band center: 3.92 (ppm); width: 47.9 (Hz)

Sample Name:

Data Collected on:  
Agilent-NMR-vnmr400  
Archive directory:

Sample directory:

Fidfile: 78-Pure-ester-13-2C

Pulse Sequence: CARBON (zgpg3)

Solvent: cdcl3  
Data collected on: Nov 27 2015

Operator: ynmr1

Relax. delay 1.689 sec

Pulse 45.0 degrees

Acq. time 1.311 sec

Width 25000.0 Hz

64 repetitions

OBSERVE C13, 100.3380141 MHz

DECOUPLE H1, 399.0393159 MHz

Power 43 dB

continuously on

WALTZ-16 modulated

DATA PROCESSING

Line broadening 1.0 Hz

FT size 65536

Total time 51 min

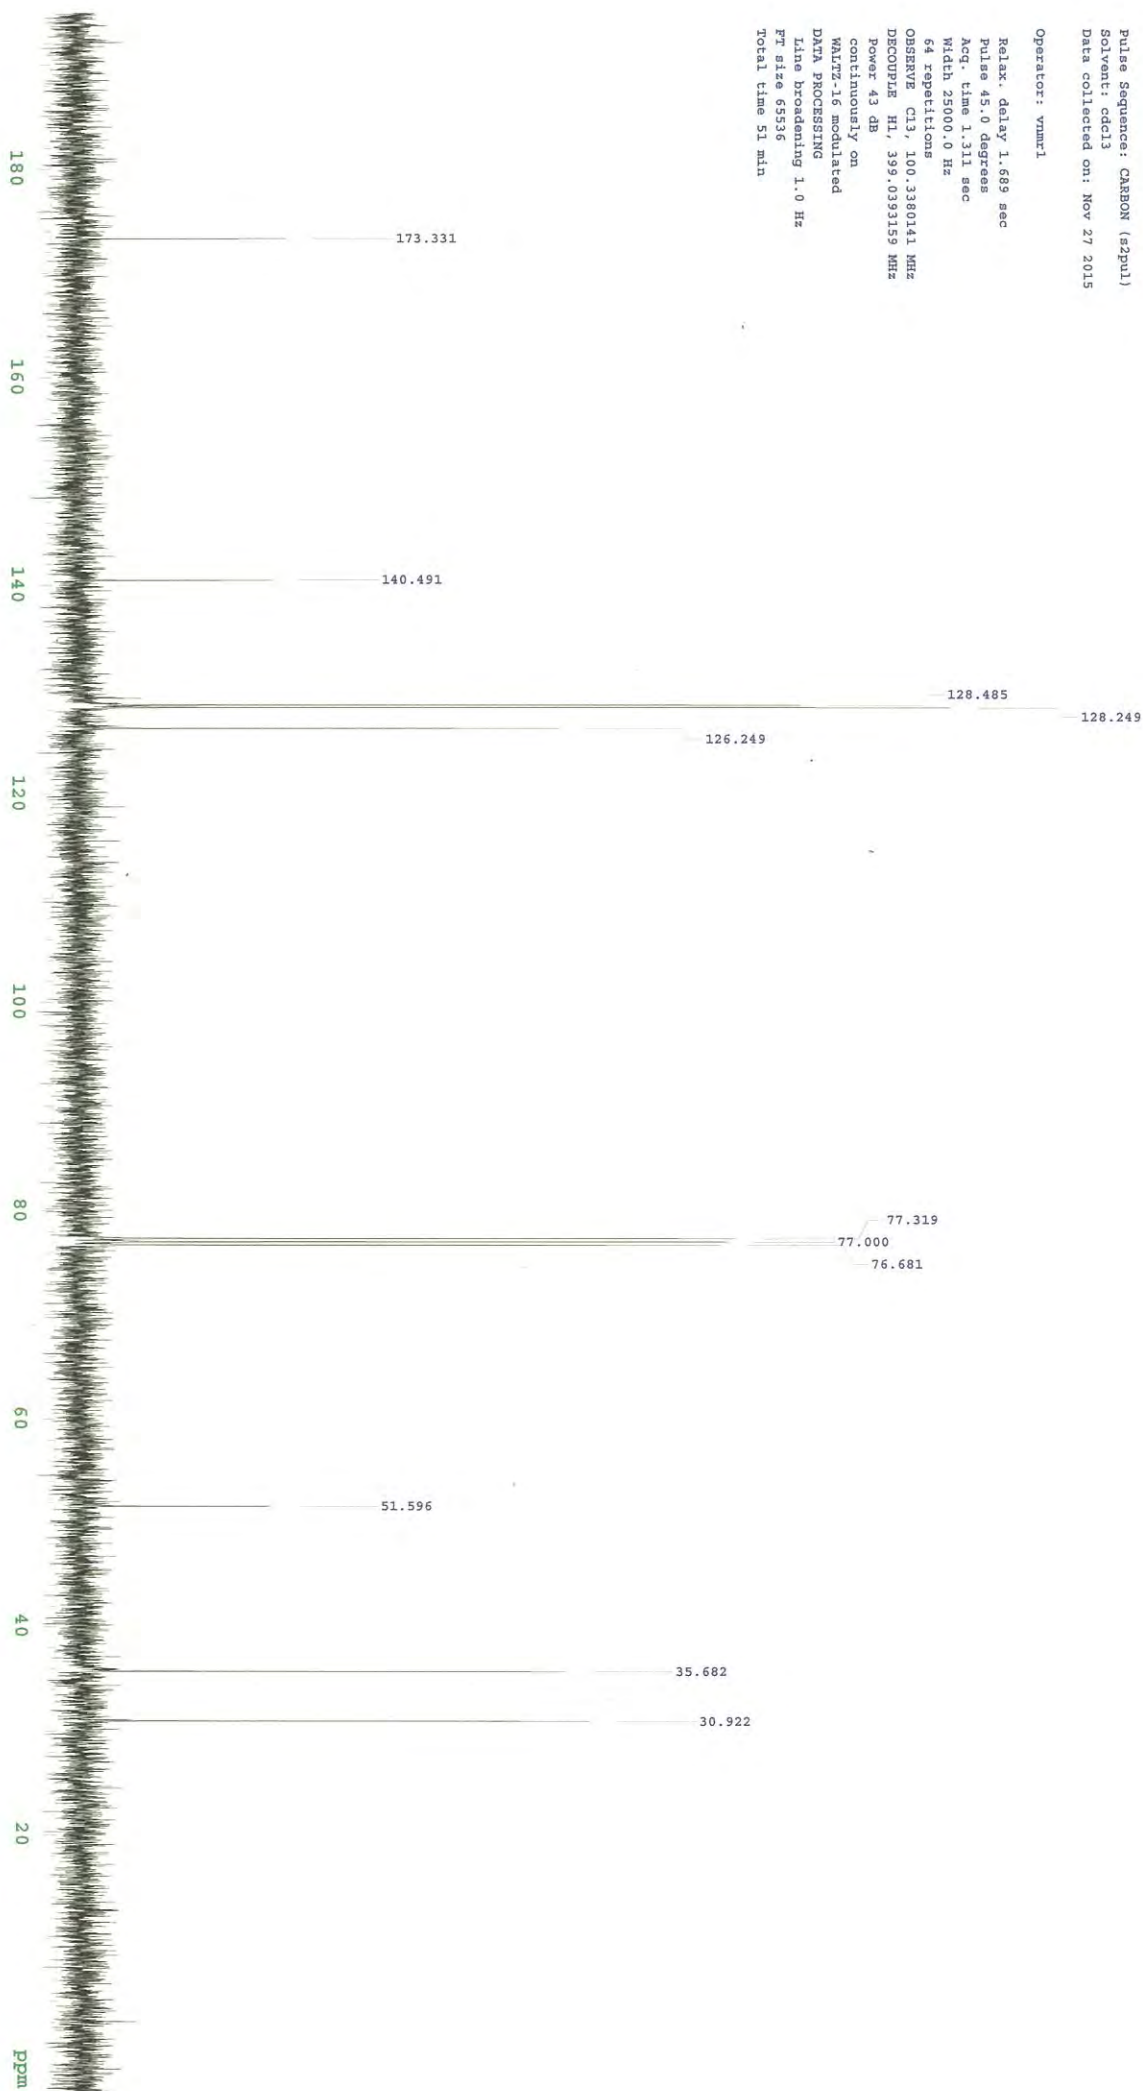



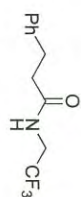

Sample Name:

Data Collected on:  
Agilent-NMR-vnmr400  
Archive directory:

Sample directory:

F1dFile: PROTON

Pulse Sequence: PROTON (zgpg3)

Solvent: cdcl3  
Data collected on: Jul 18 2016

Operator: vnmr1

Relax. delay 1.500 sec  
Pulse 45.0 degrees

Acq. time 3.500 sec  
Width 6377.6 Hz

8 repetitions

OBSERVE H1, 399.0373207 MHz  
DATA PROCESSING

Line broadening 0.2 Hz  
FT size 65536

Total time 0 min 40 sec

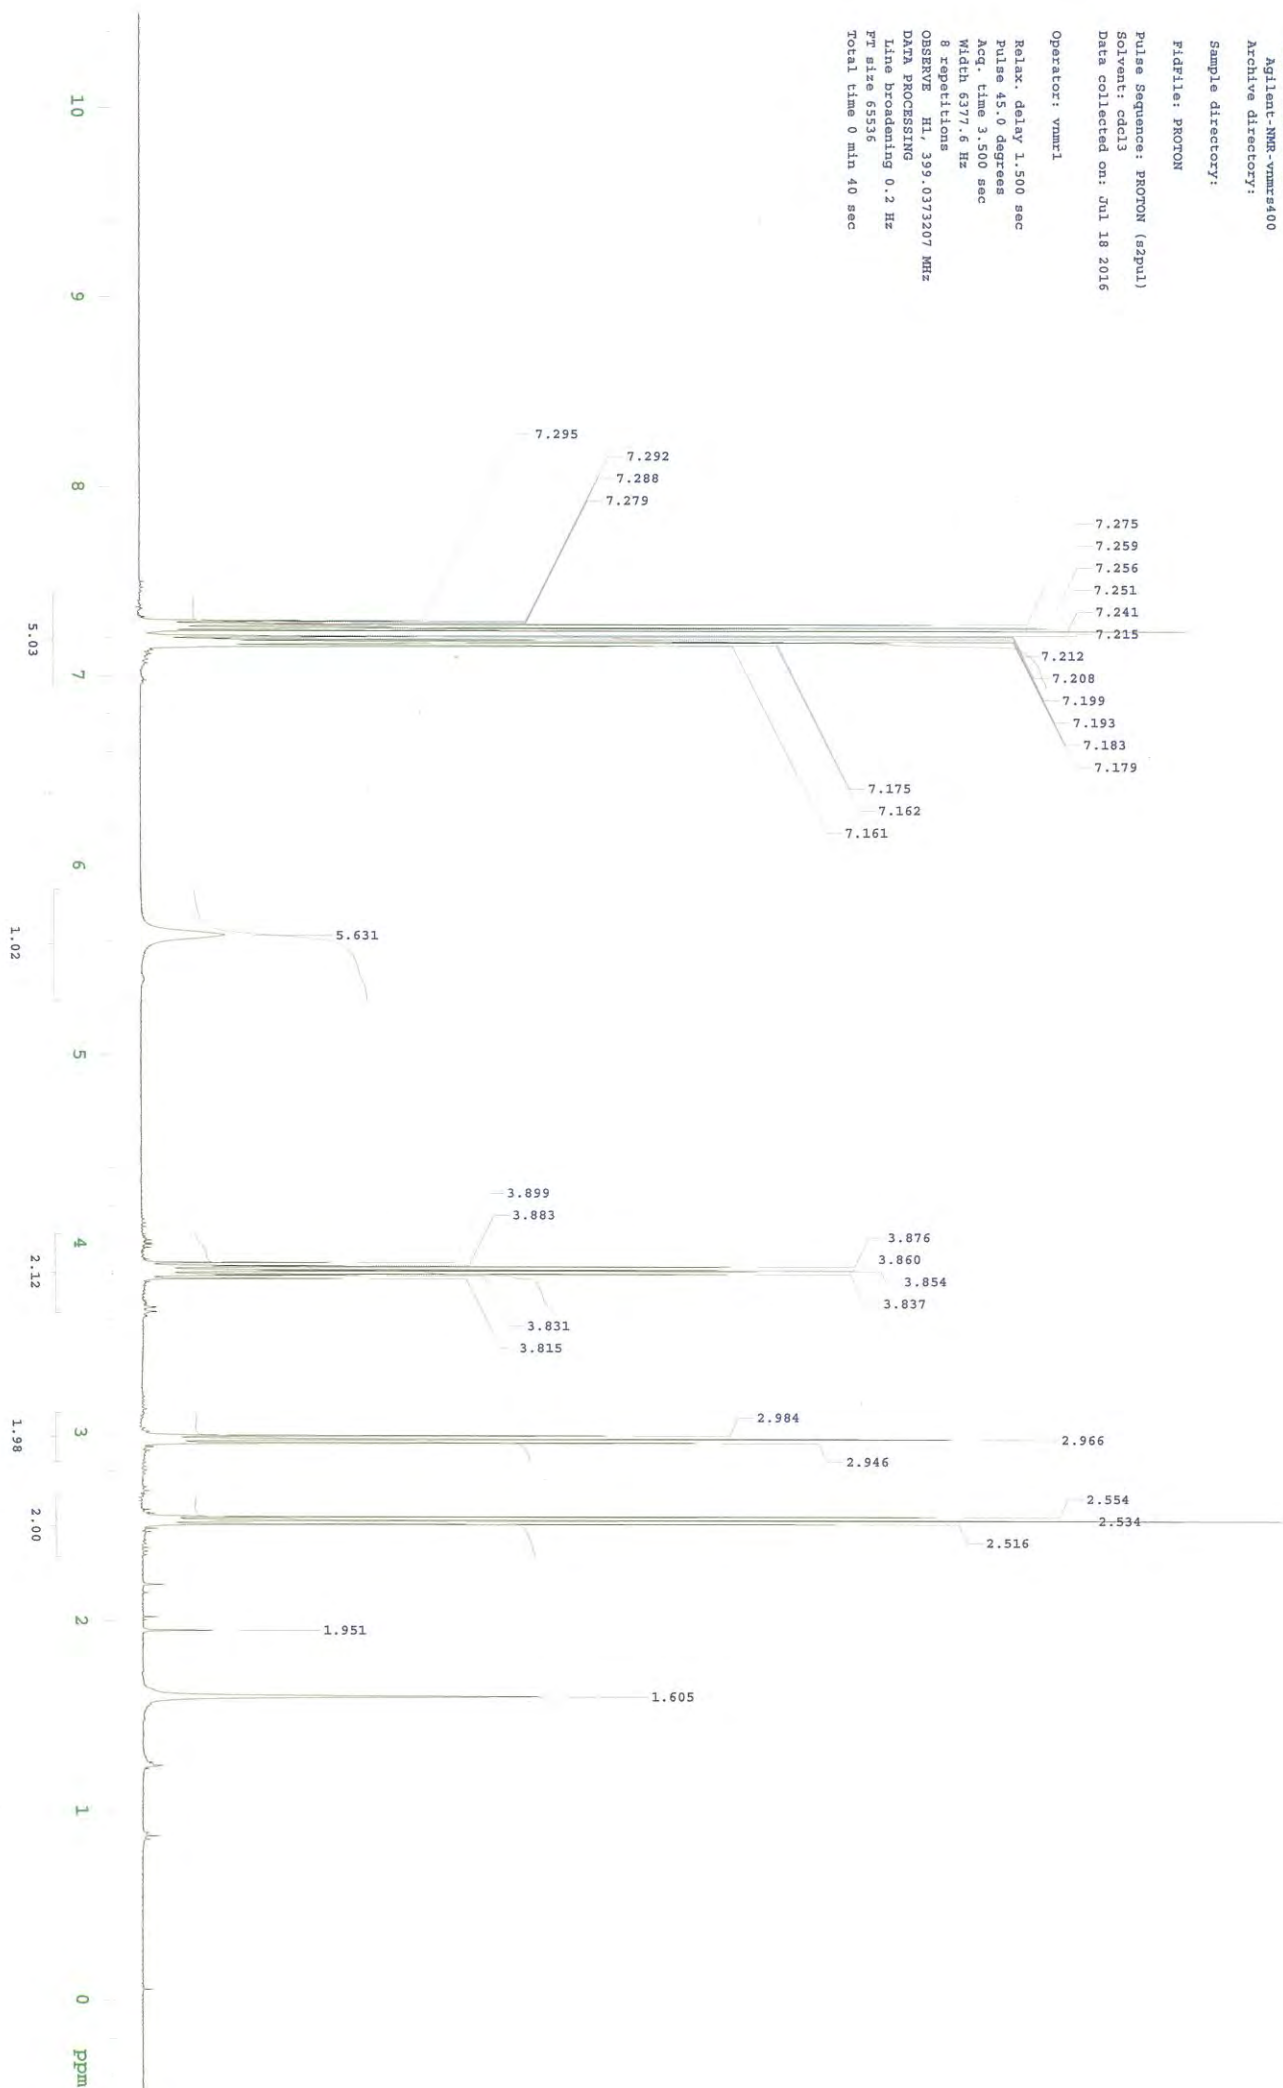

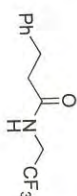

Sample Name:

Data Collected on:  
Agilent-NMR-vnmr400  
Archive directory:

Sample directory:

FidFile: 157-trifluoroethylamine-13C-2

Pulse Sequence: CARBON (s2pul)  
Solvent: cdcl3  
Data collected on: Jul 18 2016

Operator: vnmr1

Relax. delay 1.689 sec  
Pulse 45.0 degrees  
Acq. time 1.311 sec  
Width 25000.0 Hz  
10240 repetitions  
OBSERVE C13, 100.3380141 MHz  
DECOUPLE H1, 399.0393159 MHz  
Power 43 dB  
continuously on  
WALTZ-16 modulated  
DATA PROCESSING  
Line broadening 1.0 Hz  
FT size 65536  
Total time 8 hr, 32 min

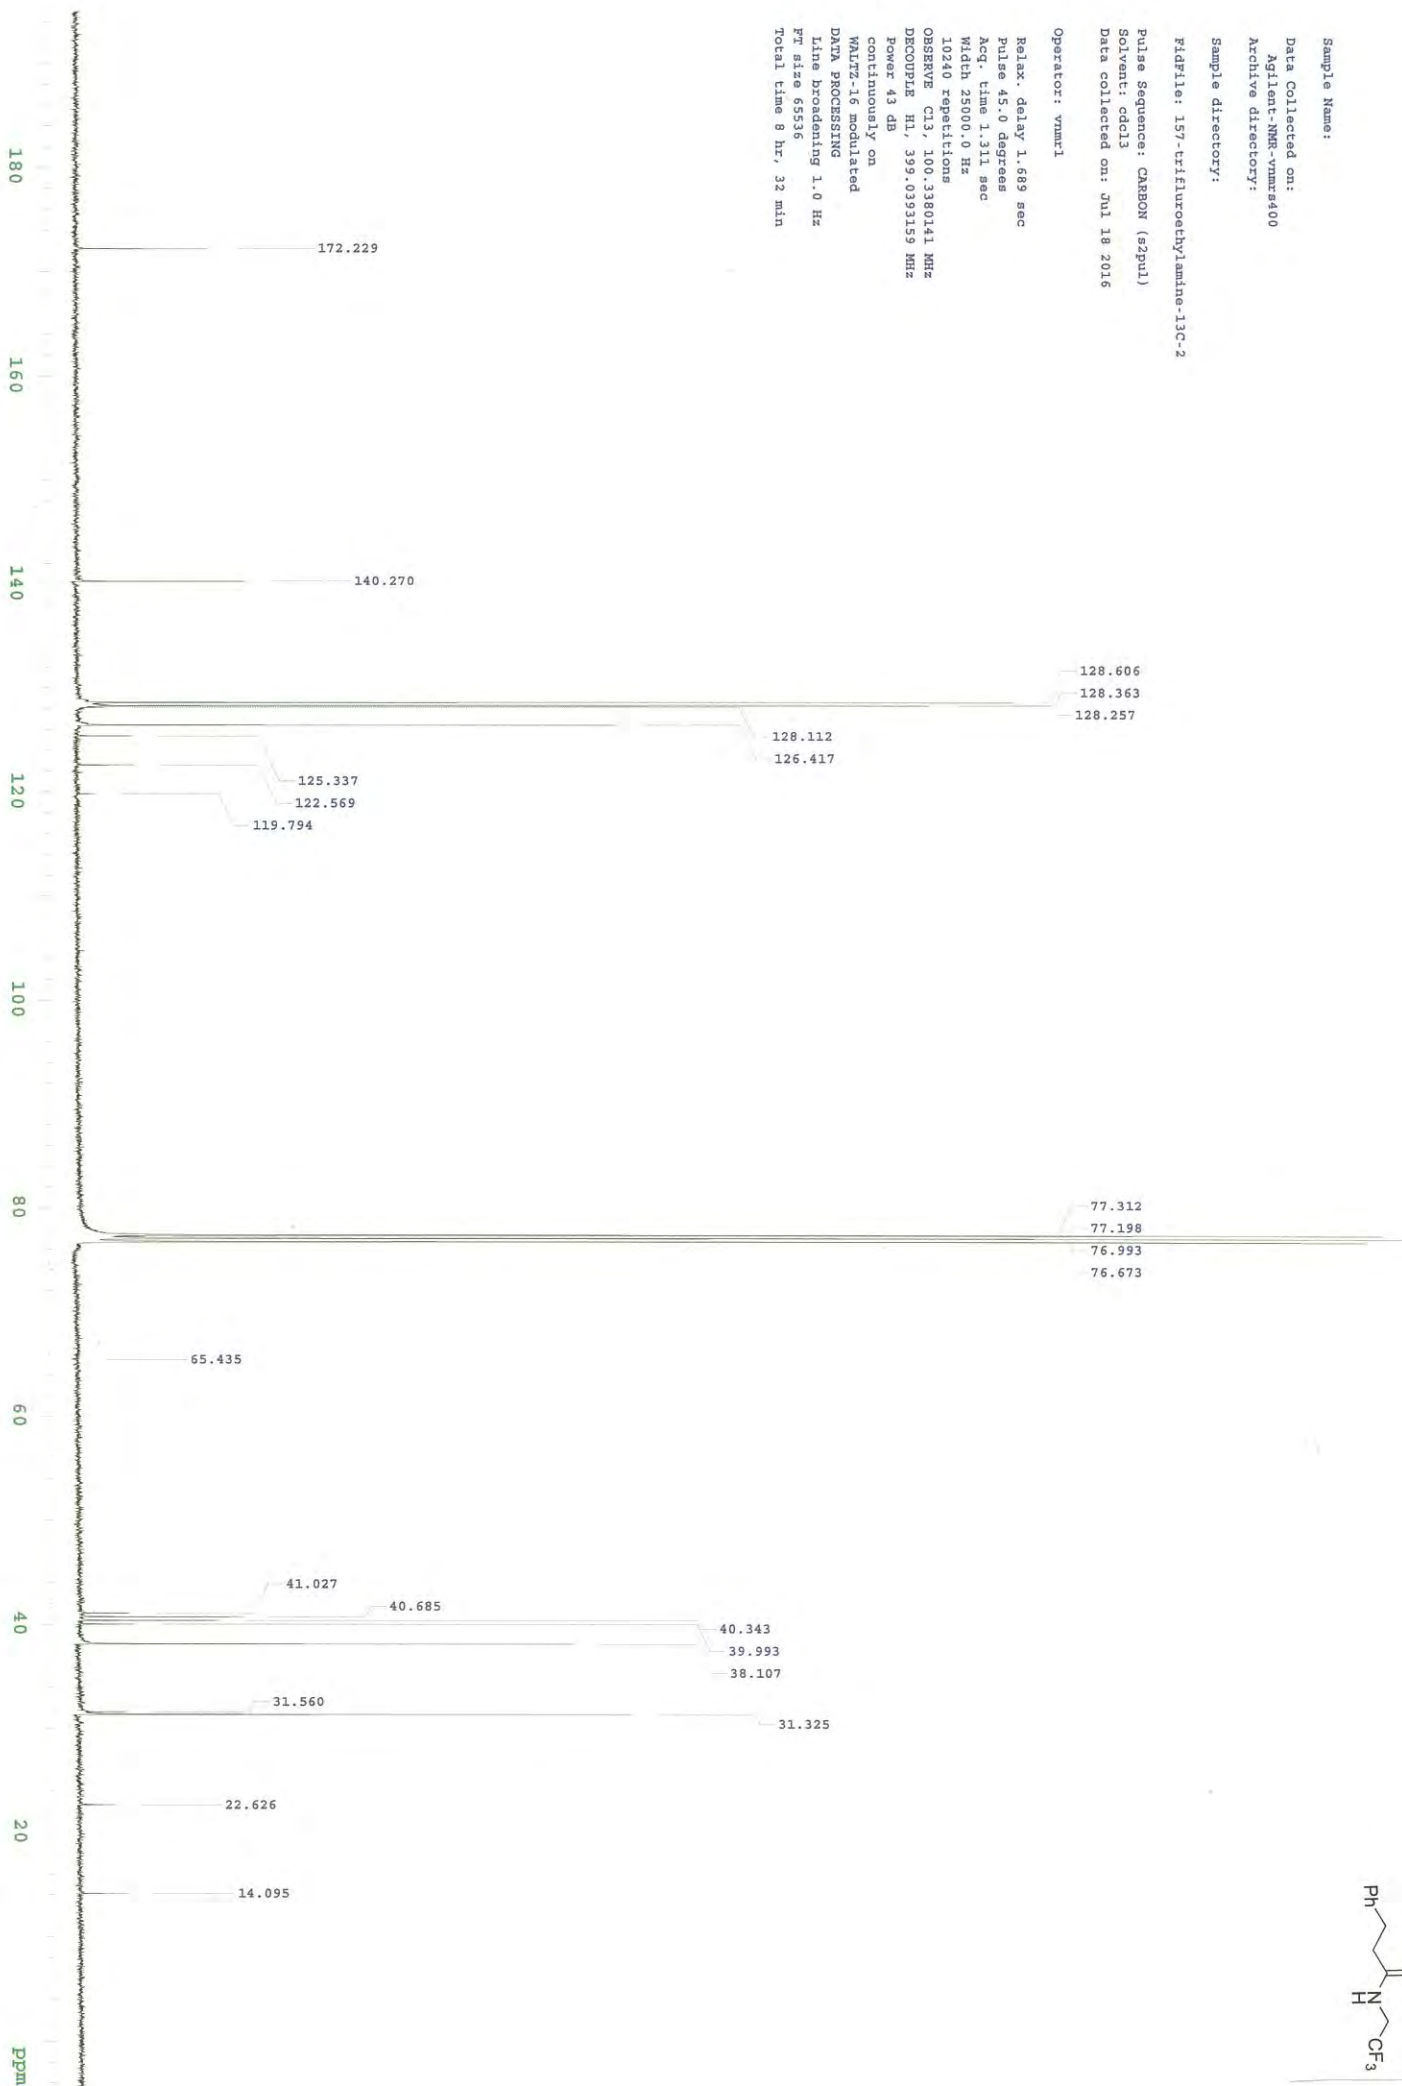

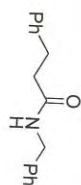

Sample Name:

Data Collected on:  
 Agilent-NMR-vnmr400  
 Archive directory:

Sample directory:

FIDFile: PROTON

Pulse Sequence: PROTON (zgpg3)  
 Solvent: cdcl3  
 Data collected on: Jul 18 2016

Operator: vnmr1

Relax. delay 1.500 sec  
 Pulse 45.0 degrees  
 Acq. time 3.500 sec  
 Width 6377.6 Hz  
 8 repetitions  
 OBSERVE H1, 399.0373207 MHz  
 DATA PROCESSING  
 Line broadening 0.2 Hz  
 FT size 65536  
 Total time 0 min 40 sec

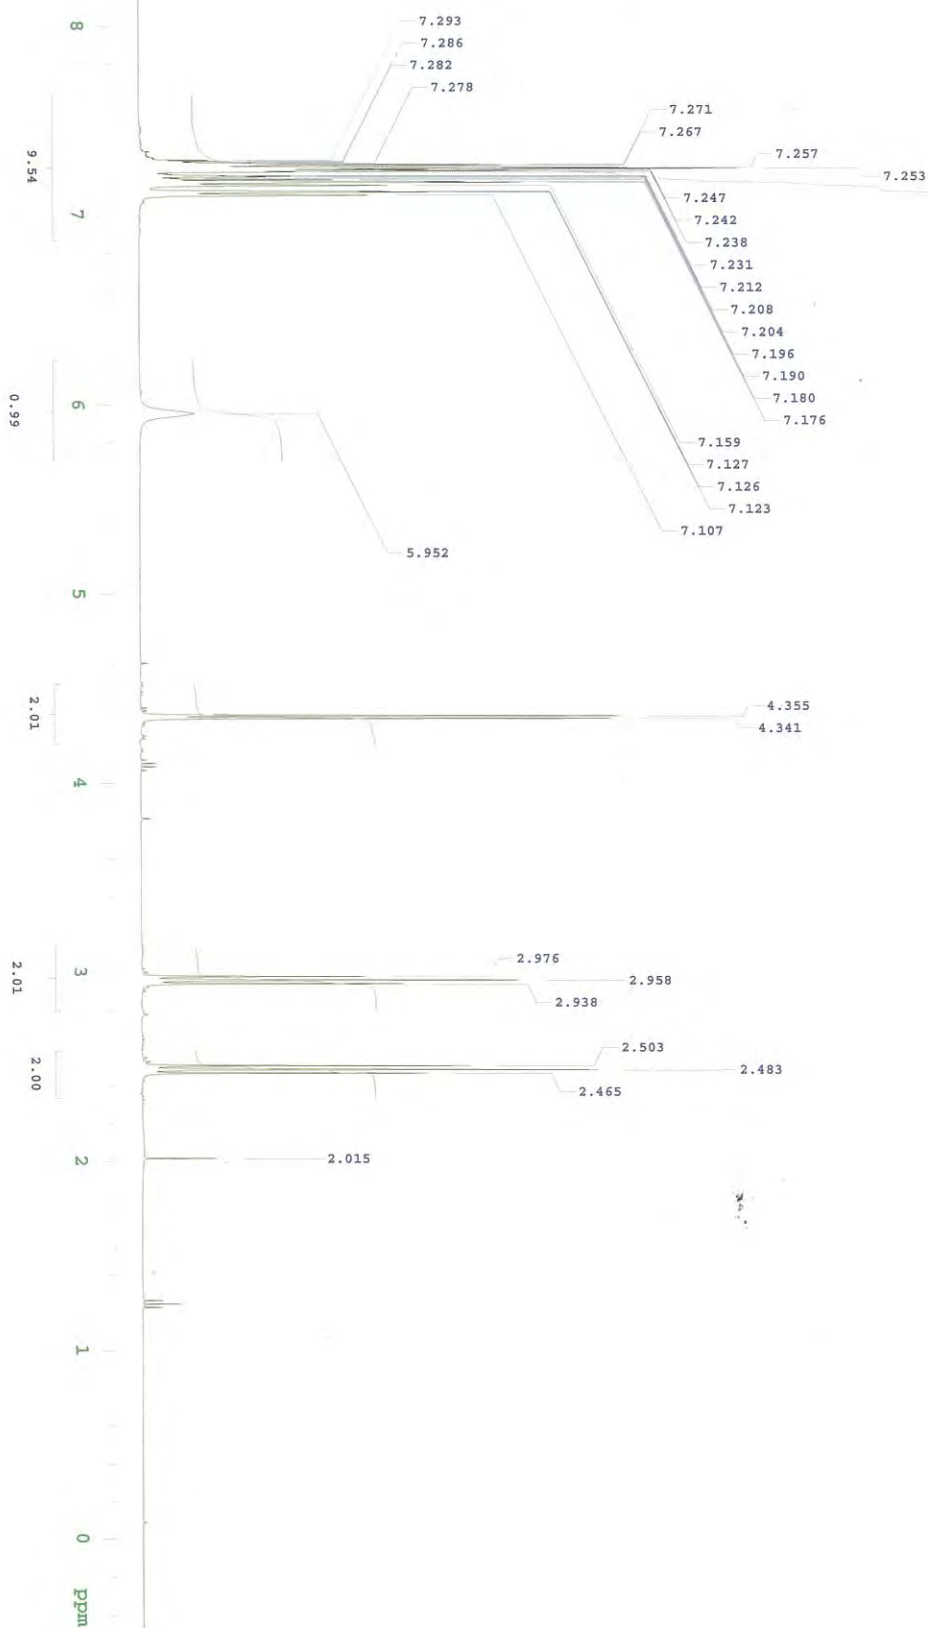

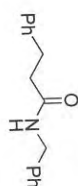

Sample Name:

Data Collected on:  
Agilent-NMR-vnmrs400  
Archive directory:

Sample directory:

FIDFile: CARBON

Pulse Sequence: CARBON (zgpg3)  
Solvent: cdcl3  
Data collected on: Jul 18 2016

Operator: vnmr1

Relax. delay 1.689 sec  
Pulse 45.0 degrees  
Acq. time 1.311 sec  
Width 25000.0 Hz

64 repetitions  
OBSERVE C13, 100.380141 MHz  
DECOUPLE H1, 399.0393159 MHz  
Power 43 dB  
continuously on

WALTZ-16 modulated  
DATA PROCESSING  
Line broadening 1.0 Hz  
FT size 65536  
Total time 51 min

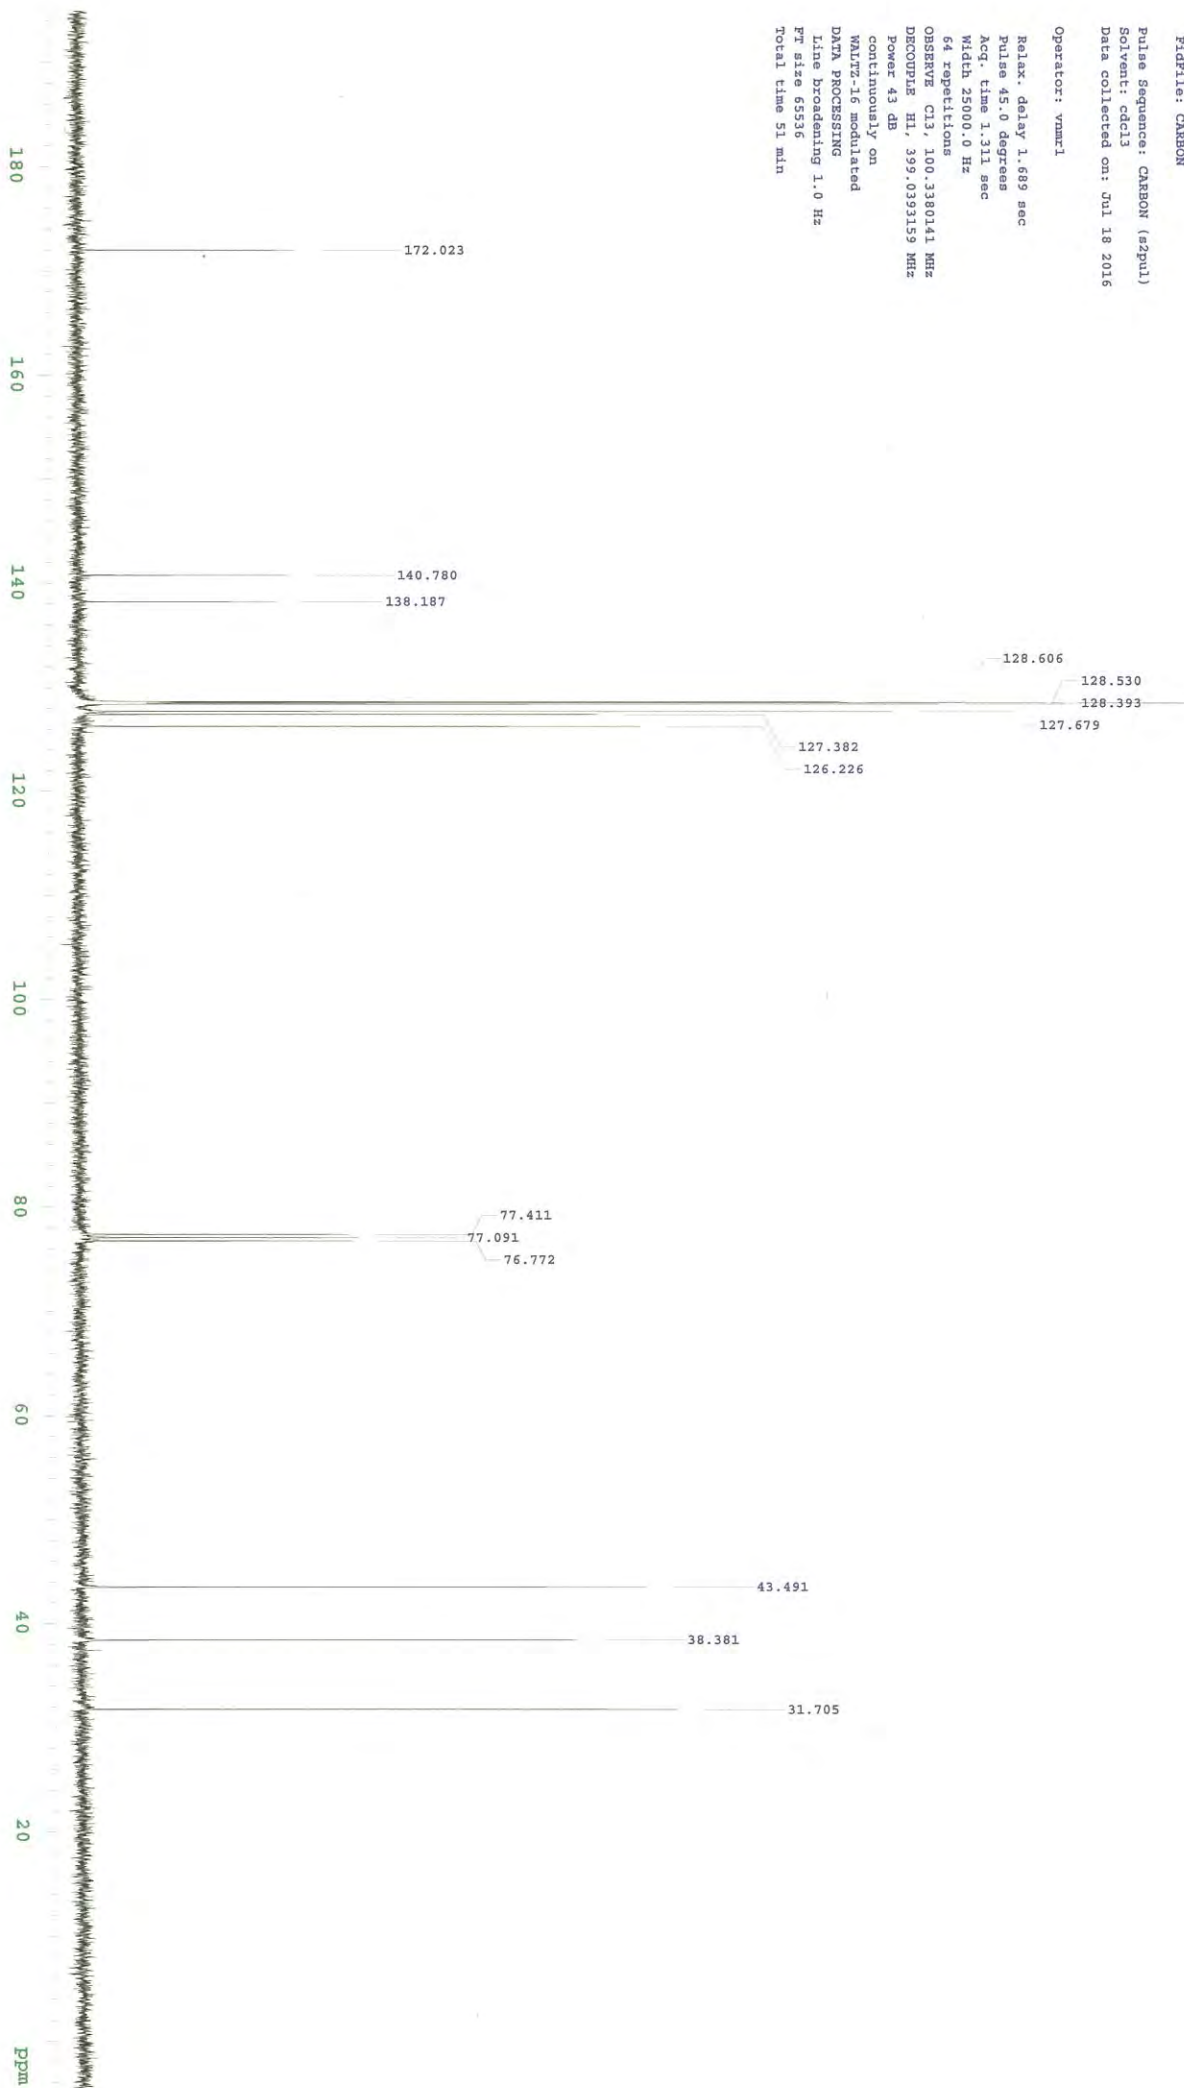

Sample Name:

Data Collected on:  
Agilent-NMR-vnmr400  
Archive directory:

Sample directory:

F1dFile: PROTON

Pulse Sequence: PROTON (zgpg3)  
Solvent: cdcl3  
Data collected on: Jul 20 2016

Operator: vnmr1

Relax. delay 1.500 sec  
Pulse 45.0 degrees  
Acq. time 3.500 sec  
Width 6377.6 Hz  
8 repetitions  
OBSERVE H1, 399.0373207 MHz  
DATA PROCESSING  
Line broadening 0.2 Hz  
FT size 65536  
Total time 0 min 40 sec

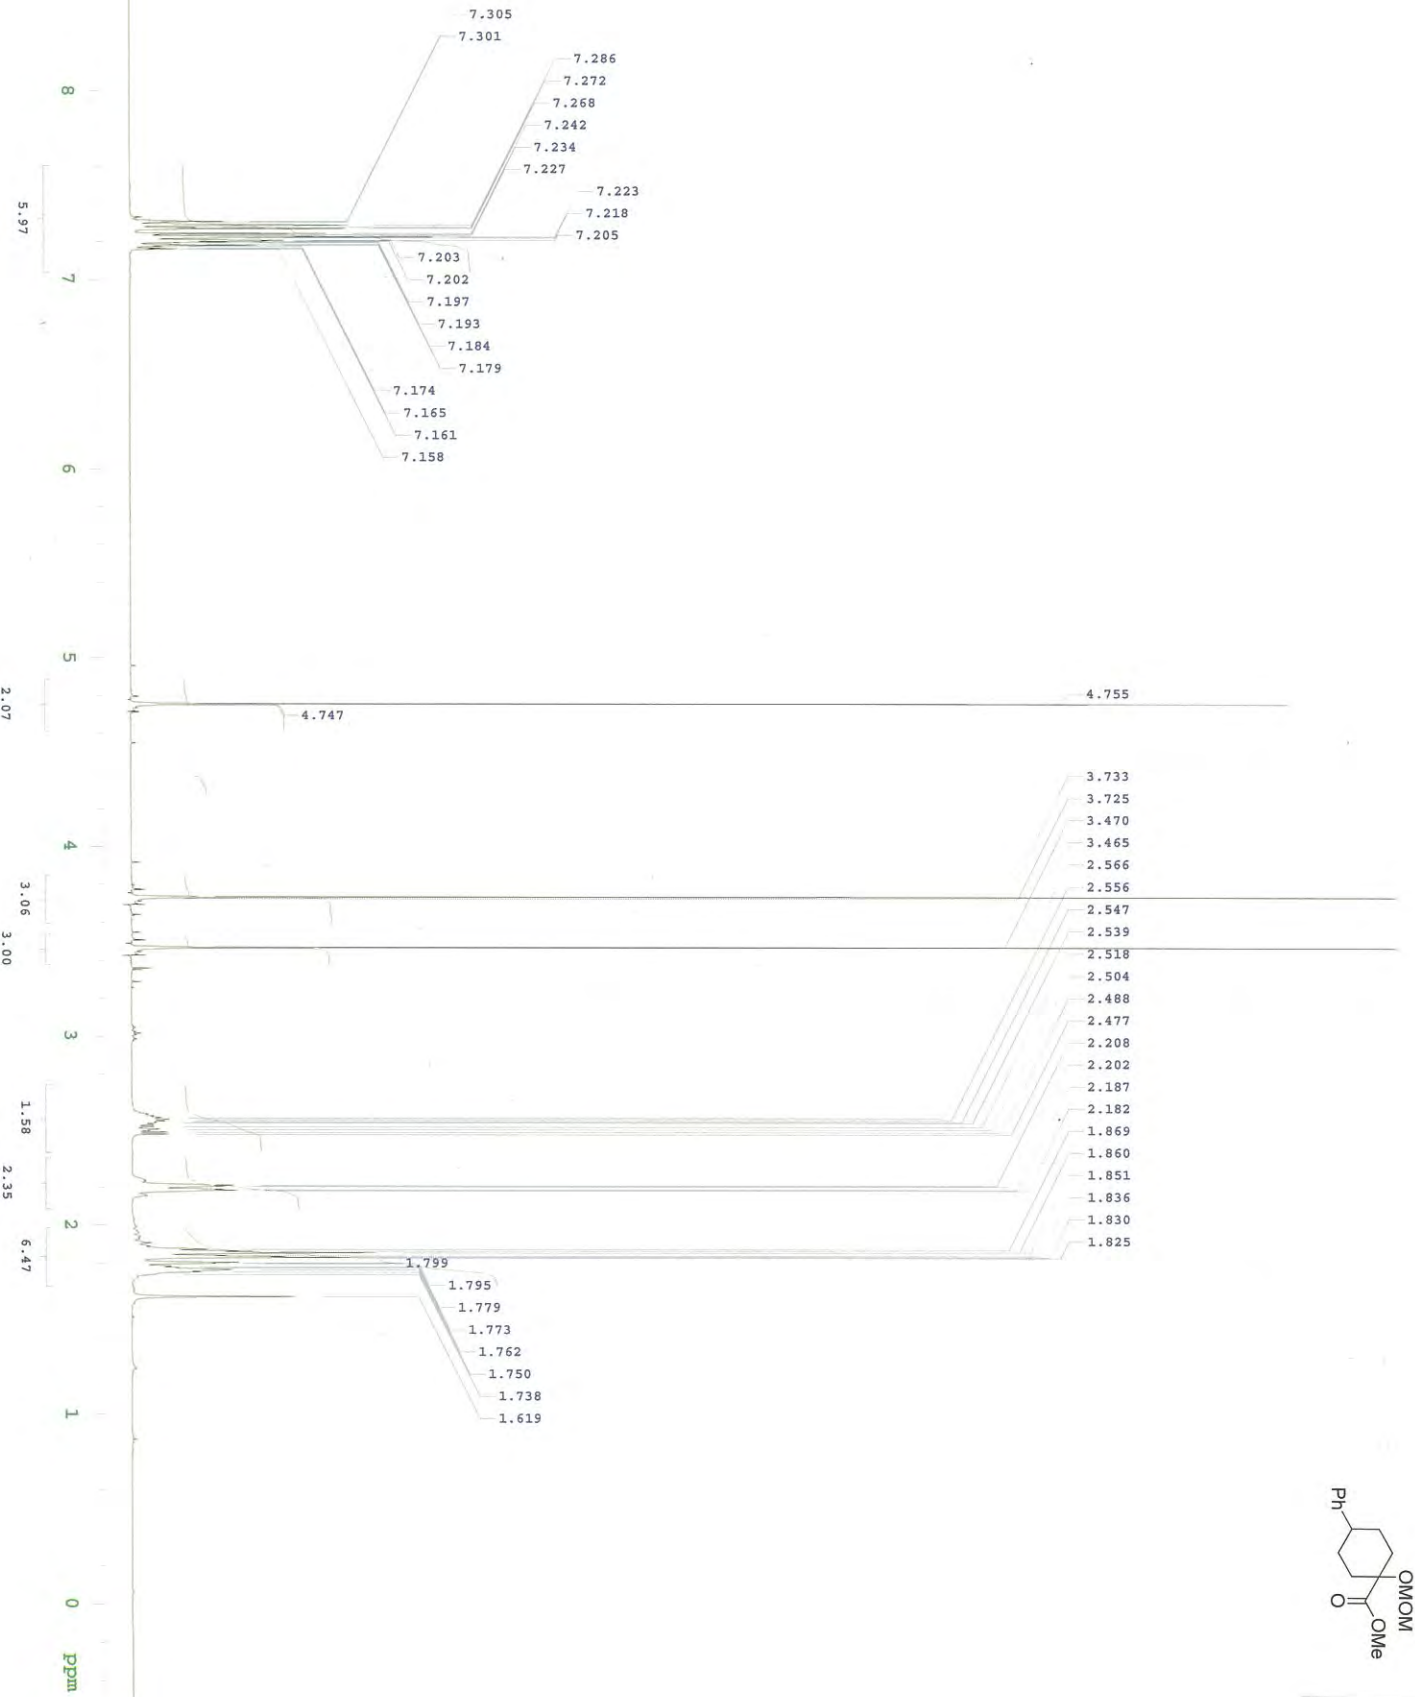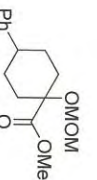

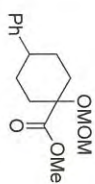

Sample Name:

Data Collected on:  
Agilent-NMR-vnmr400  
Archive directory:

Sample directory:

FIDFile: CARBON

Pulse Sequence: CARBON (zgpg1)  
Solvent: cdcl3  
Data collected on: Jul 20 2016

Operator: vnmr1

Relax. delay 1.689 sec  
Pulse 45.0 degrees  
Acq. time 1.311 sec  
Width 25000.0 Hz  
128 repetitions  
OBSERVE C13, 100.3380141 MHz  
DECOUPLE H1, 399.0393159 MHz  
Power 43 dB  
continuously on  
WALTZ-16 modulated  
DATA PROCESSING  
Line broadening 1.0 Hz  
FT size 65536  
Total time 51 min

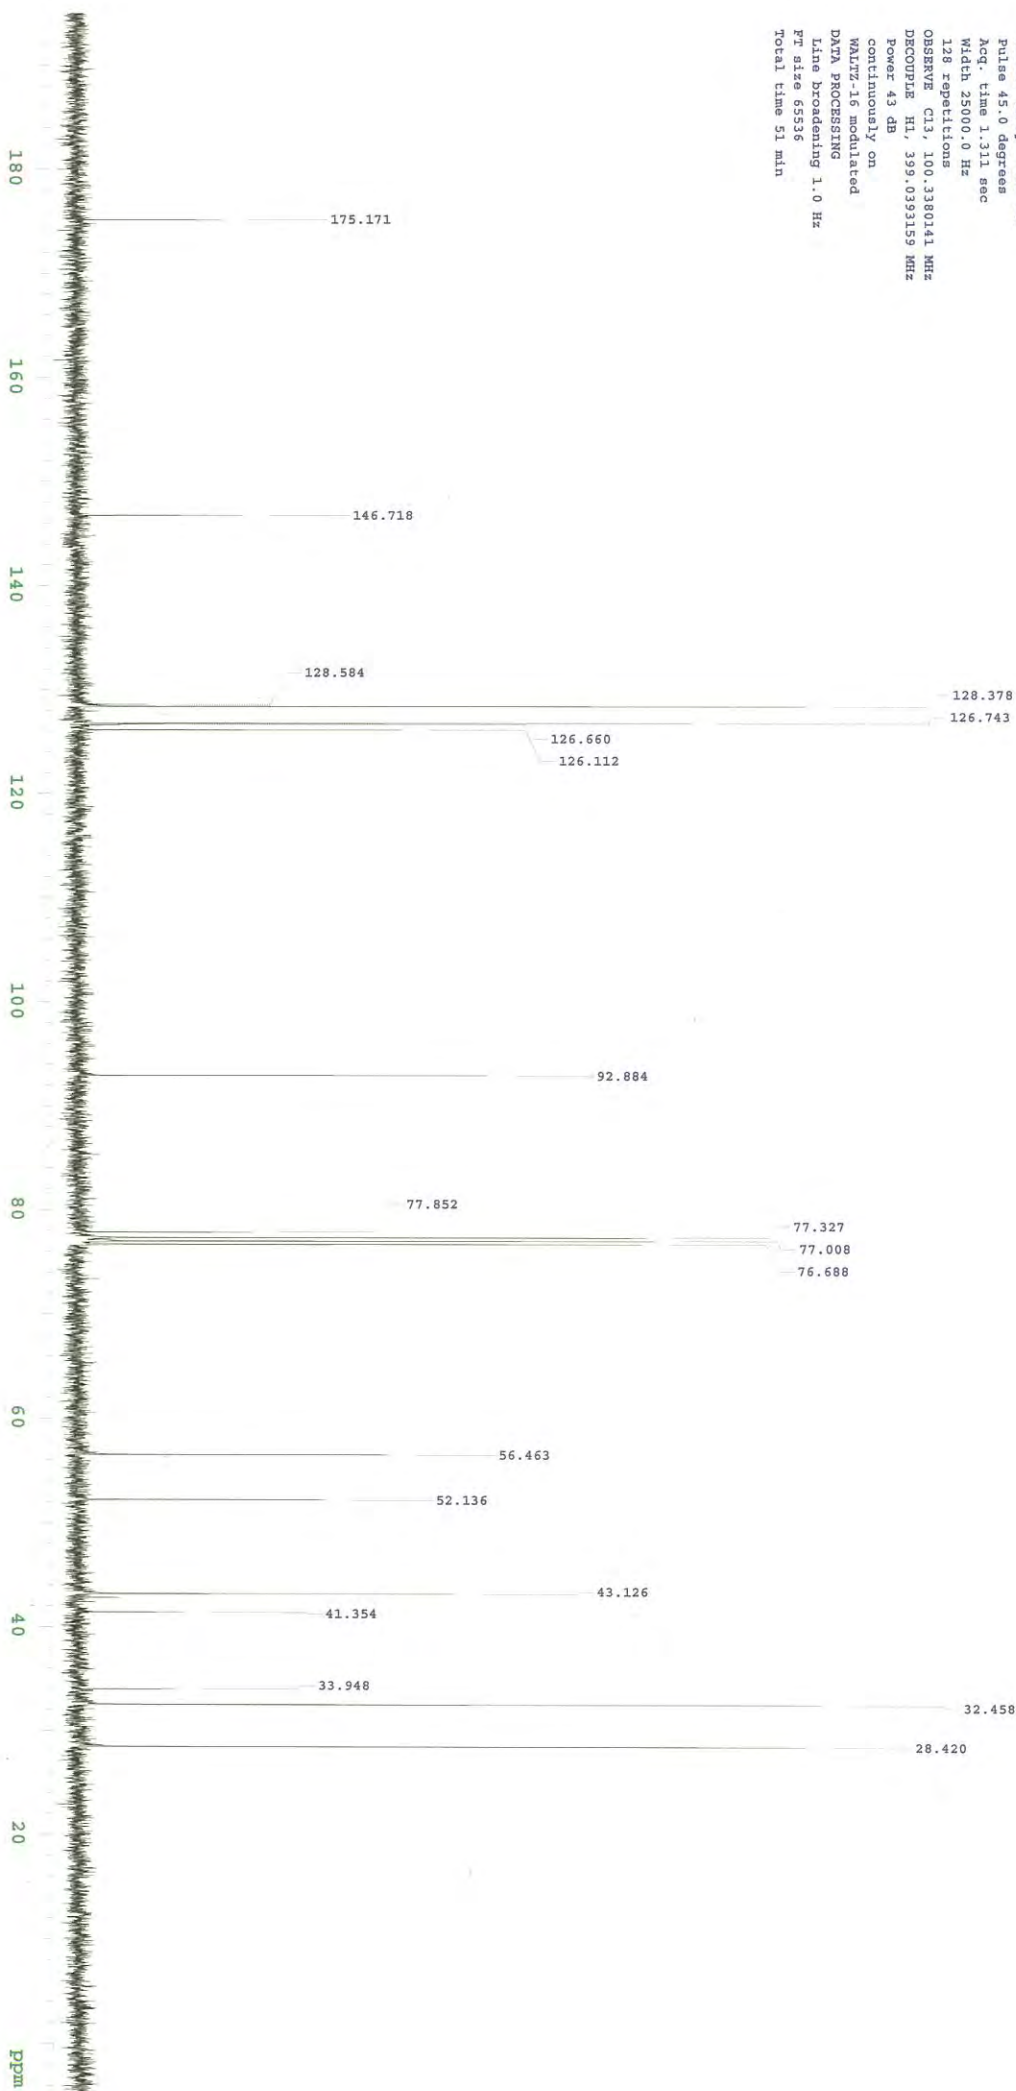



Sample Name:

Data Collected on:  
Agilent-NMR-vnmr400  
Archive directory:

Sample directory:

FIDFile: PROTON

Pulse Sequence: PROTON (zgpg3)  
Solvent: cdcl3  
Data collected on: May 30 2016

Operator: vnmr1

Relax. delay 1.500 sec  
Pulse 45.0 degrees  
Acq. time 3.500 sec  
Width 6377.6 Hz  
8 repetitions  
OBSERVE H1, 399.0373207 MHz  
DATA PROCESSING  
Line broadening 0.2 Hz  
FT size 65536  
Total time 0 min 40 sec

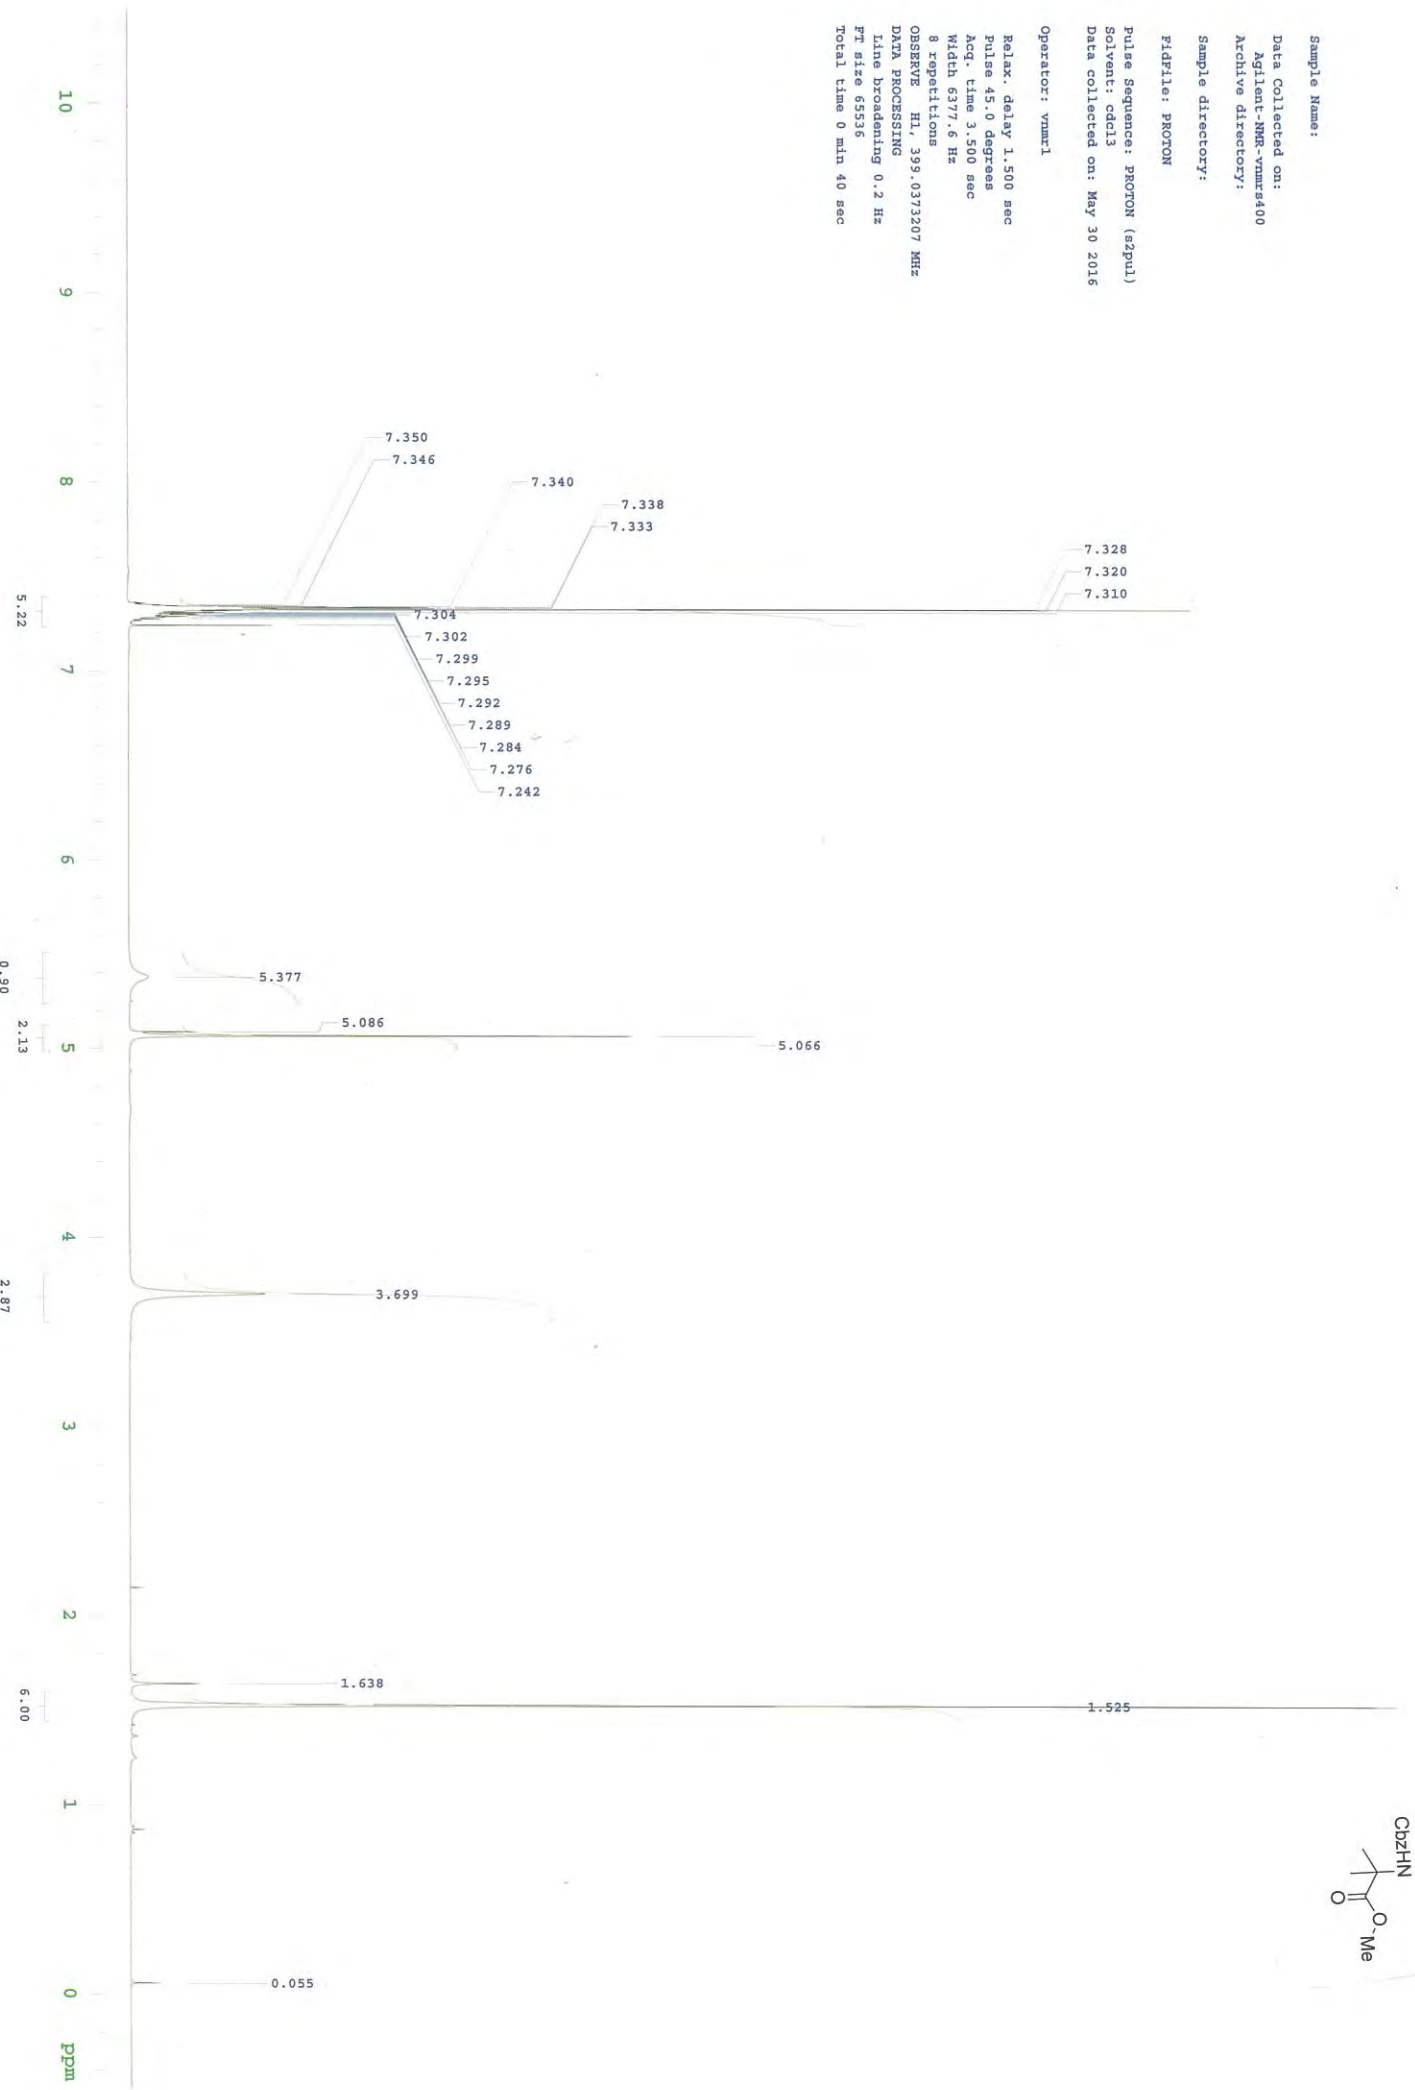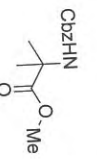

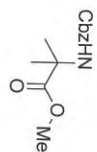

Sample Name:

Data Collected on:  
Agilent-NMR-vnmr400  
Archive directory:

Sample directory:

FIDFile: CARBON

Pulse Sequence: CARBON (a2pul)  
Solvent: cdcl3  
Data collected on: May 30 2016

Temp: 26.0 C / 299.1 K  
Operator: vnmr1

Relax. delay 1.689 sec  
Pulse 45.0 degrees  
Acq. time 1.311 sec  
Width 25000.0 Hz  
192 repetitions

OBSERVE C13, 100.380141 MHz  
DECOUPLE H1, 399.0393159 MHz  
Power 43 dB  
continuously on

WALTZ-16 modulated  
DATA PROCESSING  
Line broadening 1.0 Hz  
FT size 65536  
Total time 51 min

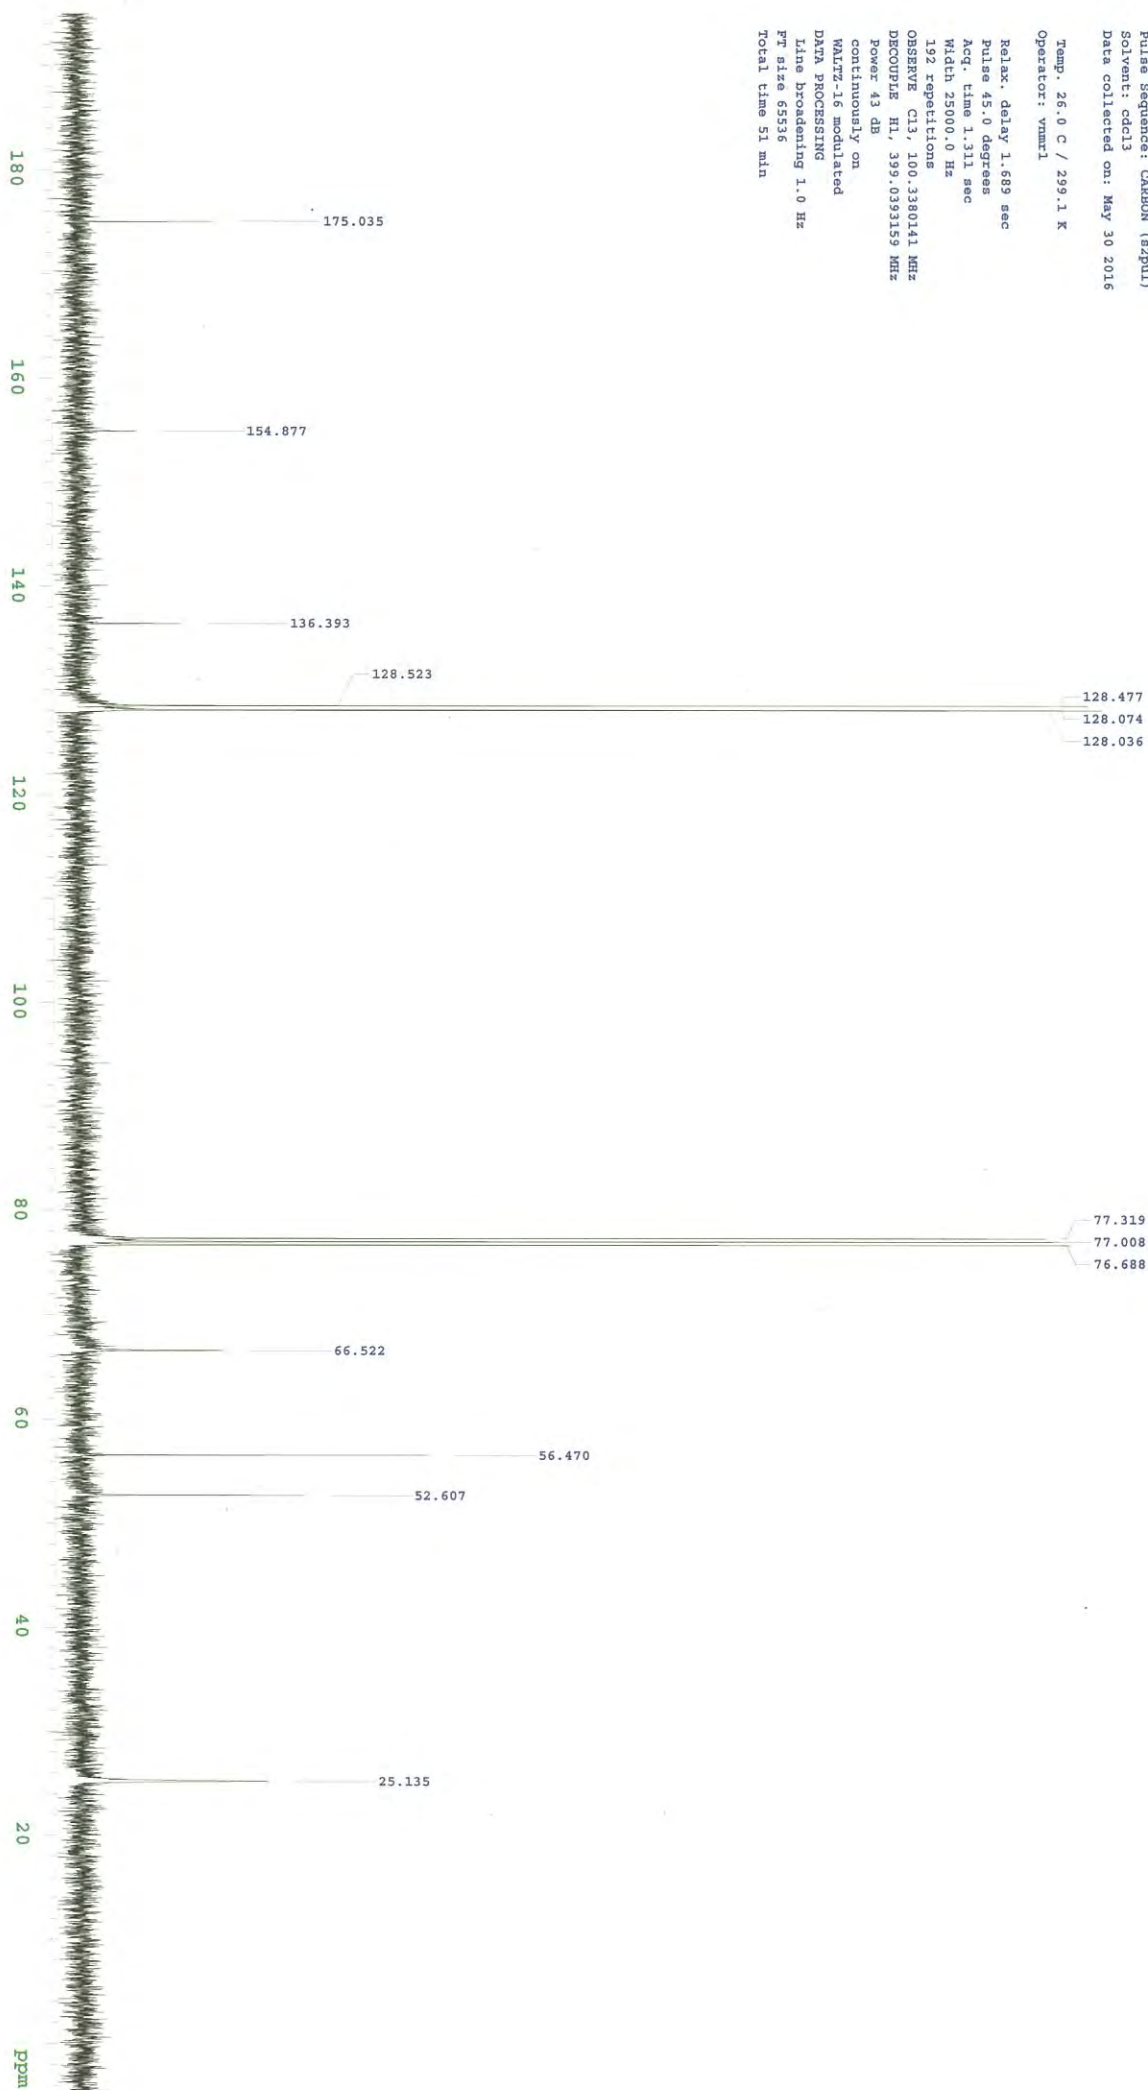

Sample Name:

Data Collected on:  
Agilent-NMR-vnmrs400  
Archive directory:

Sample directory:

FIDFile: PROTON

Pulse Sequence: PROTON (s2pul)  
Solvent: cdcl3  
Data collected on: Jul 27 2016

Operator: vnmr1

Relax. delay 1.500 sec  
Pulse 45.0 degrees  
Acq. time 3.500 sec  
Width 6377.6 Hz  
8 repetitions  
OBSERVE H1, 399.0373207 MHz  
DATA PROCESSING  
Line broadening 0.2 Hz  
FT size 65536  
Total time 0 min 40 sec

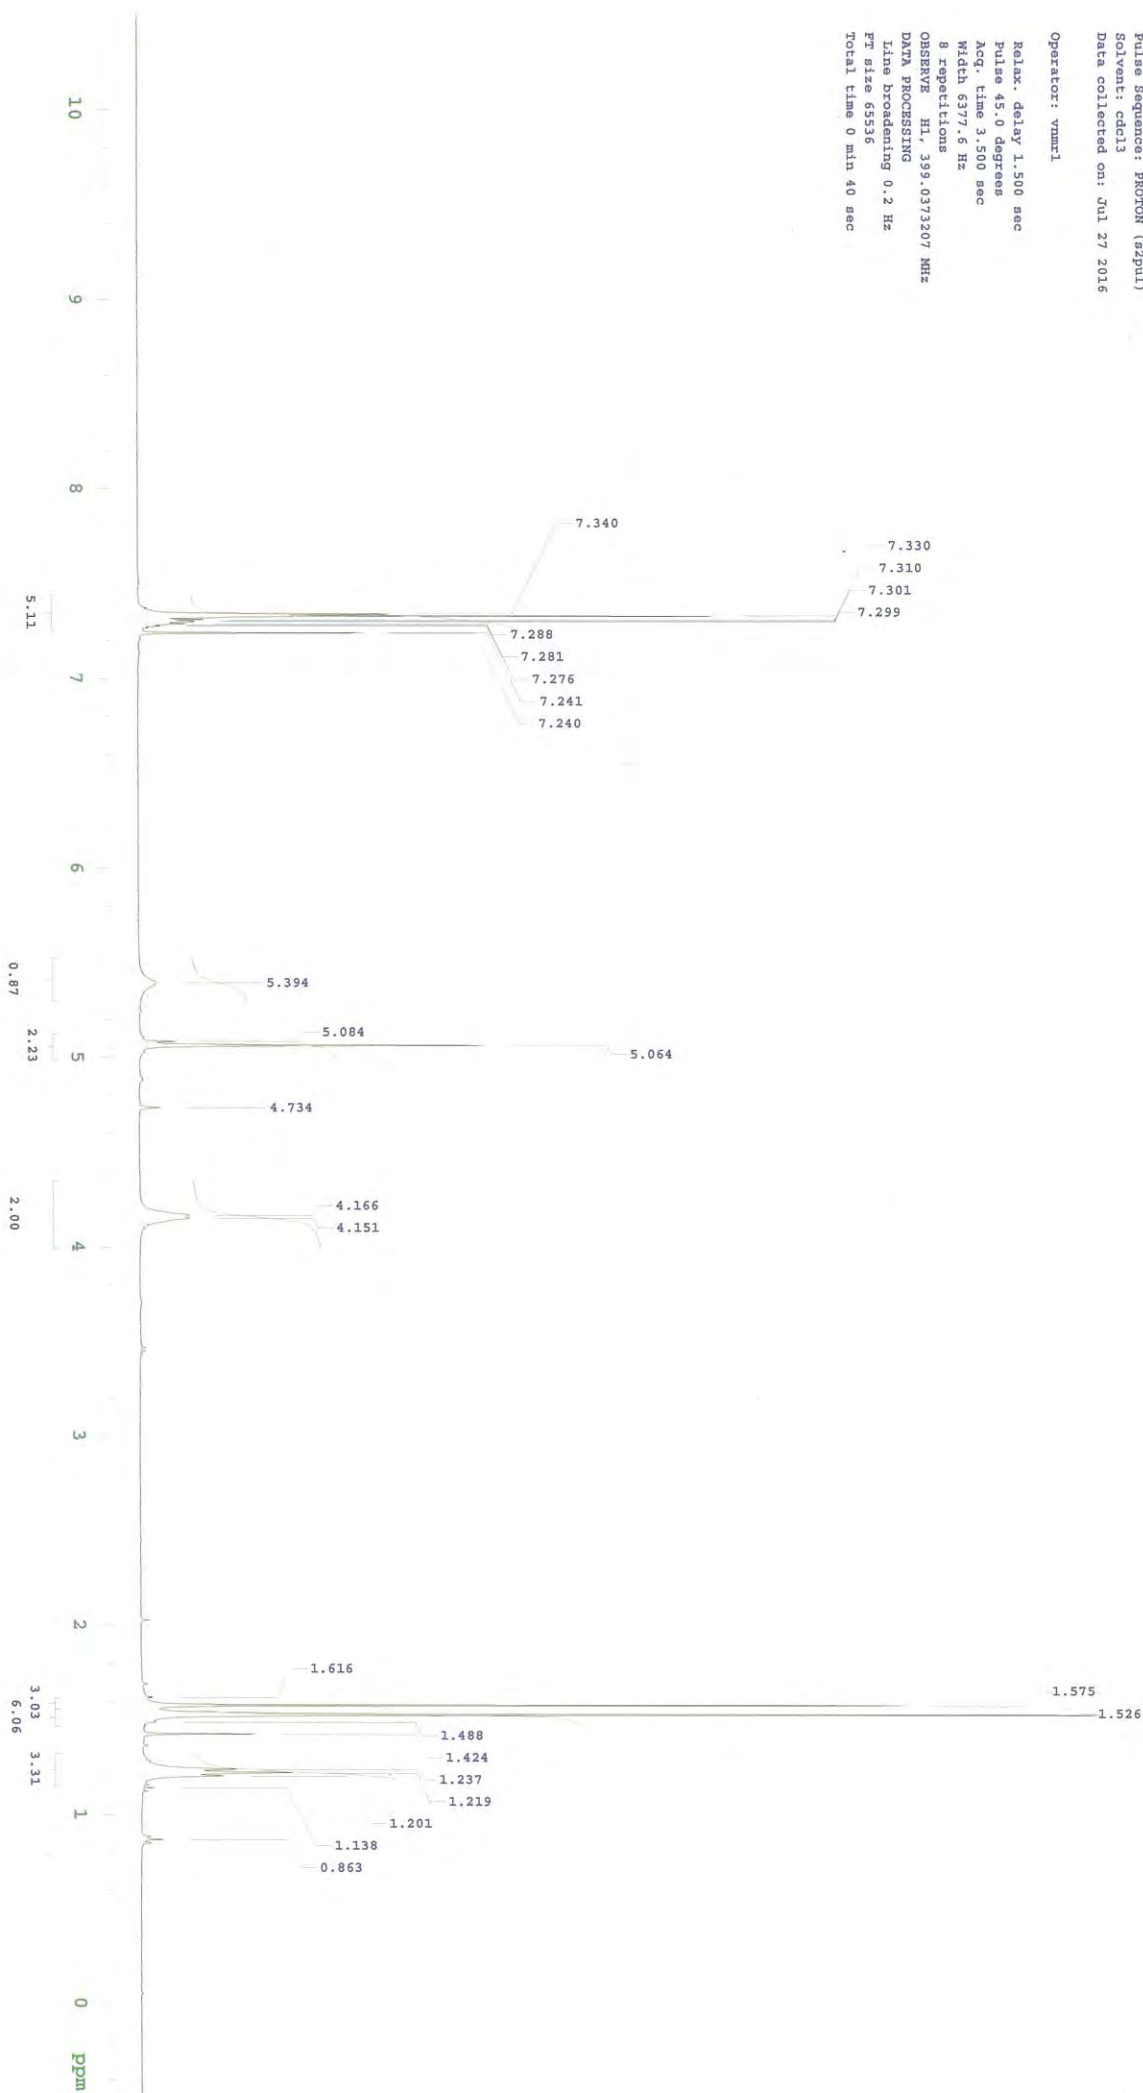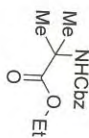

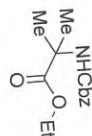

Sample Name:

Data Collected on:  
Agilent-NMR-vnmr5400  
Archive directory:

Sample directory:

FidFile: CARBON

Pulse Sequence: CARBON (zgpg3)  
Solvent: cdcl3  
Data collected on: Jul 28 2016

Temp: 24.2 C / 297.4 K  
Operator: vnmr1

Relax. delay 1.689 sec  
Pulse 45.0 degrees  
Acq. time 1.311 sec  
Width 25000.0 Hz  
1600 repetitions  
OBSERVE C13, 100.380141 MHz  
DECODE H1, 399.039159 MHz  
Power 43 dB  
continuously on  
WALTZ-16 modulated  
DATA PROCESSING  
Line broadening 1.0 Hz  
FT size 65536  
Total time 2 hr, 31 min

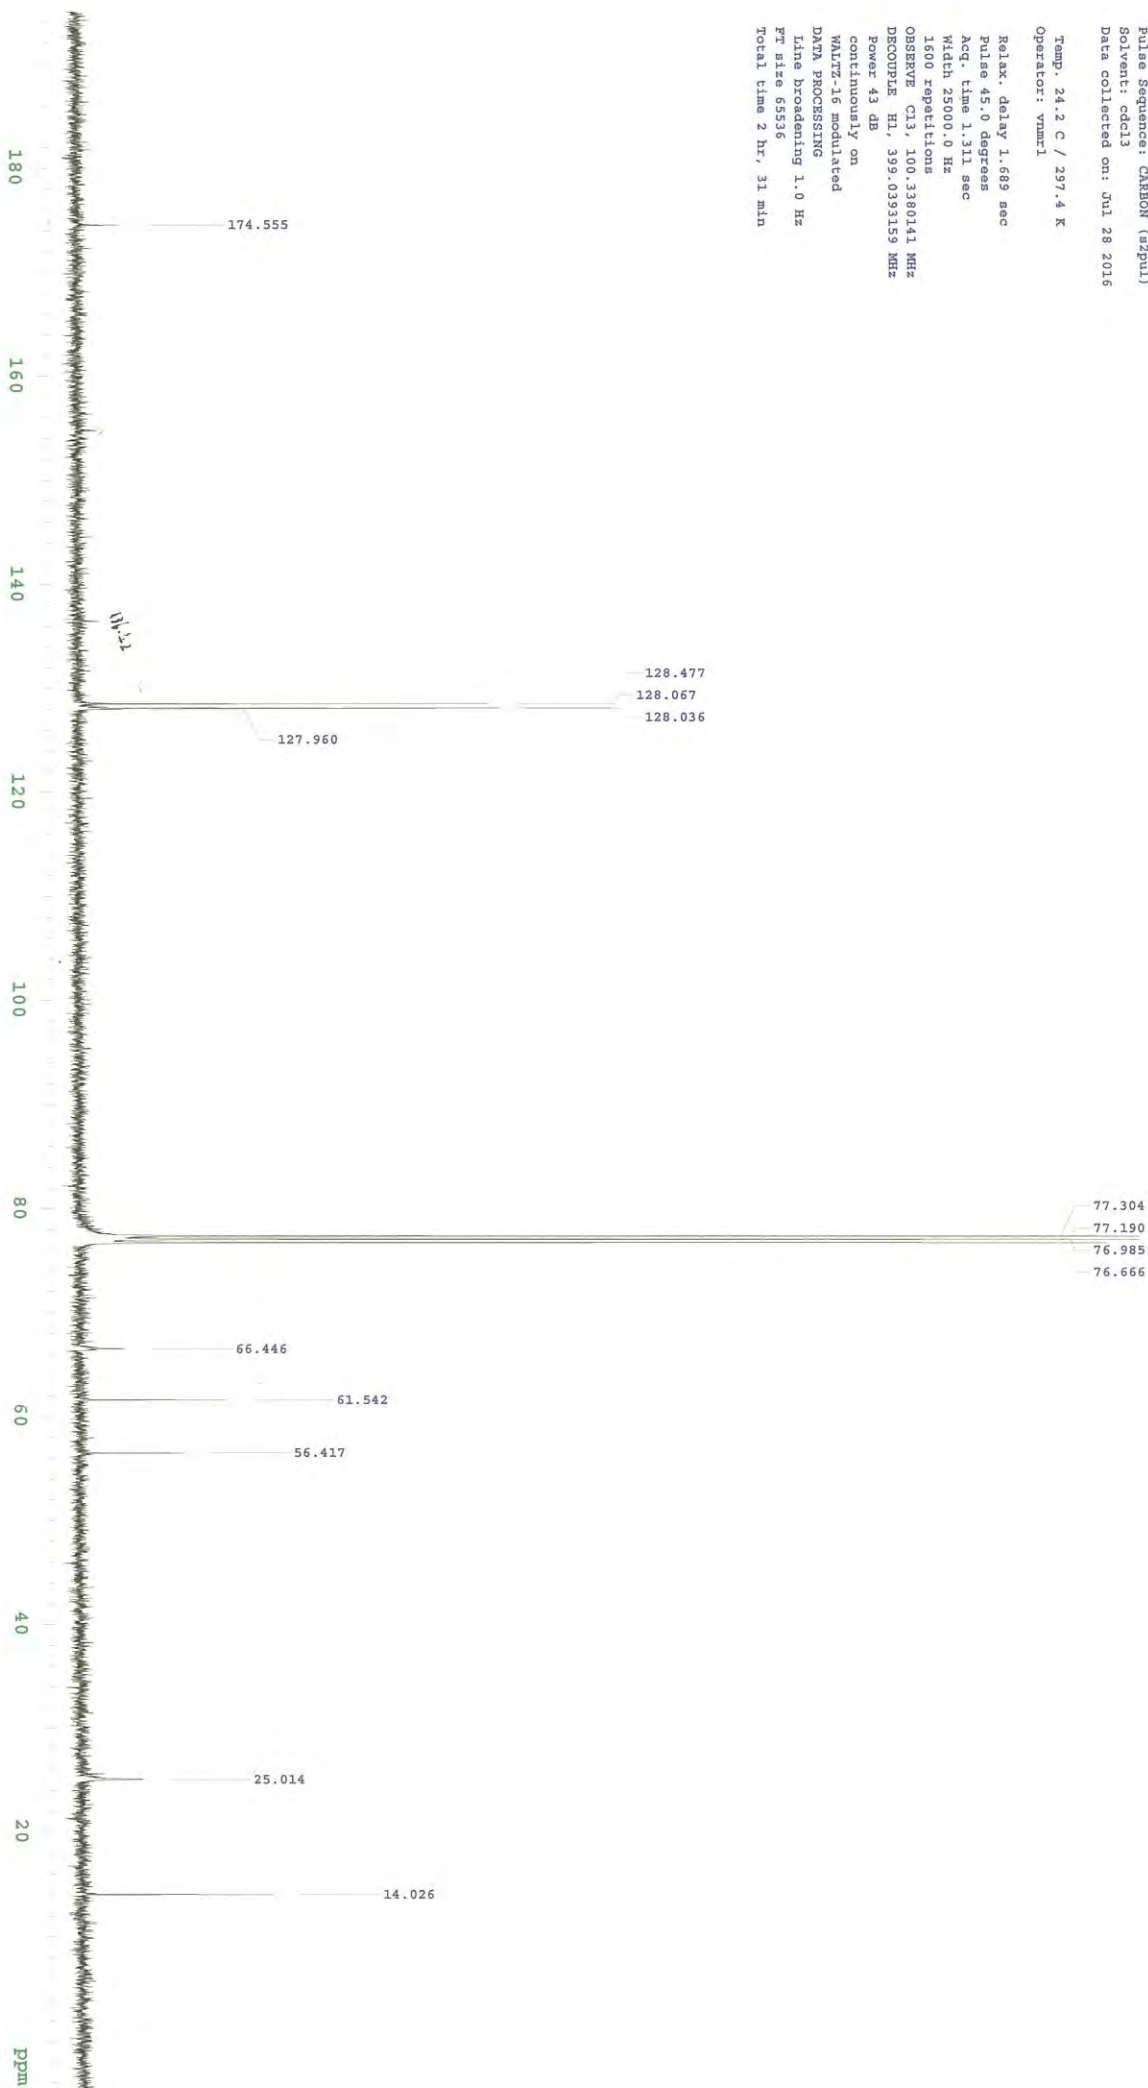

Sample Name:

Data Collected on:  
Agilent-NMR-vnmr400  
Archive directory:

Sample directory:

FidFile: PROTON

Pulse Sequence: PROTON (a2pu1)  
Solvent: cdcl3  
Data collected on: May 30 2016

Operator: vnmr1

Relax. delay 1.500 sec  
Pulse 45.0 degrees  
Acq. time 3.500 sec  
Width 6377.6 Hz

8 repetitions  
OBSERVE H1, 399.0373207 MHz  
DATA PROCESSING  
Line broadening 0.2 Hz  
FT size 65536  
Total time 0 min 40 sec

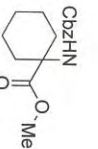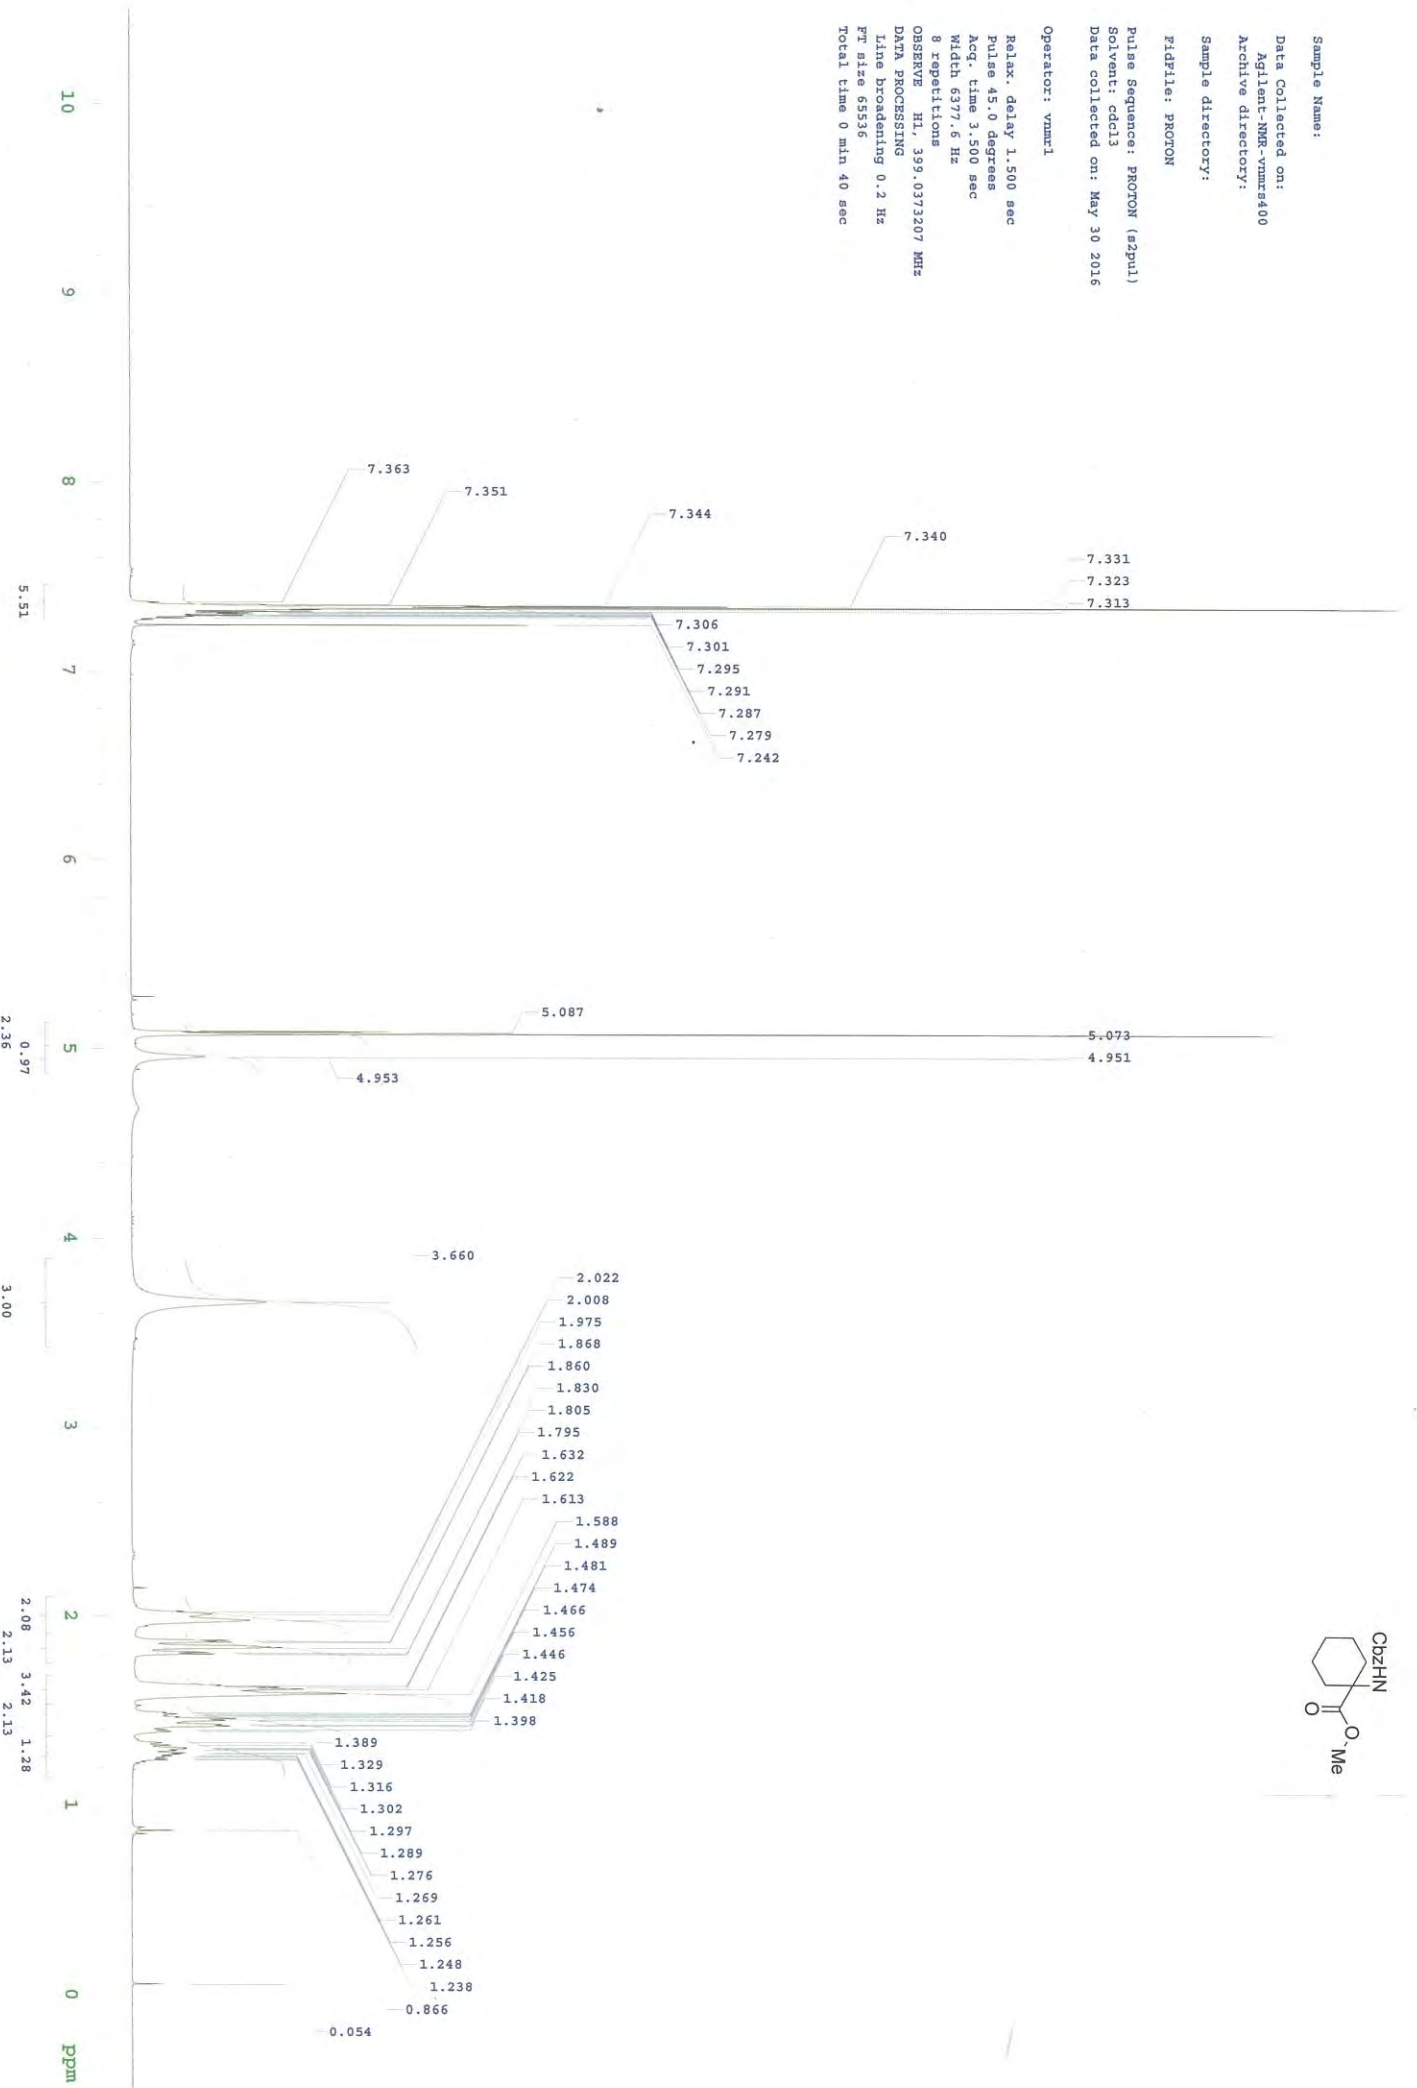

Sample Name:

Data Collected on:  
Agilent-NMR-vnmr400  
Archive directory:

Sample directory:

FidFile: CARBON

Pulse Sequence: CARBON (zgpg30)  
Solvent: cdcl3  
Data collected on: May 30 2016

Operator: vnmr1

Relax. delay 1.689 sec  
Pulse 45.0 degrees  
Acq. time 1.311 sec  
Width 25000.0 Hz  
128 repetitions  
OBSERVE C13, 100.380141 MHz  
DECOUPLE H1, 399.0393159 MHz  
Power 43 dB  
continuously on  
WALTZ-16 modulated  
DATA PROCESSING  
Line broadening 1.0 Hz  
FT size 65536  
Total time 51 min

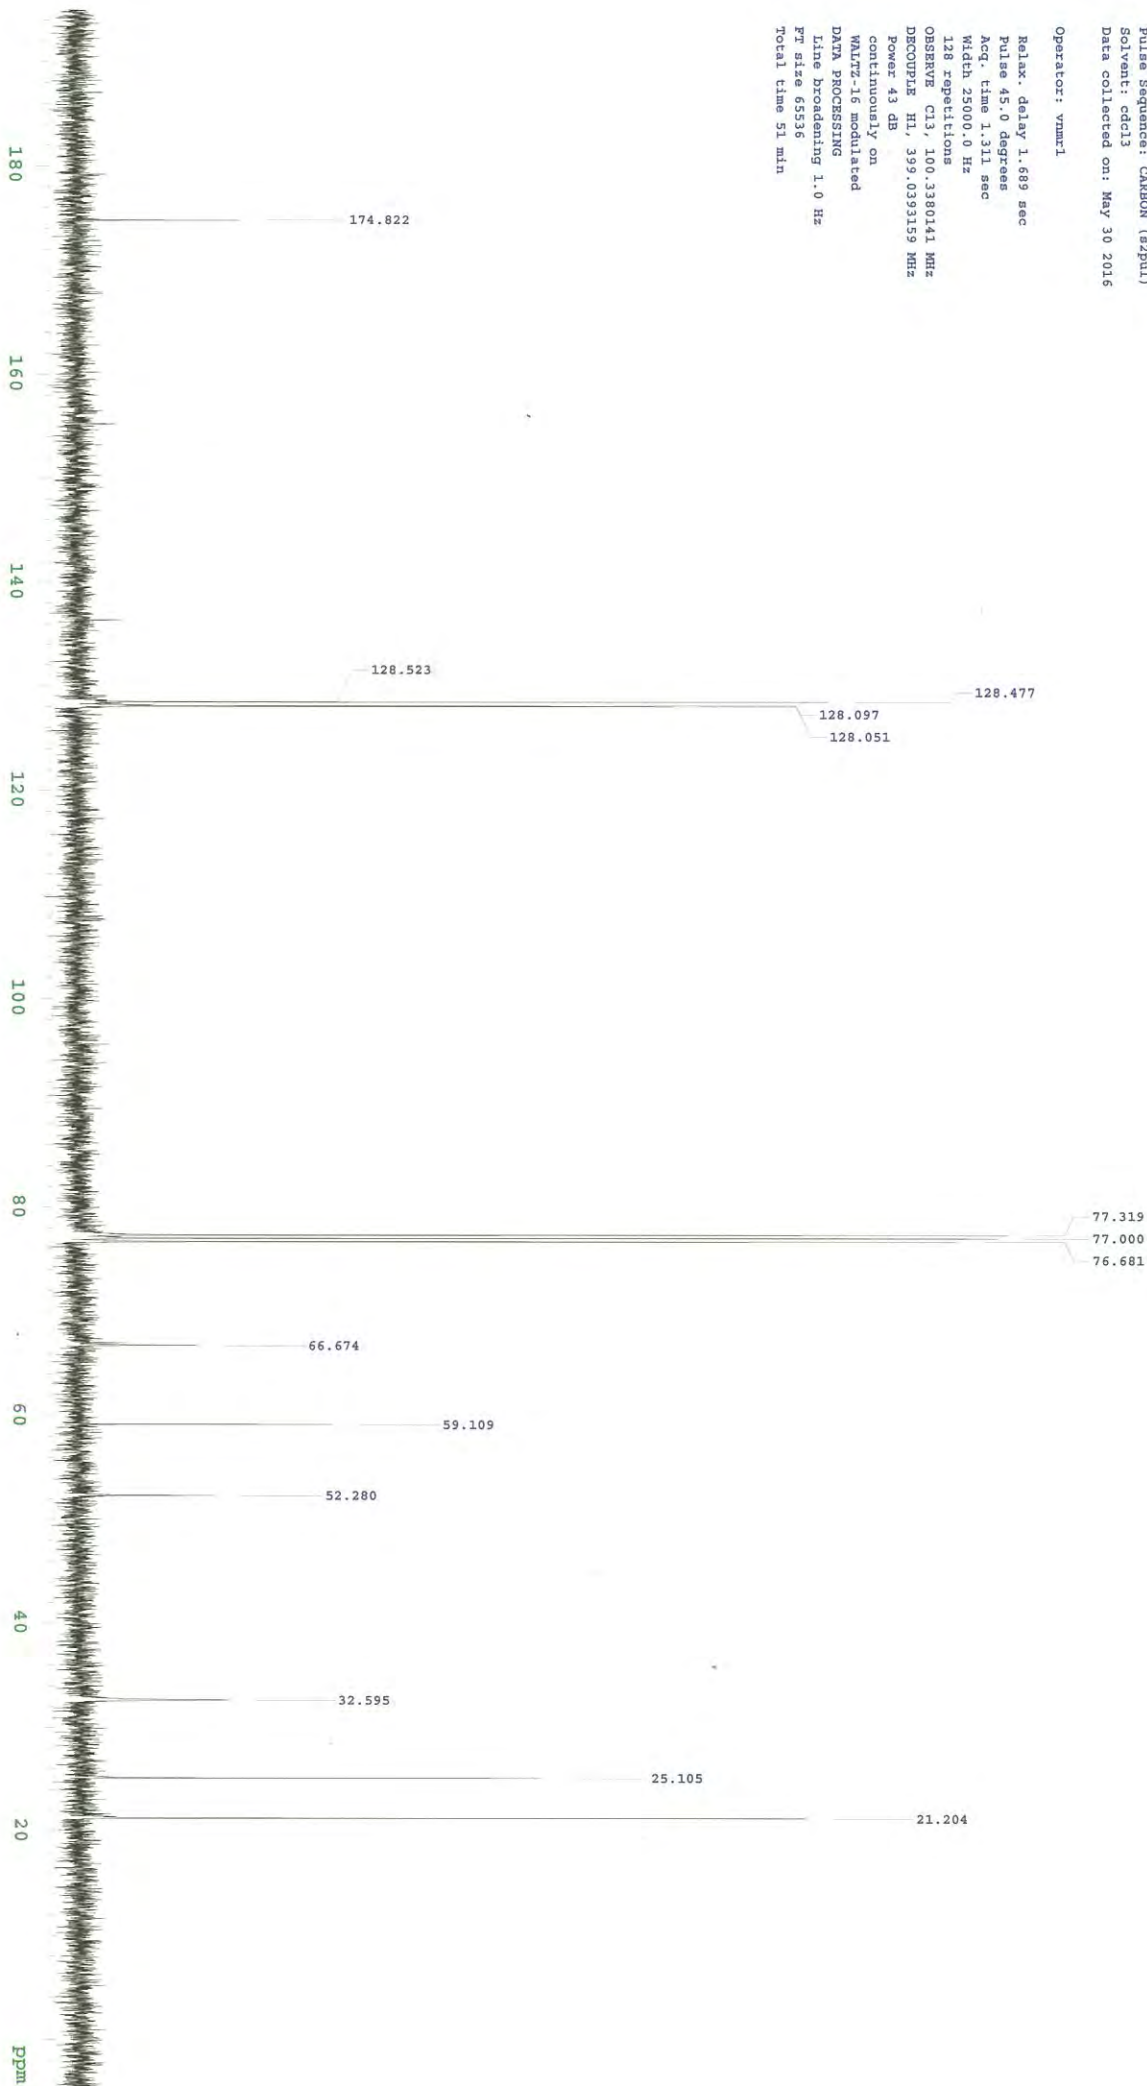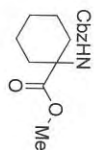

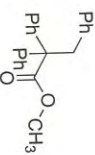

Sample Name:

Data Collected on:  
Agilent-NMR-vnmr400  
Archive directory:

Sample directory:

File: PROTON

Pulse Sequence: PROTON (zgpg30)

Solvent: cdcl3  
Data collected on: May 30 2016

Operator: vnmr1

Relax. delay 1.500 sec  
Pulse 45.0 degrees  
Acq. time 3.500 sec  
Width 6377.6 Hz  
8 repetitions  
OBSERVE H1, 399.0373207 MHz  
DATA PROCESSING  
Line broadening 0.2 Hz  
FT size 65536  
Total time 0 min 40 sec

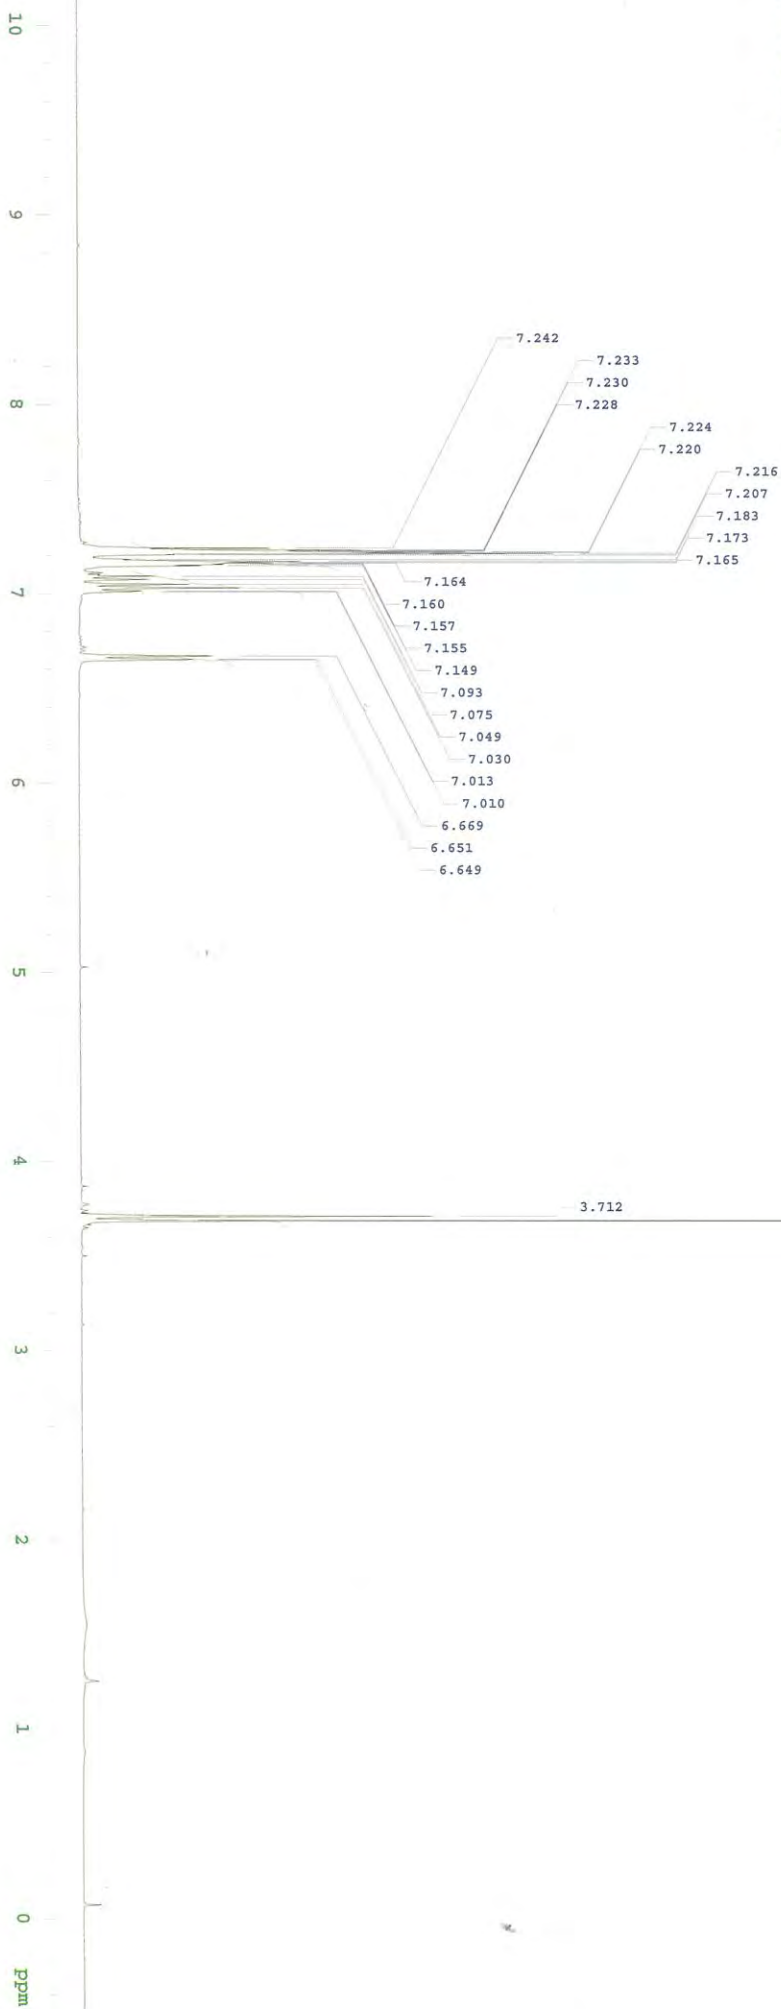



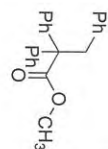

Sample Name:

Data Collected on:  
Agilent-NMR-Vnmr400  
Archive directory:

Sample directory:

FidFile: CARBON

Pulse Sequence: CARBON (zgpg30)  
Solvent: cdcl3  
Data collected on: May 30 2016

Temp. 26.6 C / 299.8 K  
Operator: vnmr1

Relax. delay 1.689 sec  
Pulse 45.0 degrees  
Acq. time 1.311 sec  
Width 25000.0 Hz  
128 repetitions

OBSERVE C13, 100.380141 MHz  
DECOUPLE H1, 399.039159 MHz  
Power 43 dB  
continuously on

WALTZ-16 modulated  
DATA PROCESSING  
Line broadening 1.0 Hz  
PT size 65536  
Total time 51 min

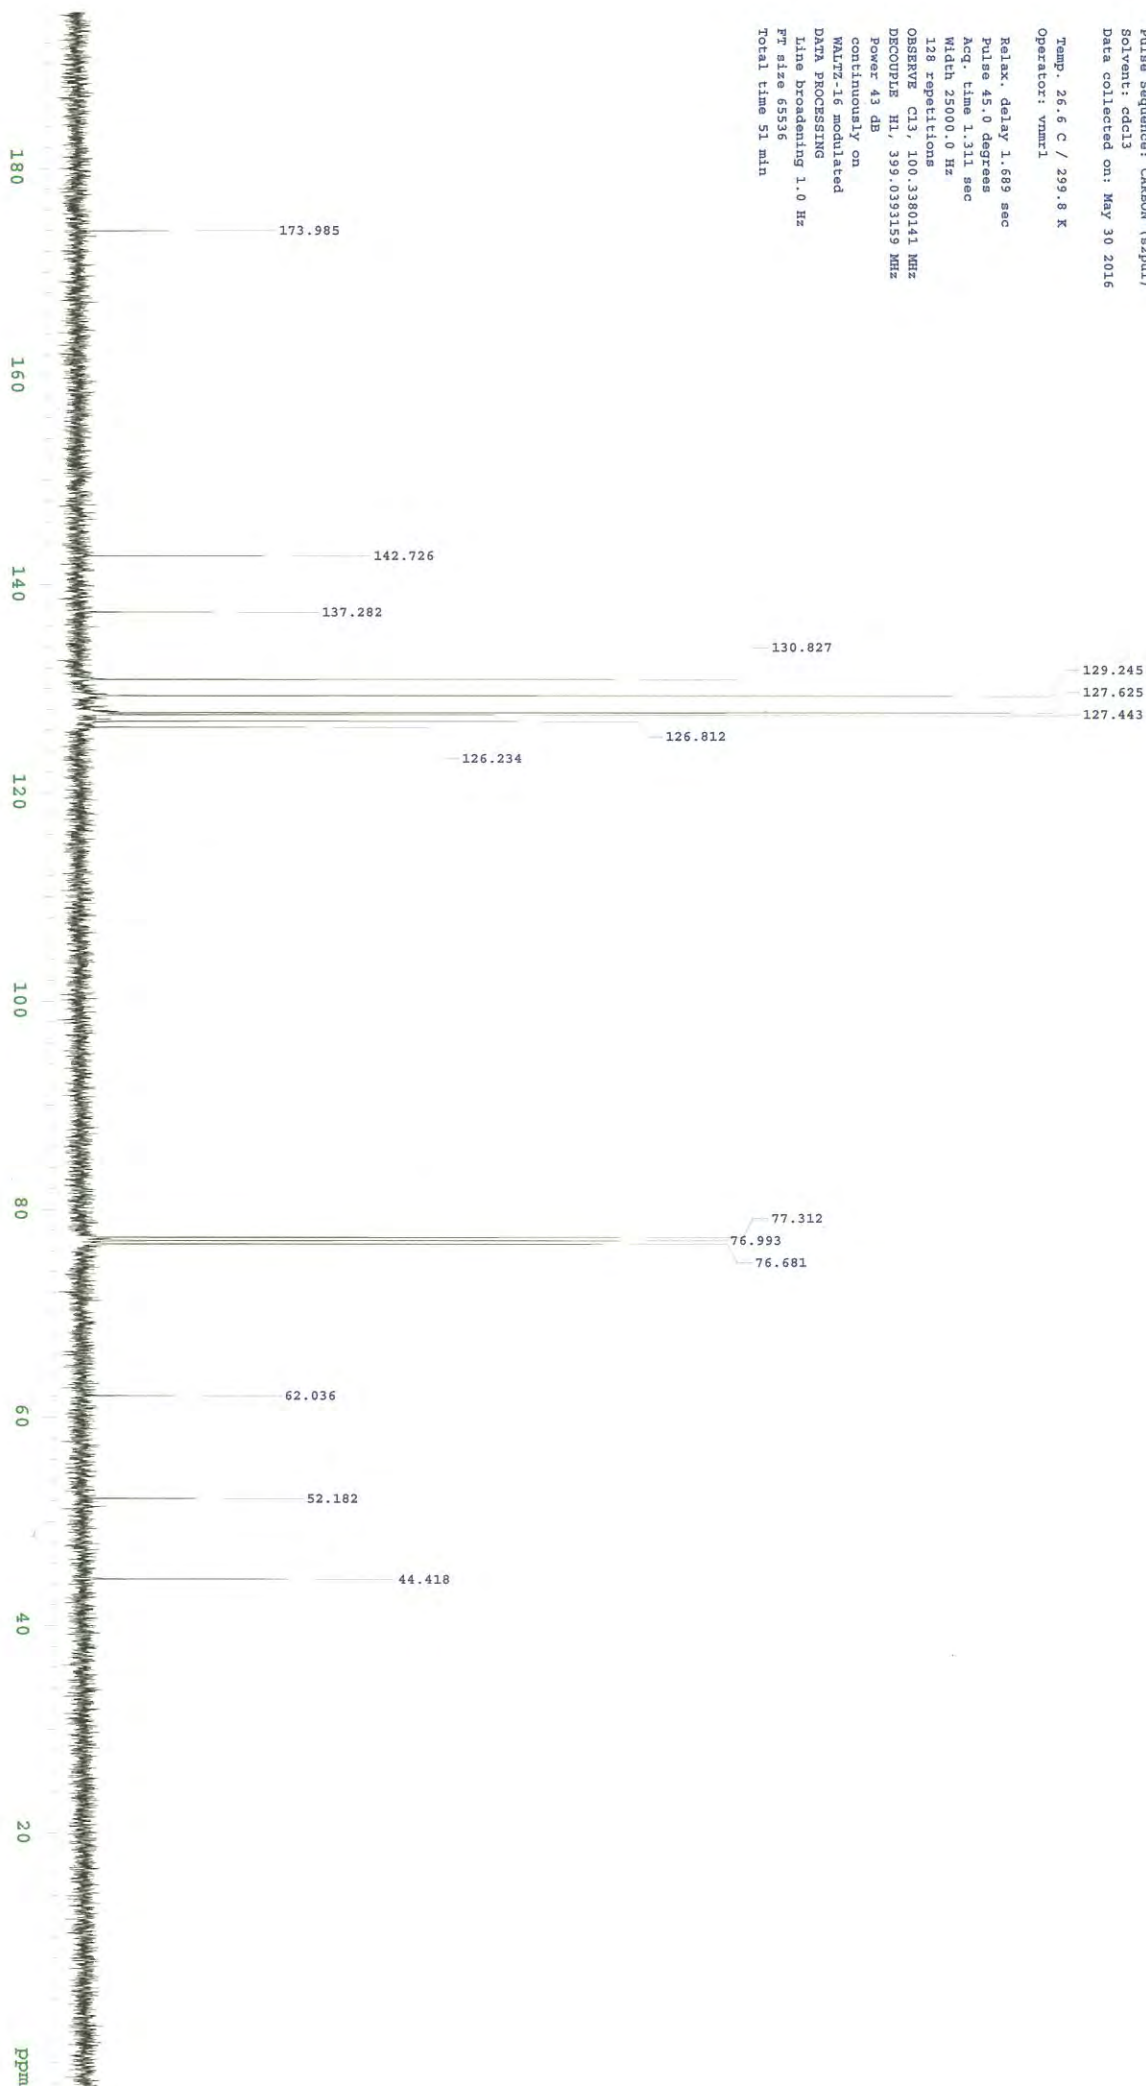

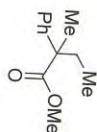

Sample Name:

Data Collected on:

Agilent-NMR-vnmr400

Archive directory:

Sample directory:

File: PROTON

Pulse Sequence: PROTON (zgpg30)

Solvent: cdcl3

Data collected on: Apr 27 2016

Operator: vnmr1

Relax. delay 1.500 sec

Pulse 45.0 degrees

Acq. time 3.500 sec

Width 6377.6 Hz

8 repetitions

OBSERVE: H1, 399.037307 MHz

DATA PROCESSING

Line broadening 0.2 Hz

FT size 65536

Total time 0 min 40 sec

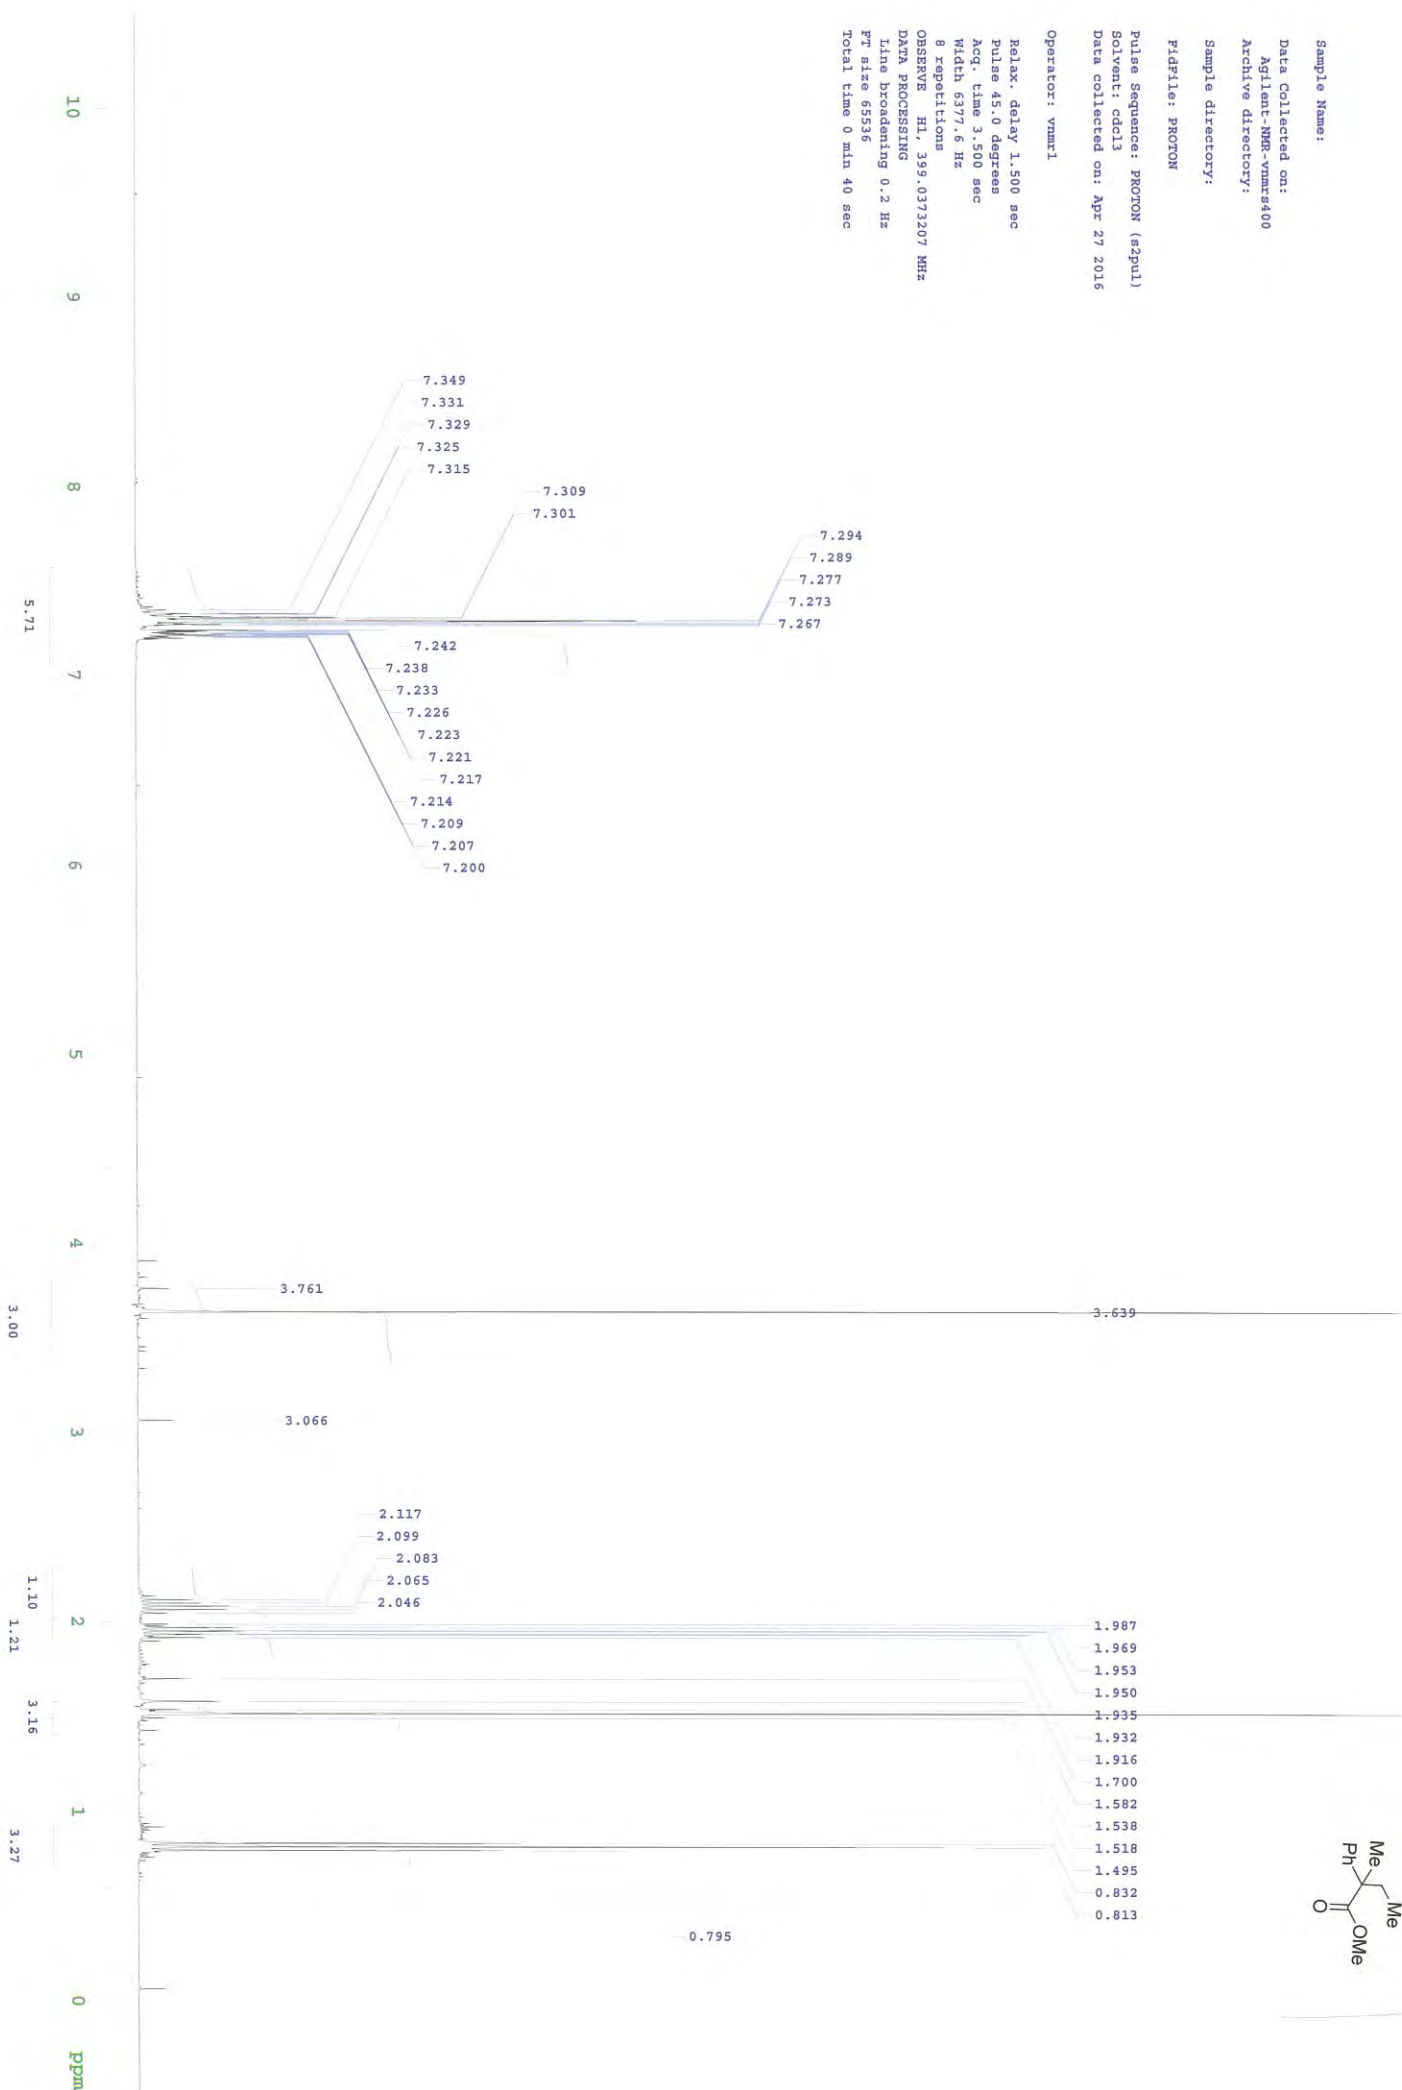

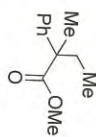

Sample Name:

Data Collected on:  
Agilent-NMR-vnmr400  
Archive directory:

Sample directory:

FidFile: CARBON

Pulse Sequence: CARBON (zgpg1)  
Solvent: cdcl3  
Data collected on: Jul 20 2016

Operator: vnmr1

Relax. delay 1.689 sec  
Pulse 45.0 degrees  
Acq. time 1.311 sec  
Width 25000.0 Hz  
64 repetitions  
OBSERVE C13, 100.380141 MHz  
DECOUPLE H1, 399.0393159 MHz  
Power 43 dB  
continuously on  
WALTZ-16 modulated  
DATA PROCESSING  
Line broadening 1.0 Hz  
FT size 65536  
Total time 51 min

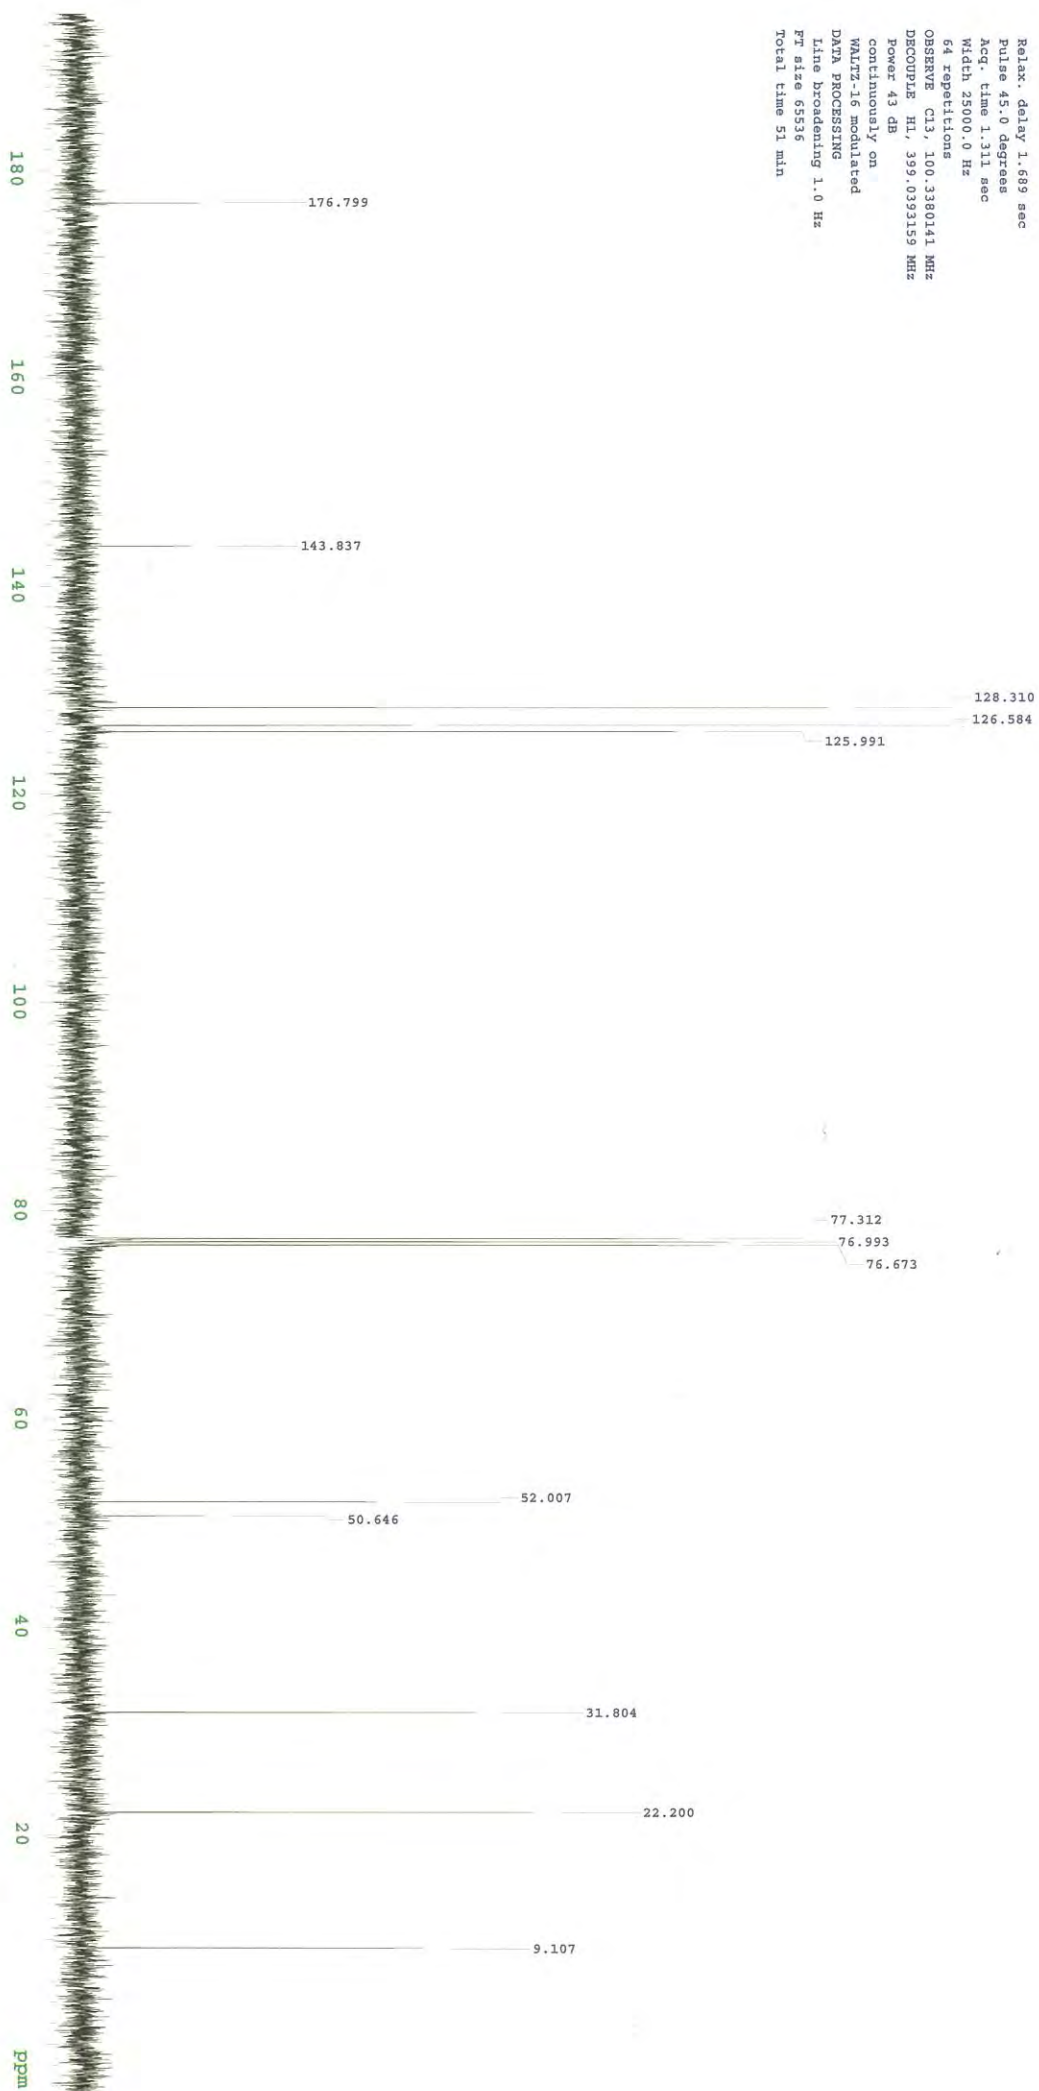

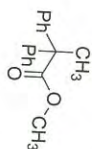

Sample Name:

Data Collected on:  
Agilent-NMR-vnmr400  
Archive directory:

Sample directory:

Fidfile: PROTON

Pulse Sequence: PROTON (zgpg3)  
Solvent: cdcl3  
Data collected on: Jul 18 2016

Operator: vnmr1

Relax. delay 1.500 sec  
Pulse 45.0 degrees  
Acq. time 3.500 sec  
Width 6377.6 Hz  
8 repetitions  
OBSERVE: H1, 399.0373207 MHz  
DATA PROCESSING  
Line broadening 0.2 Hz  
FT size 65536  
Total time 0 min 40 sec

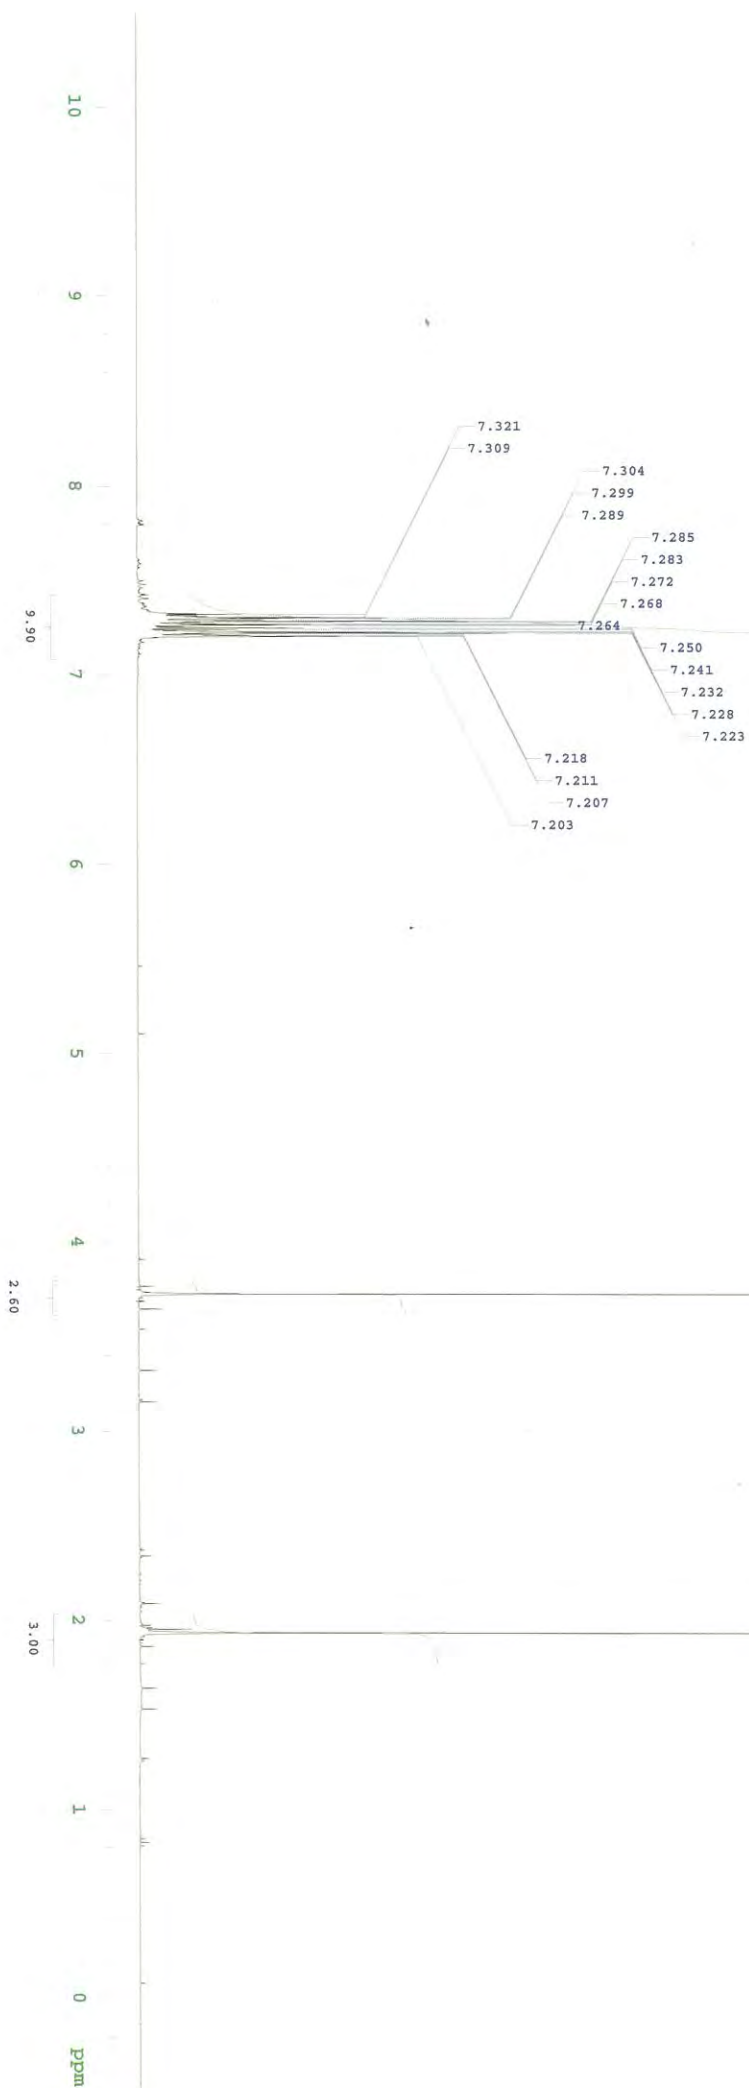

Sample Name:

Data Collected on:  
Agilent-NMR-vnmr400  
Archive directory:

Sample directory:

FidFile: CARBON

Pulse Sequence: CARBON (zgpg3)  
Solvent: cdcl3  
Data collected on: Jul 18 2016

Temp: 23.0 C / 296.1 K  
Operator: vnmr1

Relax. delay 1.689 sec  
Pulse 45.0 degrees  
Acq. time 1.311 sec  
Width 25000.0 Hz

128 repetitions  
OBSERVE C13, 100.3380141 MHz  
DECOUPLE H1, 399.0393159 MHz  
Power 43 dB  
continuously on

MALTE-16 modulated  
DATA PROCESSING  
Line broadening 1.0 Hz  
FT size 65536  
Total time 51 min

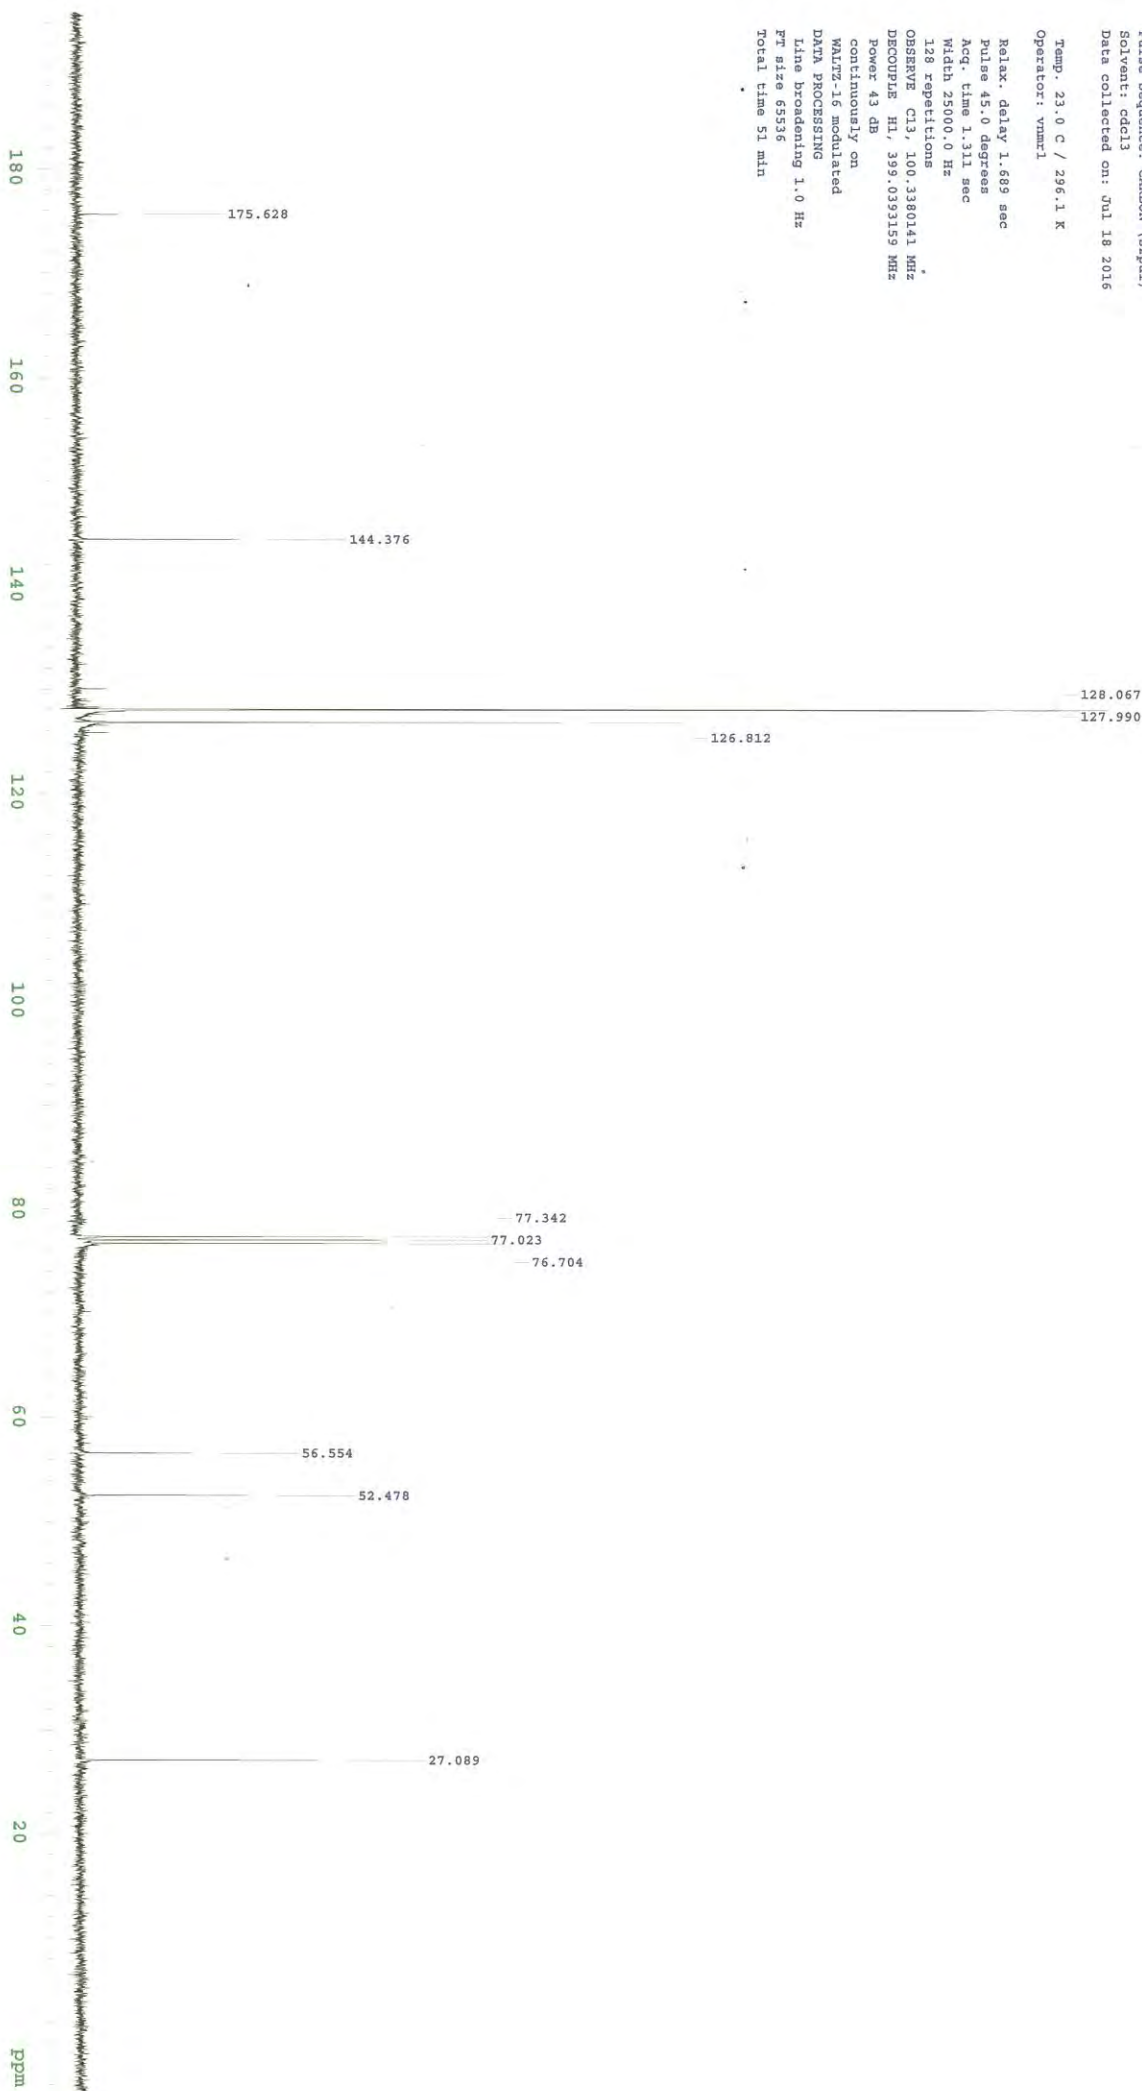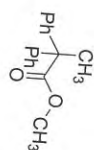

Sample Name:

Data Collected on:  
Agilent-NMR-vnmr400  
Archive directory:

Sample directory:

FidFile: 128-chiral-1H

Pulse Sequence: PROTON (zgpg3)  
Solvent: cdcl3  
Data collected on: Mar 25 2016

Operator: vnmr1

Relax. delay 1.500 sec  
Pulse 45.0 degrees  
Acq. time 3.500 sec  
Width 6377.6 Hz  
8 repetitions  
OBSERVE: H1, 399.0373207 MHz  
DATA PROCESSING  
Line broadening 0.2 Hz  
FT size 65536  
Total time 0 min 40 sec

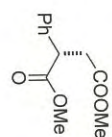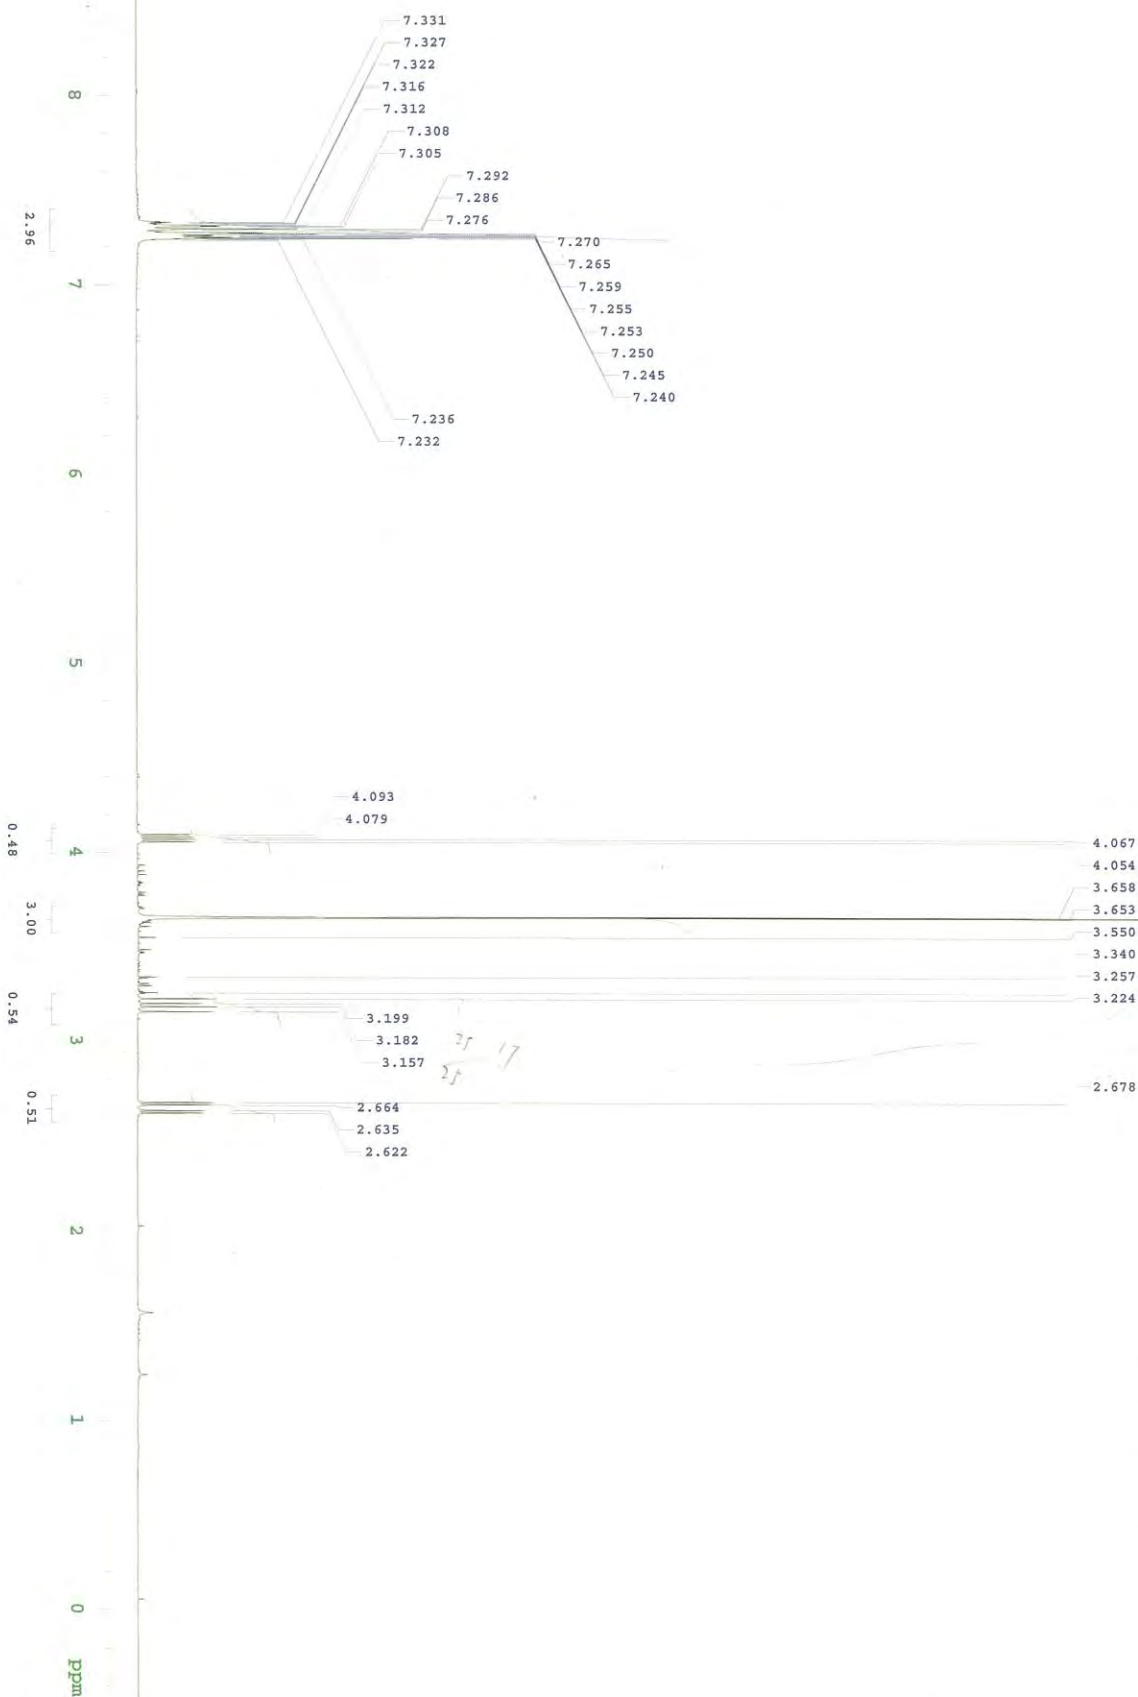

Sample Name:

Data Collected on:  
Agilent-NMR-vnmr400  
Archive directory:

Sample directory:

F1dFile: PROTON

Pulse Sequence: PROTON (zgpg3)  
Solvent: cdcl3  
Data collected on: Jul 26 2016

Operator: vnmr1

Relax. delay 1.500 sec  
Pulse 45.0 degrees  
Acq. time 3.500 sec  
Width 6377.6 Hz

8 repetitions

OBSERVE H1, 399.0373207 MHz

DATA PROCESSING

Line broadening 0.2 Hz

FT size 65536

Total time 0 min 40 sec

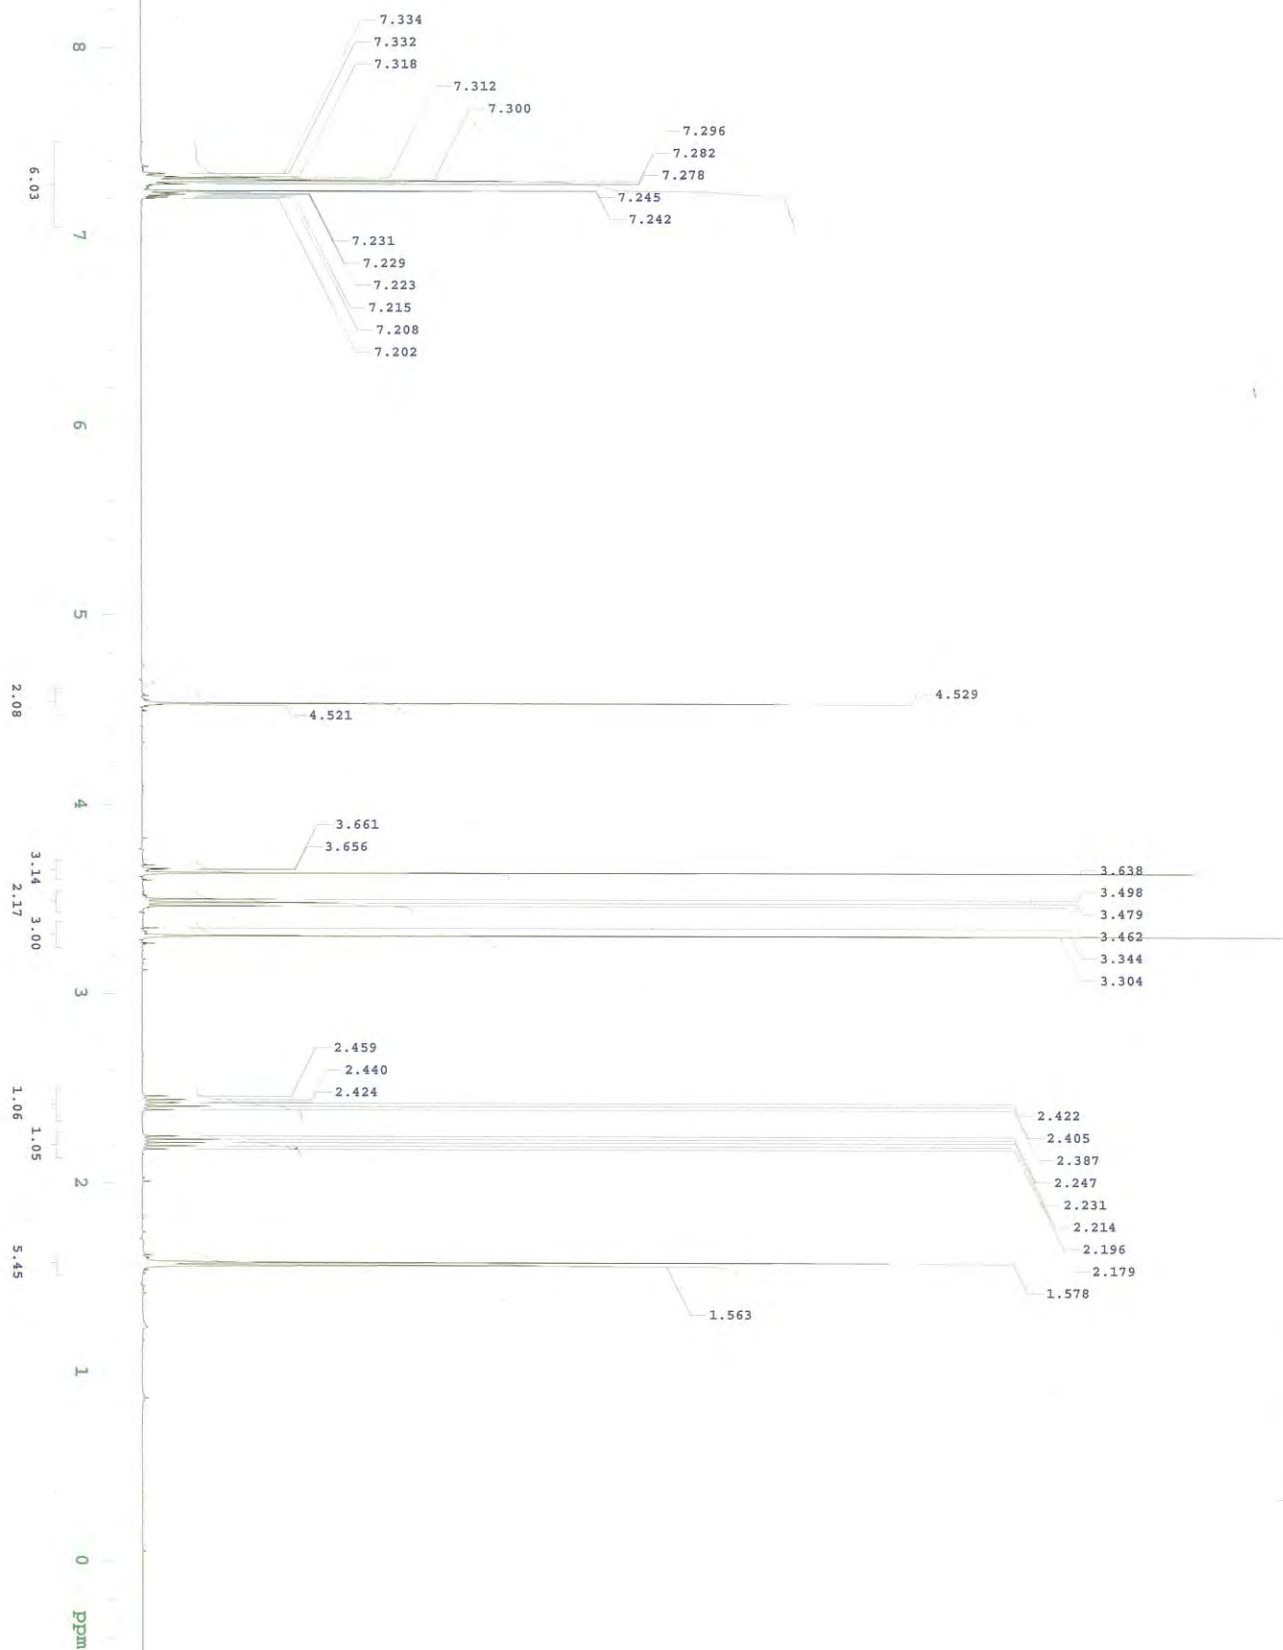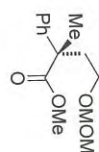



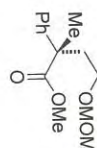

Sample Name:

Data Collected on:  
 Agilent-NMR-vnmr5400  
 Archive directory:

Sample directory:

FidFile: CARBON

Pulse Sequence: CARBON (a2pul)  
 Solvent: cdcl3  
 Data collected on: Jul 26 2016

Temp. 23.8 C / 296.9 K  
 Operator: vnmr1

Relax. delay 1.689 sec  
 Pulse 45.0 degrees  
 Acq. time 1.311 sec  
 Width 25000.0 Hz  
 192 repetitions  
 OBSERVE c13, 100.380141 MHz  
 DECOUPLE h1, 399.033159 MHz  
 Power 43 dB  
 continuously on  
 WALTZ-16 modulated  
 DATA PROCESSING  
 Line broadening 1.0 Hz  
 FT size 65536  
 Total time 51 min

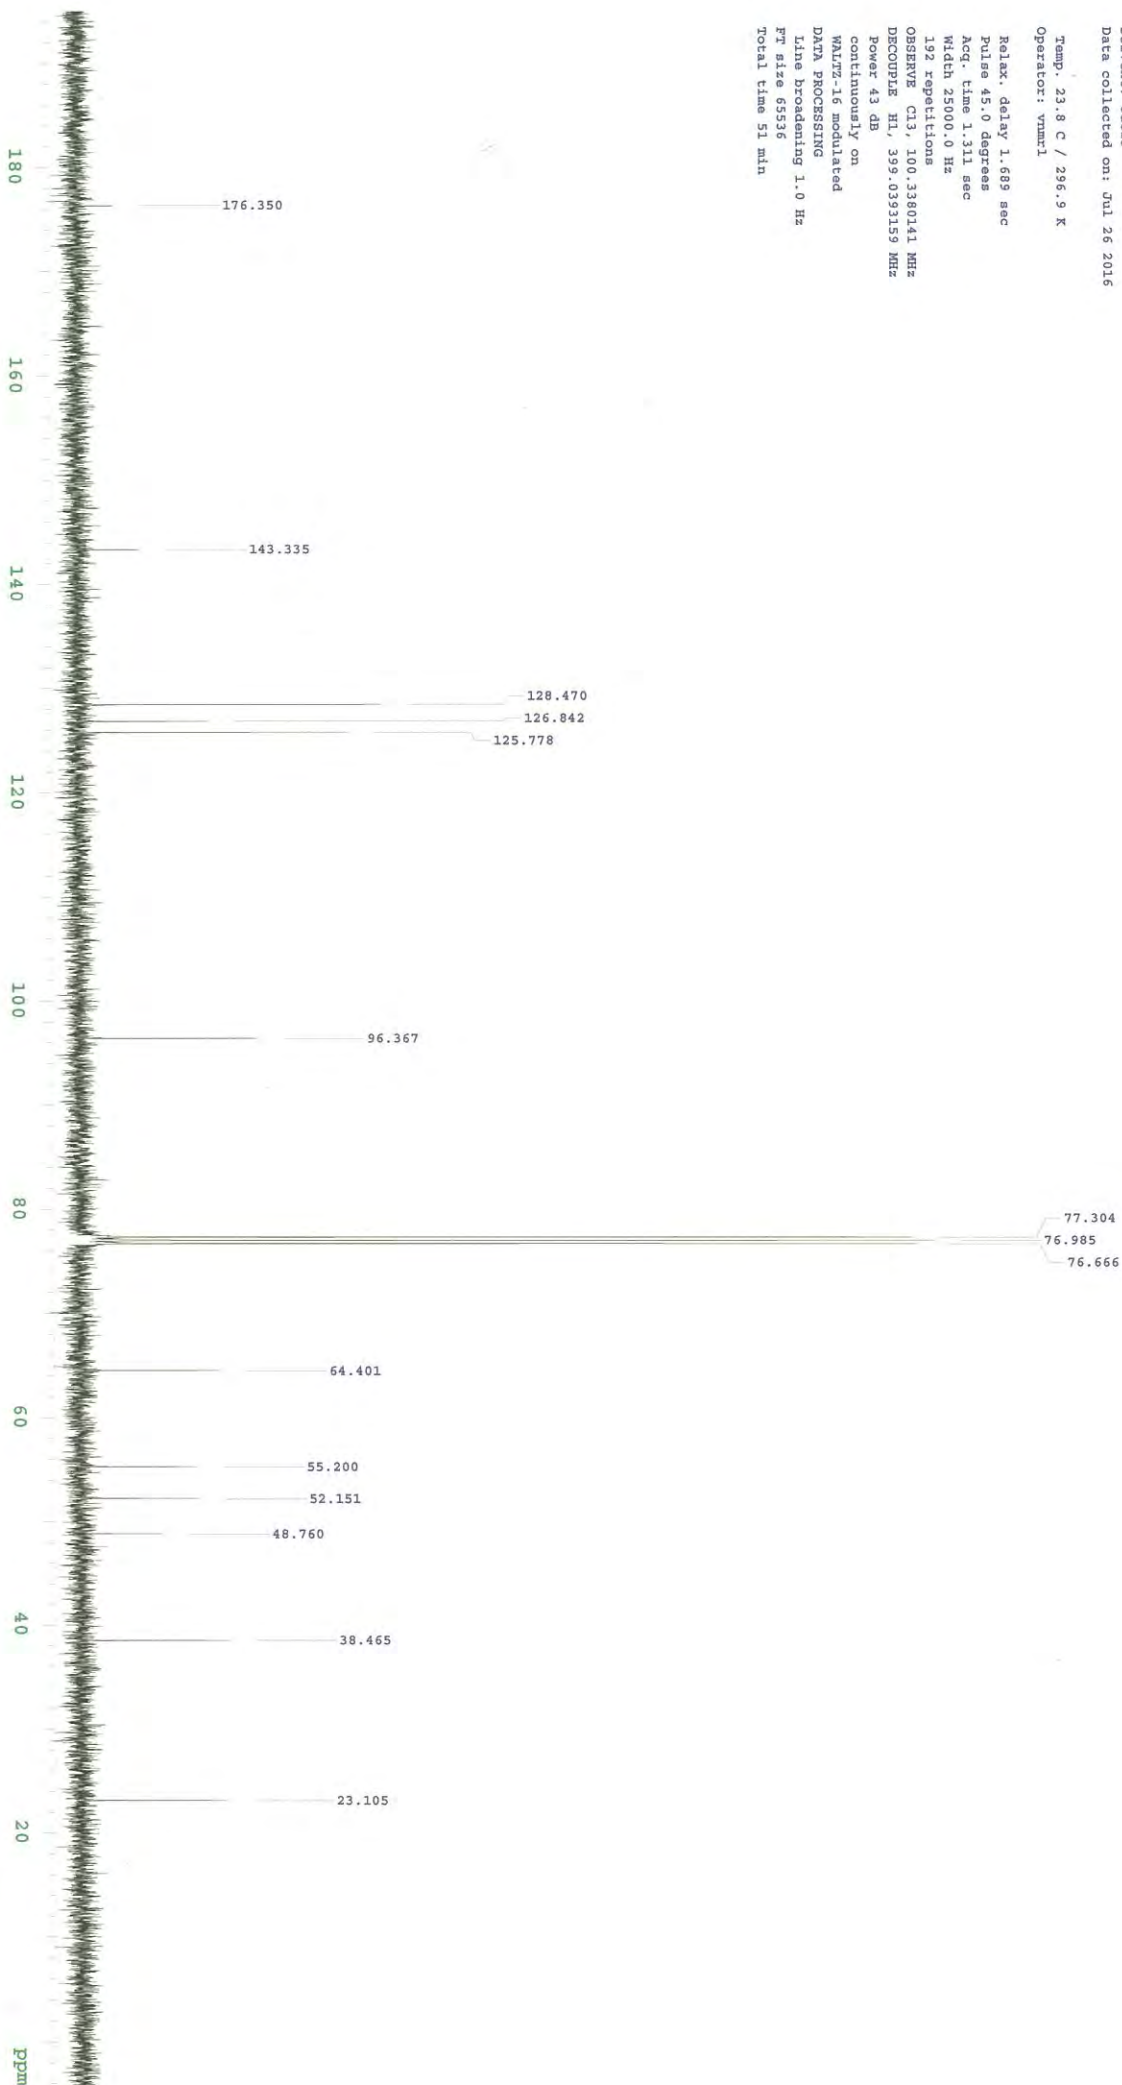

Sample Name:

Data Collected on:  
Agilent-NMR-vnmr400  
Archive directory:

Sample directory:

FID file: PROTON

Pulse Sequence: PROTON (zgpg30)  
Solvent: cdcl3  
Data collected on: Jul 25 2016

Operator: vnmr1

Relax. delay 1.500 sec  
Pulse 45.0 degrees  
Acq. time 3.500 sec  
Width 6377.6 Hz  
8 repetitions  
OBSERVE H1, 399.0373207 MHz  
DATA PROCESSING  
Line broadening 0.2 Hz  
FT size 65536  
Total time 0 min 40 sec

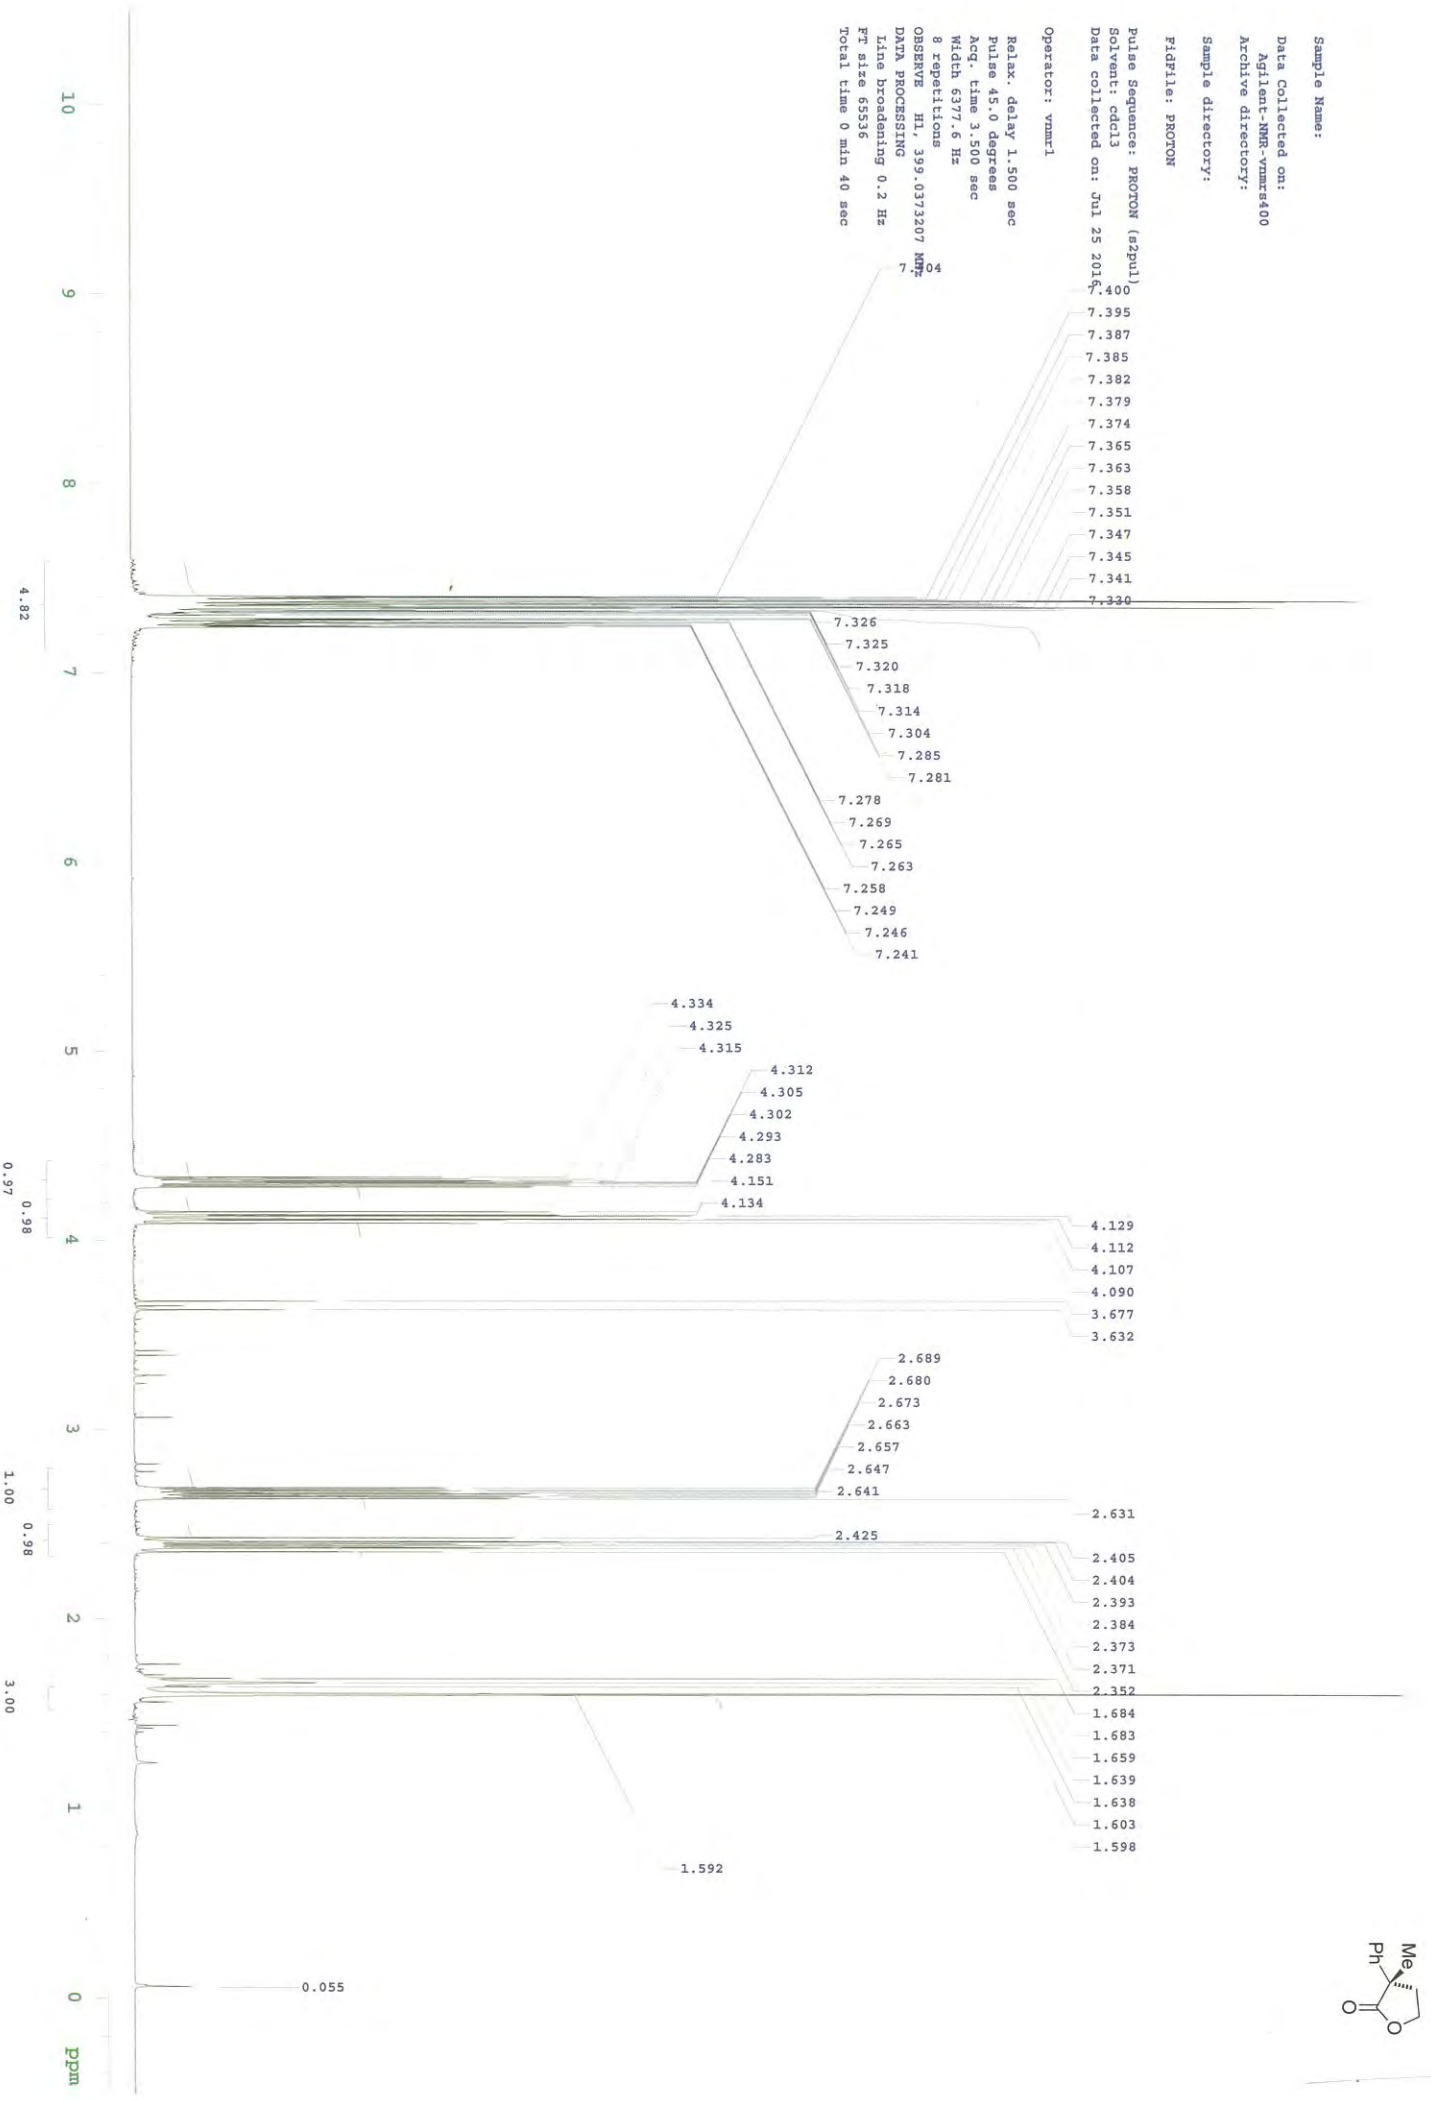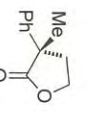

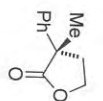

Sample Name:

Data Collected on:  
Agilent-NMR-vnmrs400  
Archive directory:

Sample directory:

FIDFile: CARBON

Pulse Sequence: CARBON (zgpg1)  
Solvent: cdcl3  
Data collected on: Jul 25 2016

Operator: vnmr1

Relax. delay 1.689 sec  
Pulse 45.0 degrees  
Acq. time 1.311 sec  
Width 25000.0 Hz  
64 repetitions  
OBSERVE C13, 100.380141 MHz  
DECOUPLE H1, 399.0393159 MHz  
Power 43 dB  
continuously on  
WALTZ-16 modulated  
DATA PROCESSING  
Line broadening 1.0 Hz  
FT size 65536  
Total time 51 min

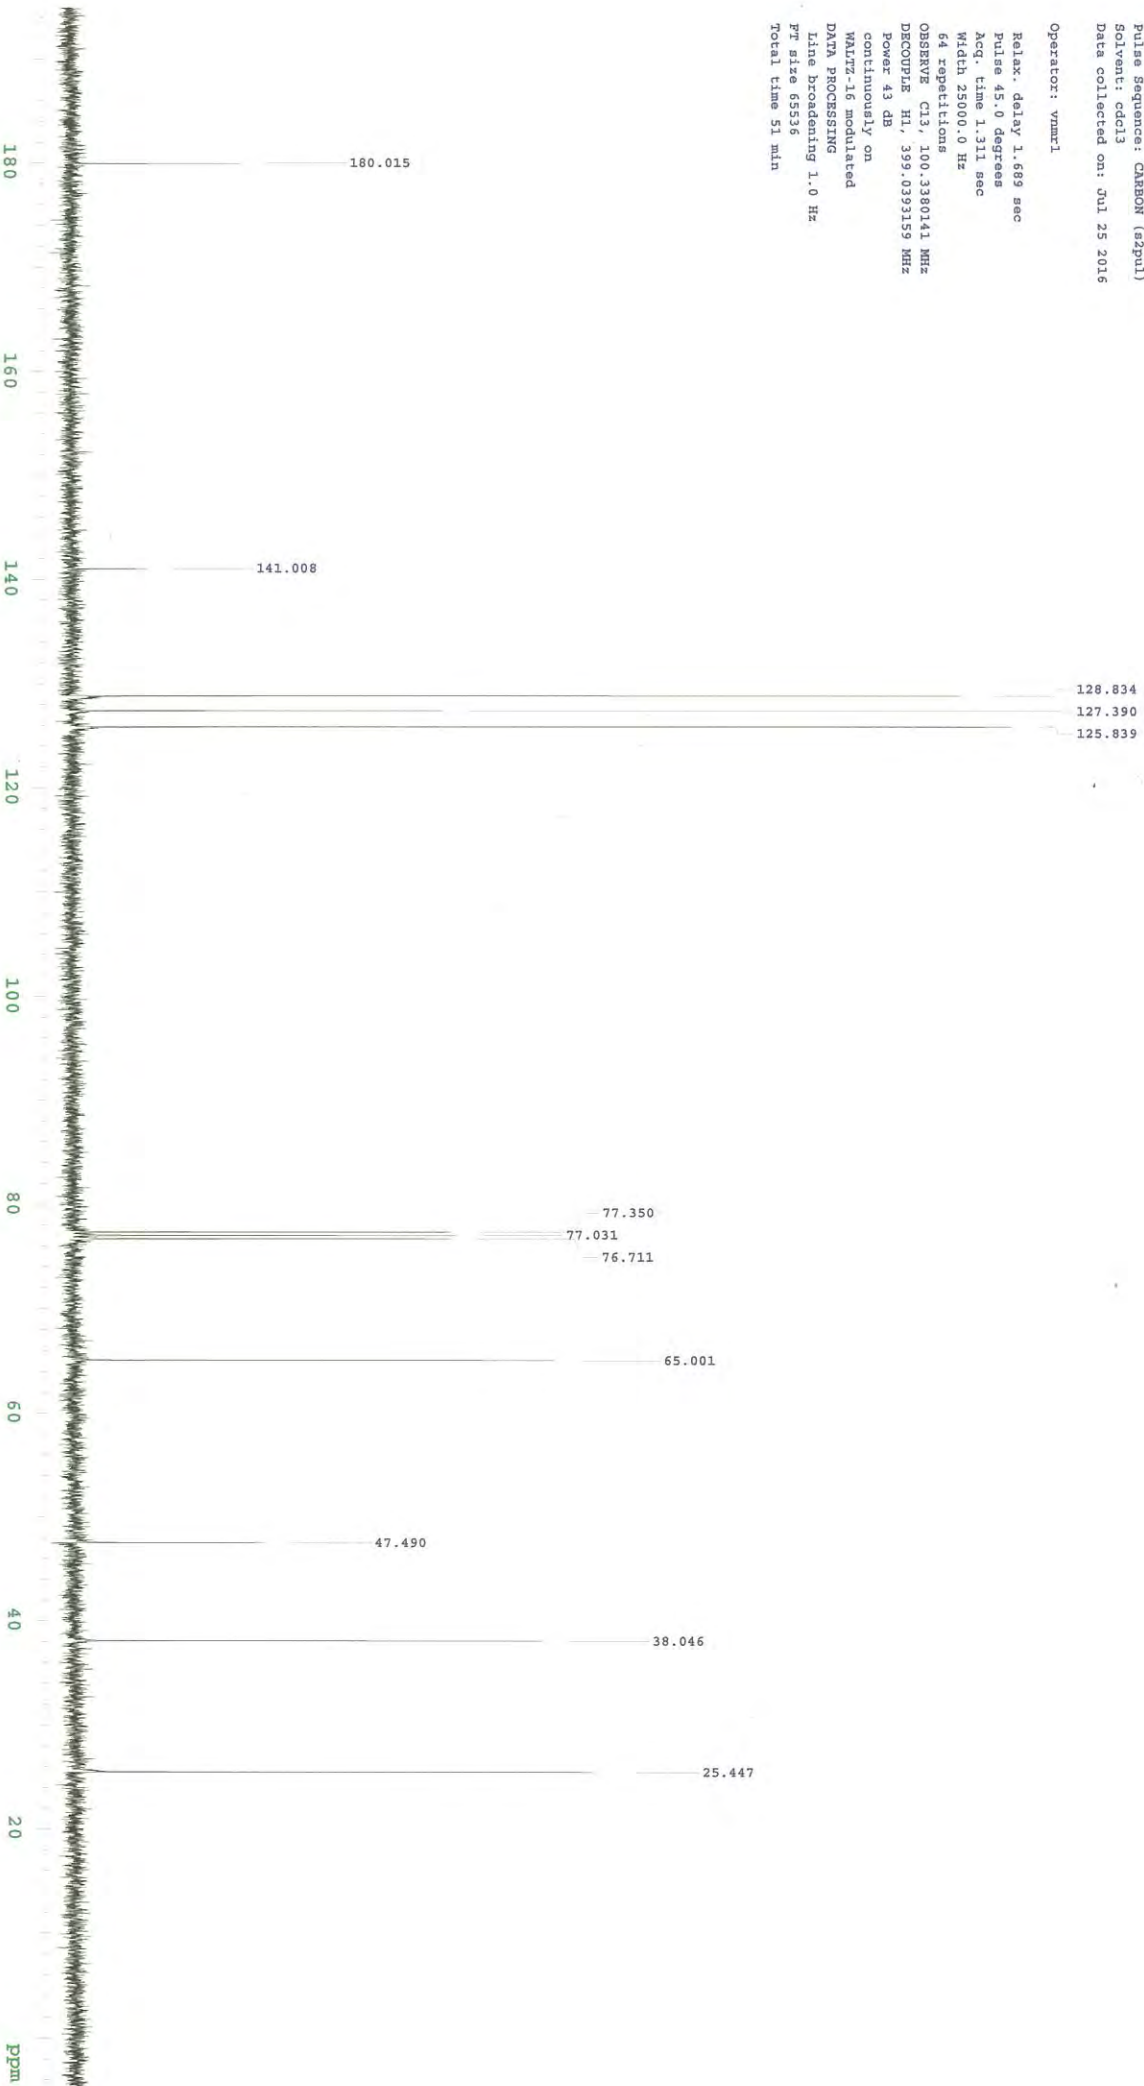

Sample Name:

Data Collected on:  
Agilent-NMR-vnmr400  
Archive directory:

Sample directory:

FidFile: PROTON

Pulse Sequence: PROTON (zgpg3)  
Solvent: cdcl3  
Data collected on: Jul 26 2016

Operator: vnmr1

Relax. delay 1.500 sec  
Pulse 45.0 degrees  
Acq. time 3.500 sec  
Width 6377.6 Hz  
8 repetitions  
OBSERVE H1, 399.0373207 MHz  
DATA PROCESSING  
Line broadening 0.2 Hz  
FT size 65536  
Total time 0 min 40 sec

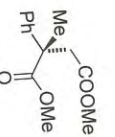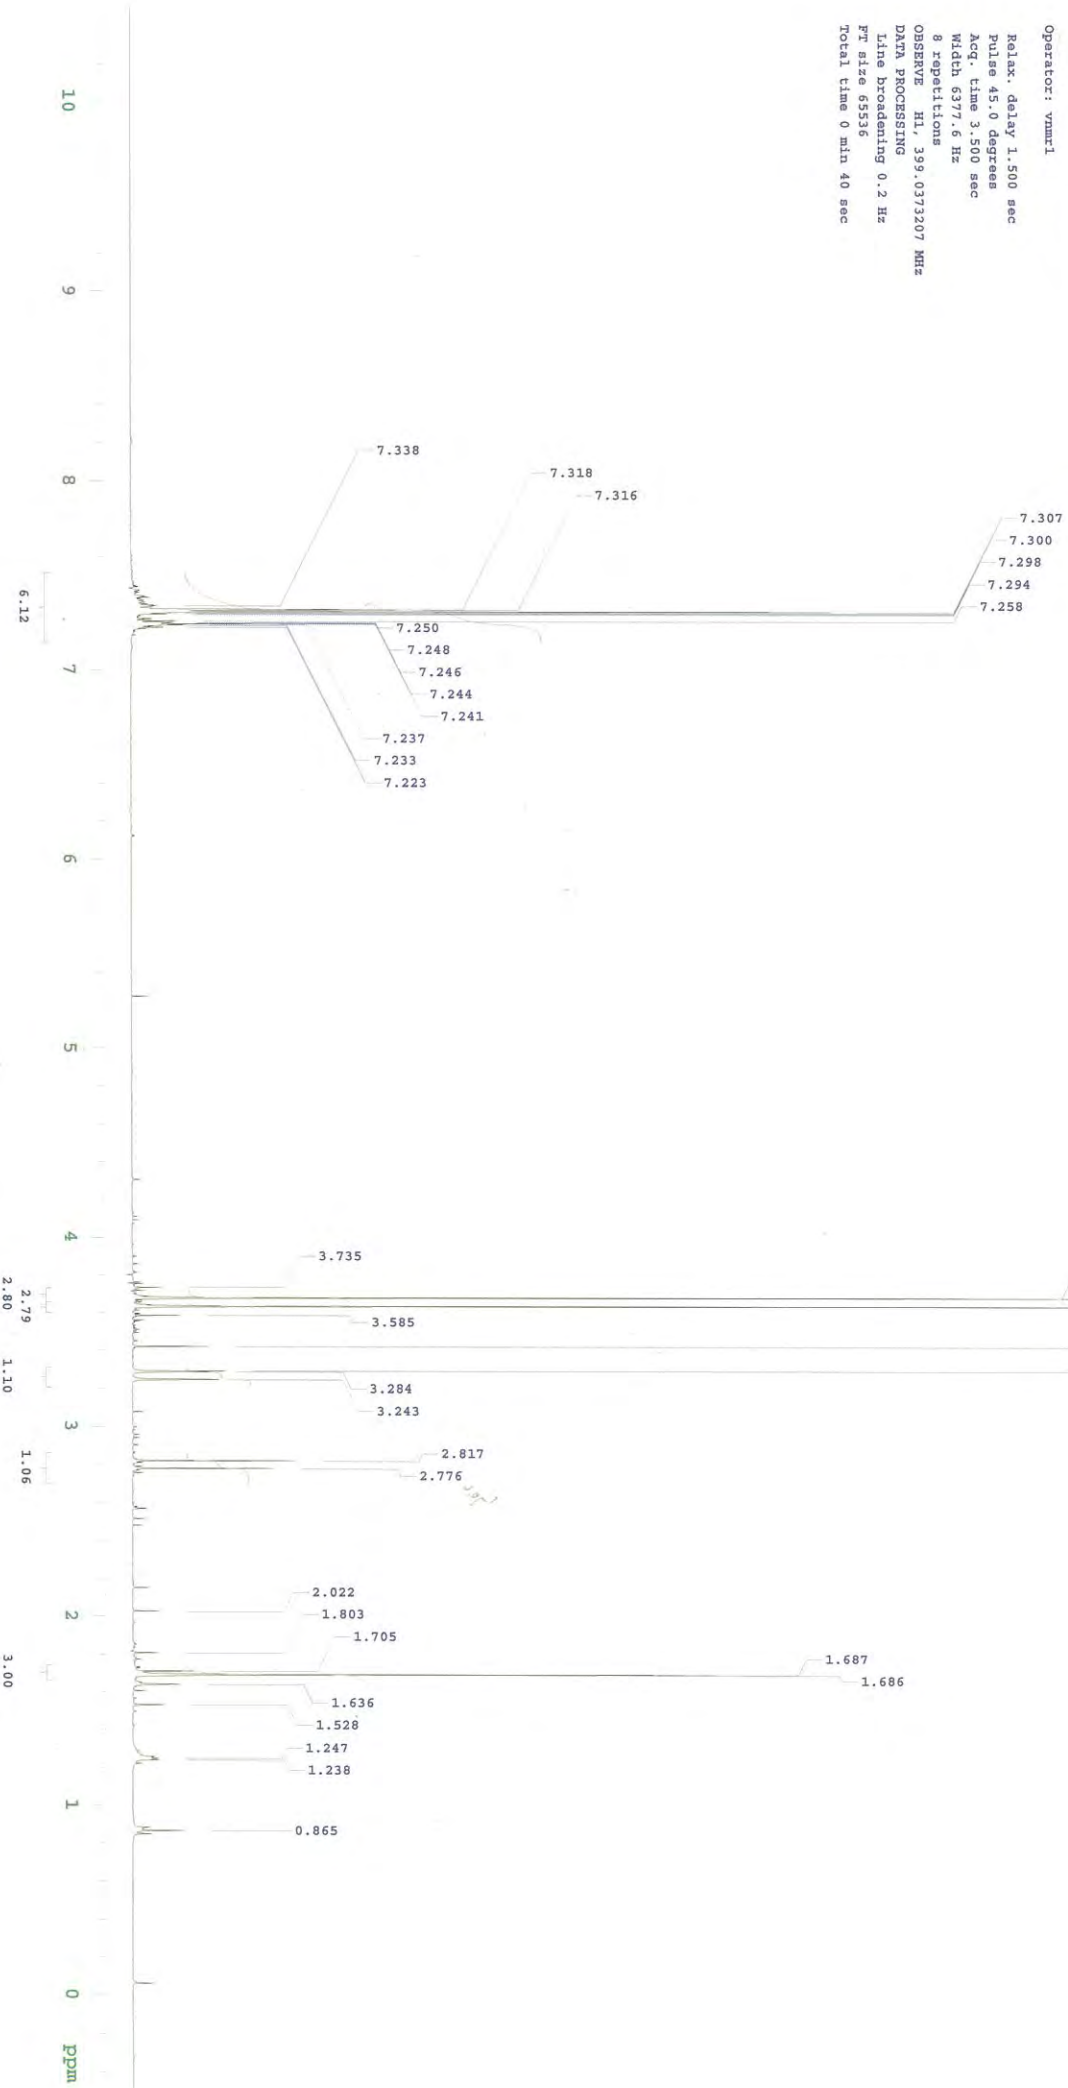

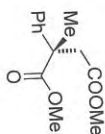

Sample Name:

Data Collected on:

Agilent-NMR-vnmr400

Archive directory:

Sample directory:

FIDFile: CARBON

Pulse Sequence: CARBON (s2pul)

Solvent: cdcl3

Data collected on: Jul 26 2016

Operator: vnmr1

Relax. delay 1.689 sec

Pulse 45.0 degrees

Acq. time 1.311 sec

Width 25000.0 Hz

64 repetitions

OBSERVE C13, 100.380141 MHz

DECOUPLE H1, 399.0393159 MHz

Power 43 dB

continuously on

WALTZ-16 modulated

DATA PROCESSING

Line broadening 1.0 Hz

FT size 65536

Total time 51 min

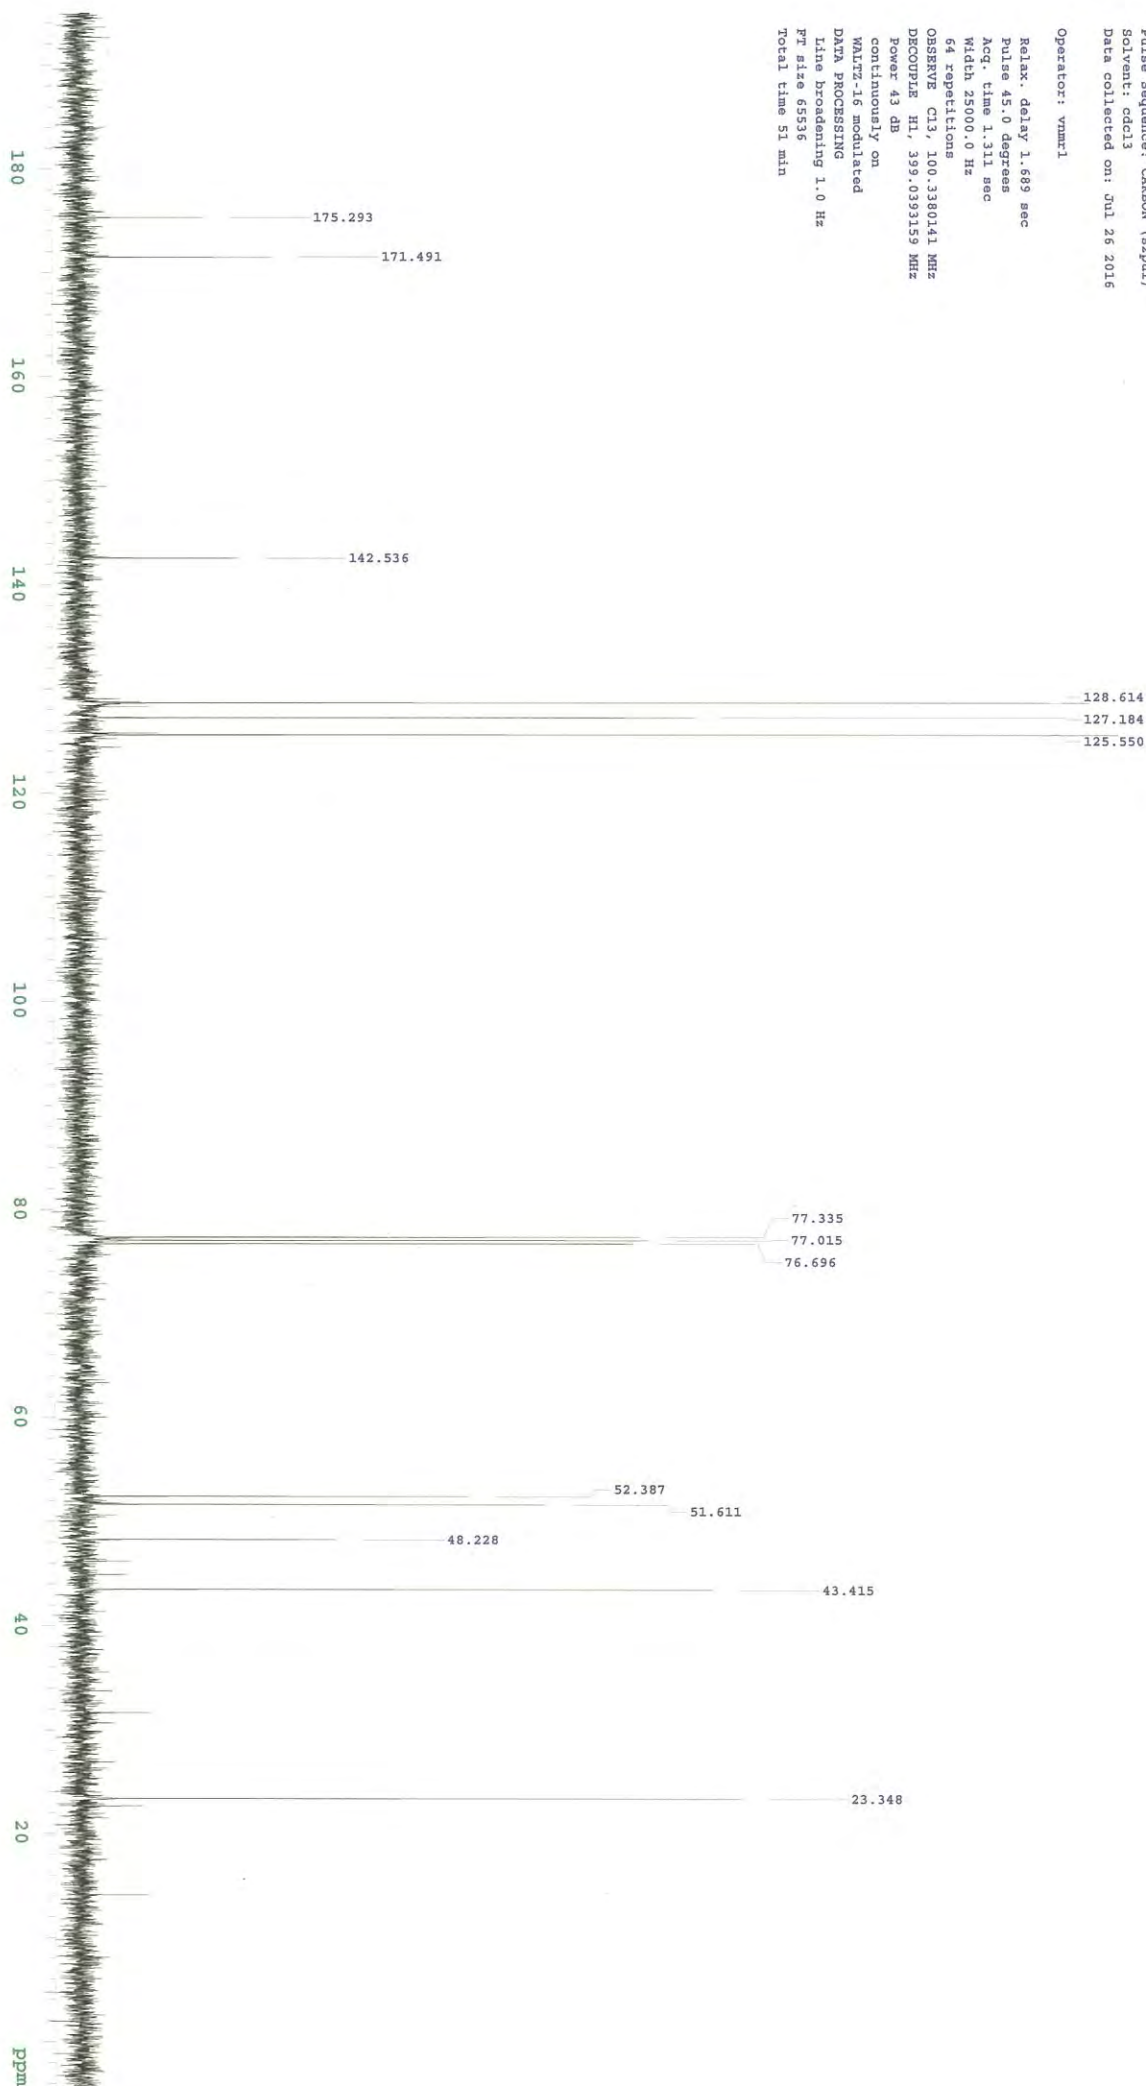

Sample Name:

Data Collected on:  
Agilent-NMR-vnmr400  
Archive directory:

Sample directory:

FIDFile: 128-chiral-13C

Pulse Sequence: CARBON (zgpg3)  
Solvent: cdcl3  
Data collected on: Mar 25 2016

Operator: vnmr1

Relax. delay 1.689 sec  
Pulse 45.0 degrees  
Acq. time 1.311 sec  
Width 25000.0 Hz  
128 repetitions  
OBSERVE C13, 100.380141 MHz  
DECOUPLE H1, 399.039159 MHz  
Power 43 dB  
continuously on  
WALTZ-16 modulated  
DATA PROCESSING  
Line broadening 1.0 Hz  
FT size 65536  
Total time 51 min

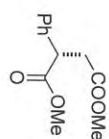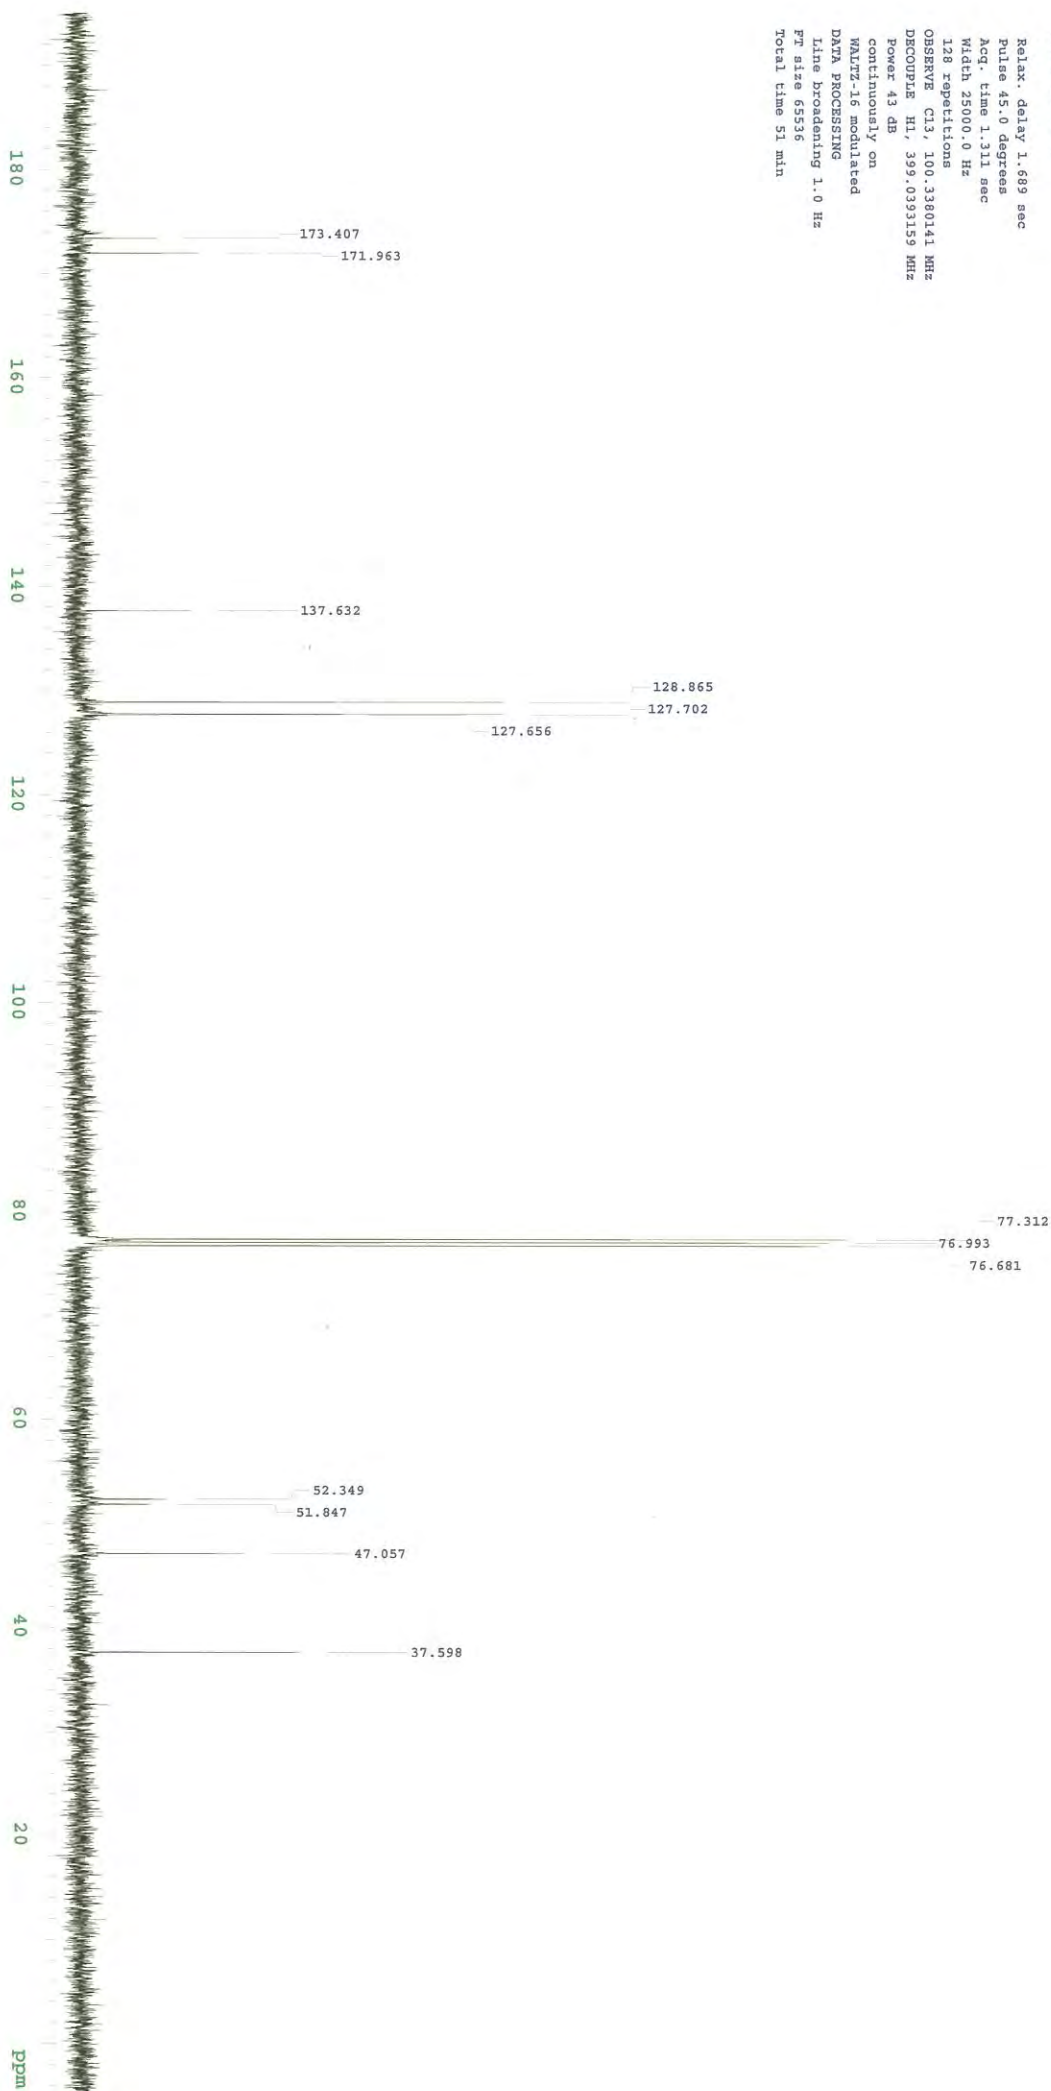

Iodoether-endo

Sample Name:

Data Collected on:

Agilent-NMR-vnmr400

Archive directory:

Sample directory:

FIDFile: PROTON

Pulse Sequence: PROTON (szpul)

Solvent: cdcl3

Data collected on: Mar 24 2016

Operator: vnmr1

Relax. delay 1.500 sec

Pulse 45.0 degrees

Acq. time 3.500 sec

Width 6377.6 Hz

8 repetitions

OBSERVE H1, 399.0373207 MHz

DATA PROCESSING

Line broadening 0.2 Hz

FT size 65536

Total time 0 min 40 sec

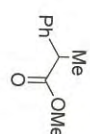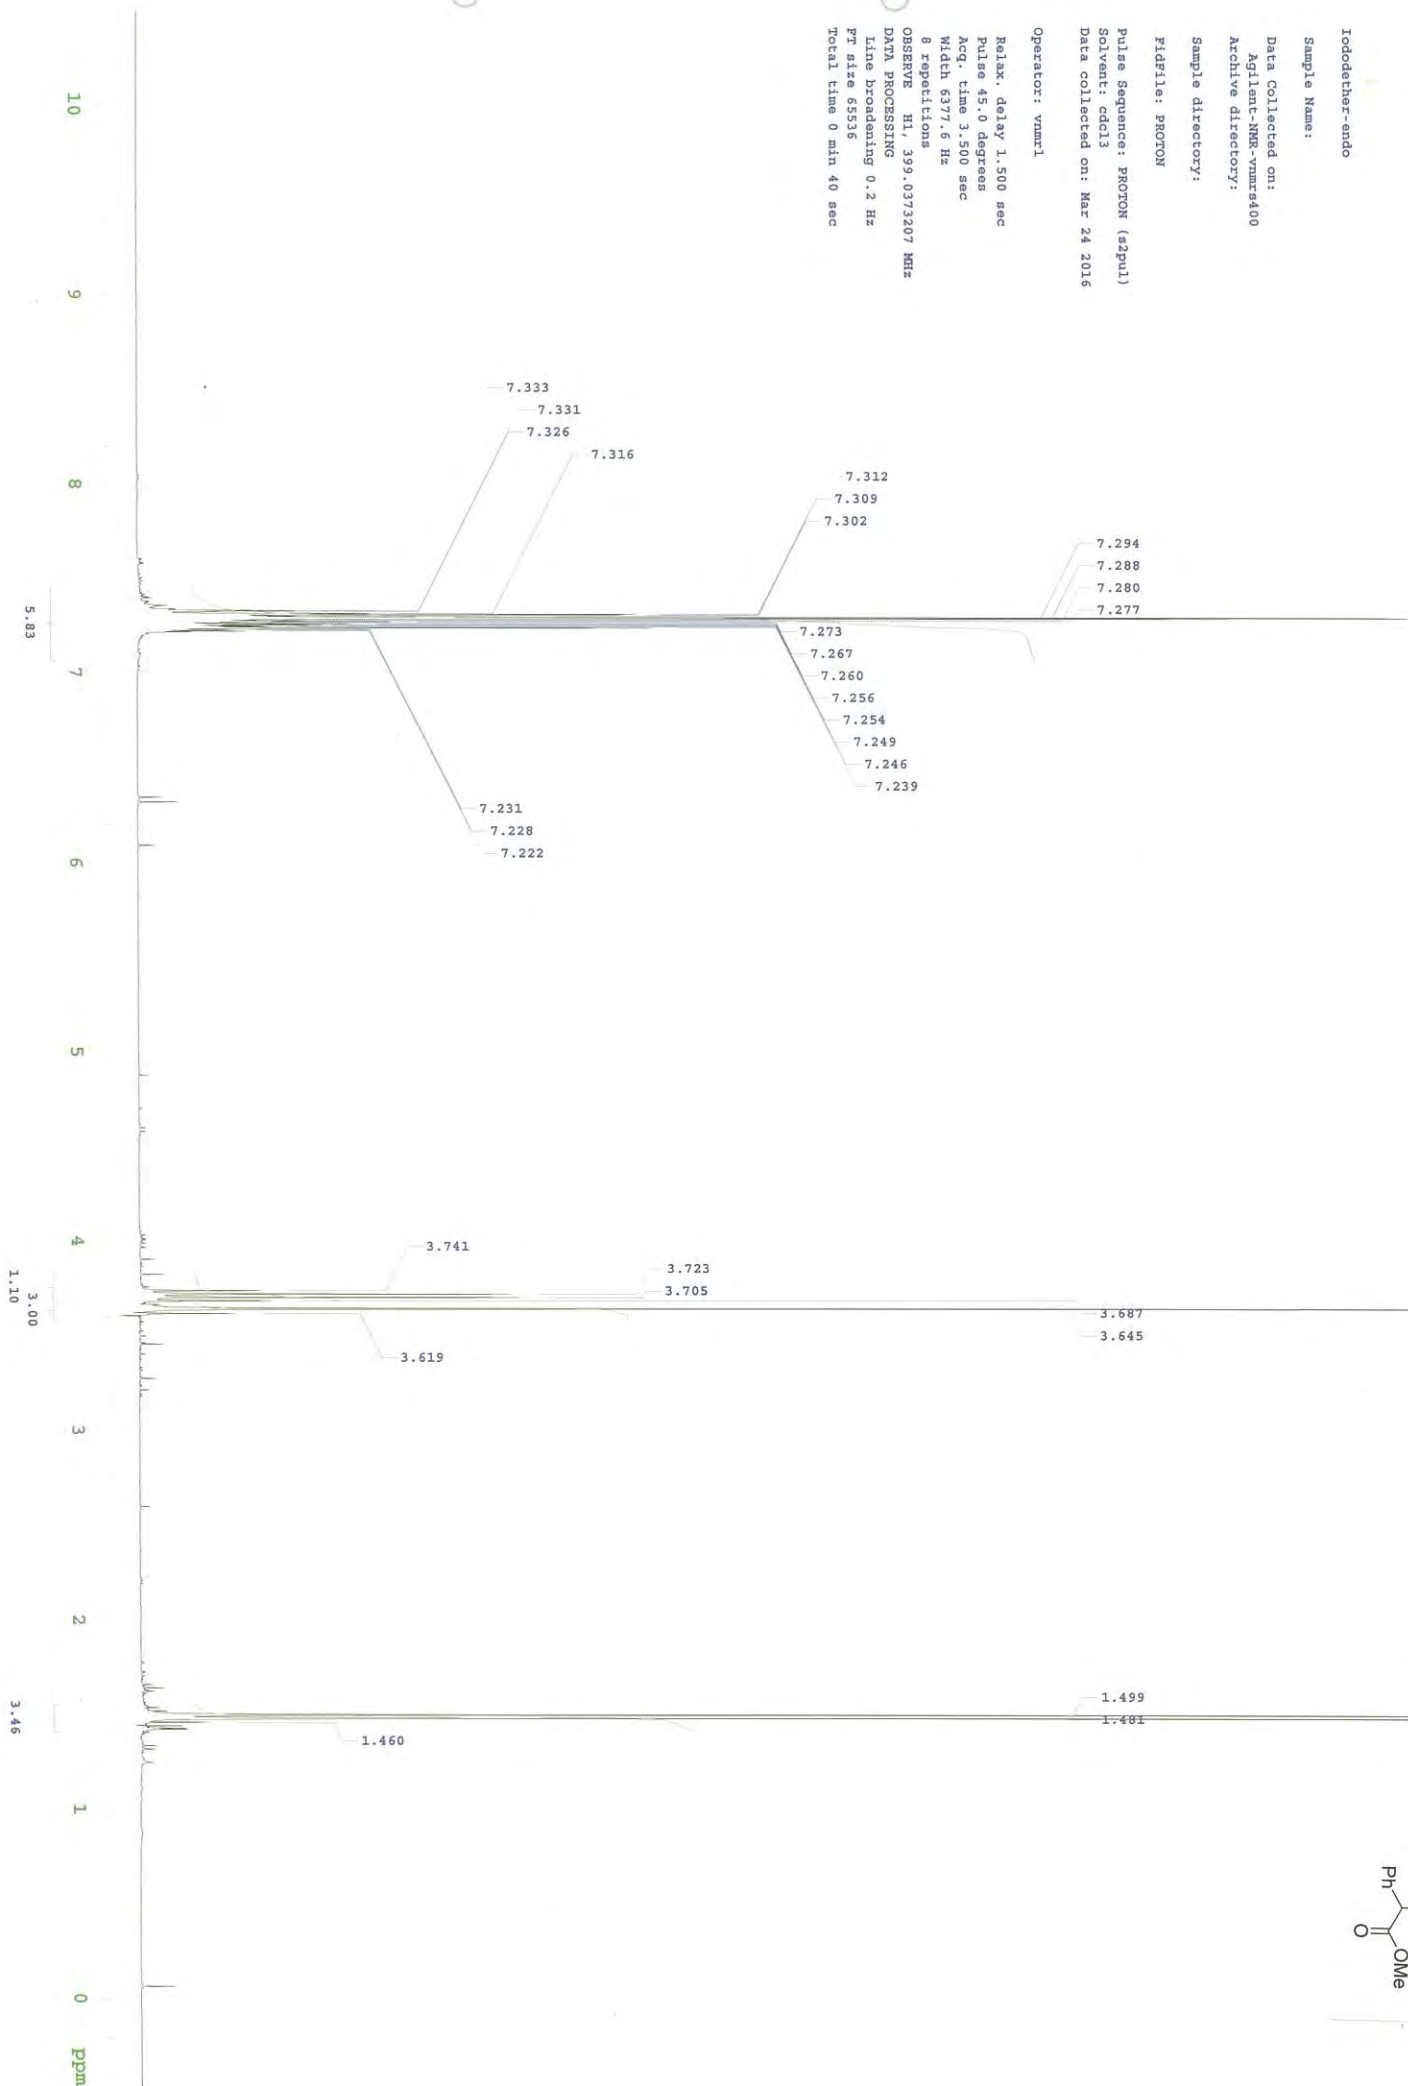



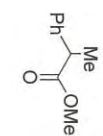

Sample Name:  
Data Collected on:  
Agilent-NMR-vnmr400  
Archive directory:

Sample directory:  
F4File: CARBON

Pulse Sequence: CARBON (szpul)  
Solvent: cdcl3  
Data collected on: Mar 24 2016

Operator: vnmr1  
Relax. delay 1.689 sec  
Pulse 45.0 degrees  
Acq. time 1.311 sec  
Width 25000.0 Hz  
64 repetitions  
OBSERVE C13, 100.3380141 MHz  
DECOUPLE H1, 399.0393159 MHz  
Power 43 dB  
continuously on  
WALTZ-16 modulated  
DATA PROCESSING  
Line broadening 1.0 Hz  
FT size 65536  
Total time 51 min

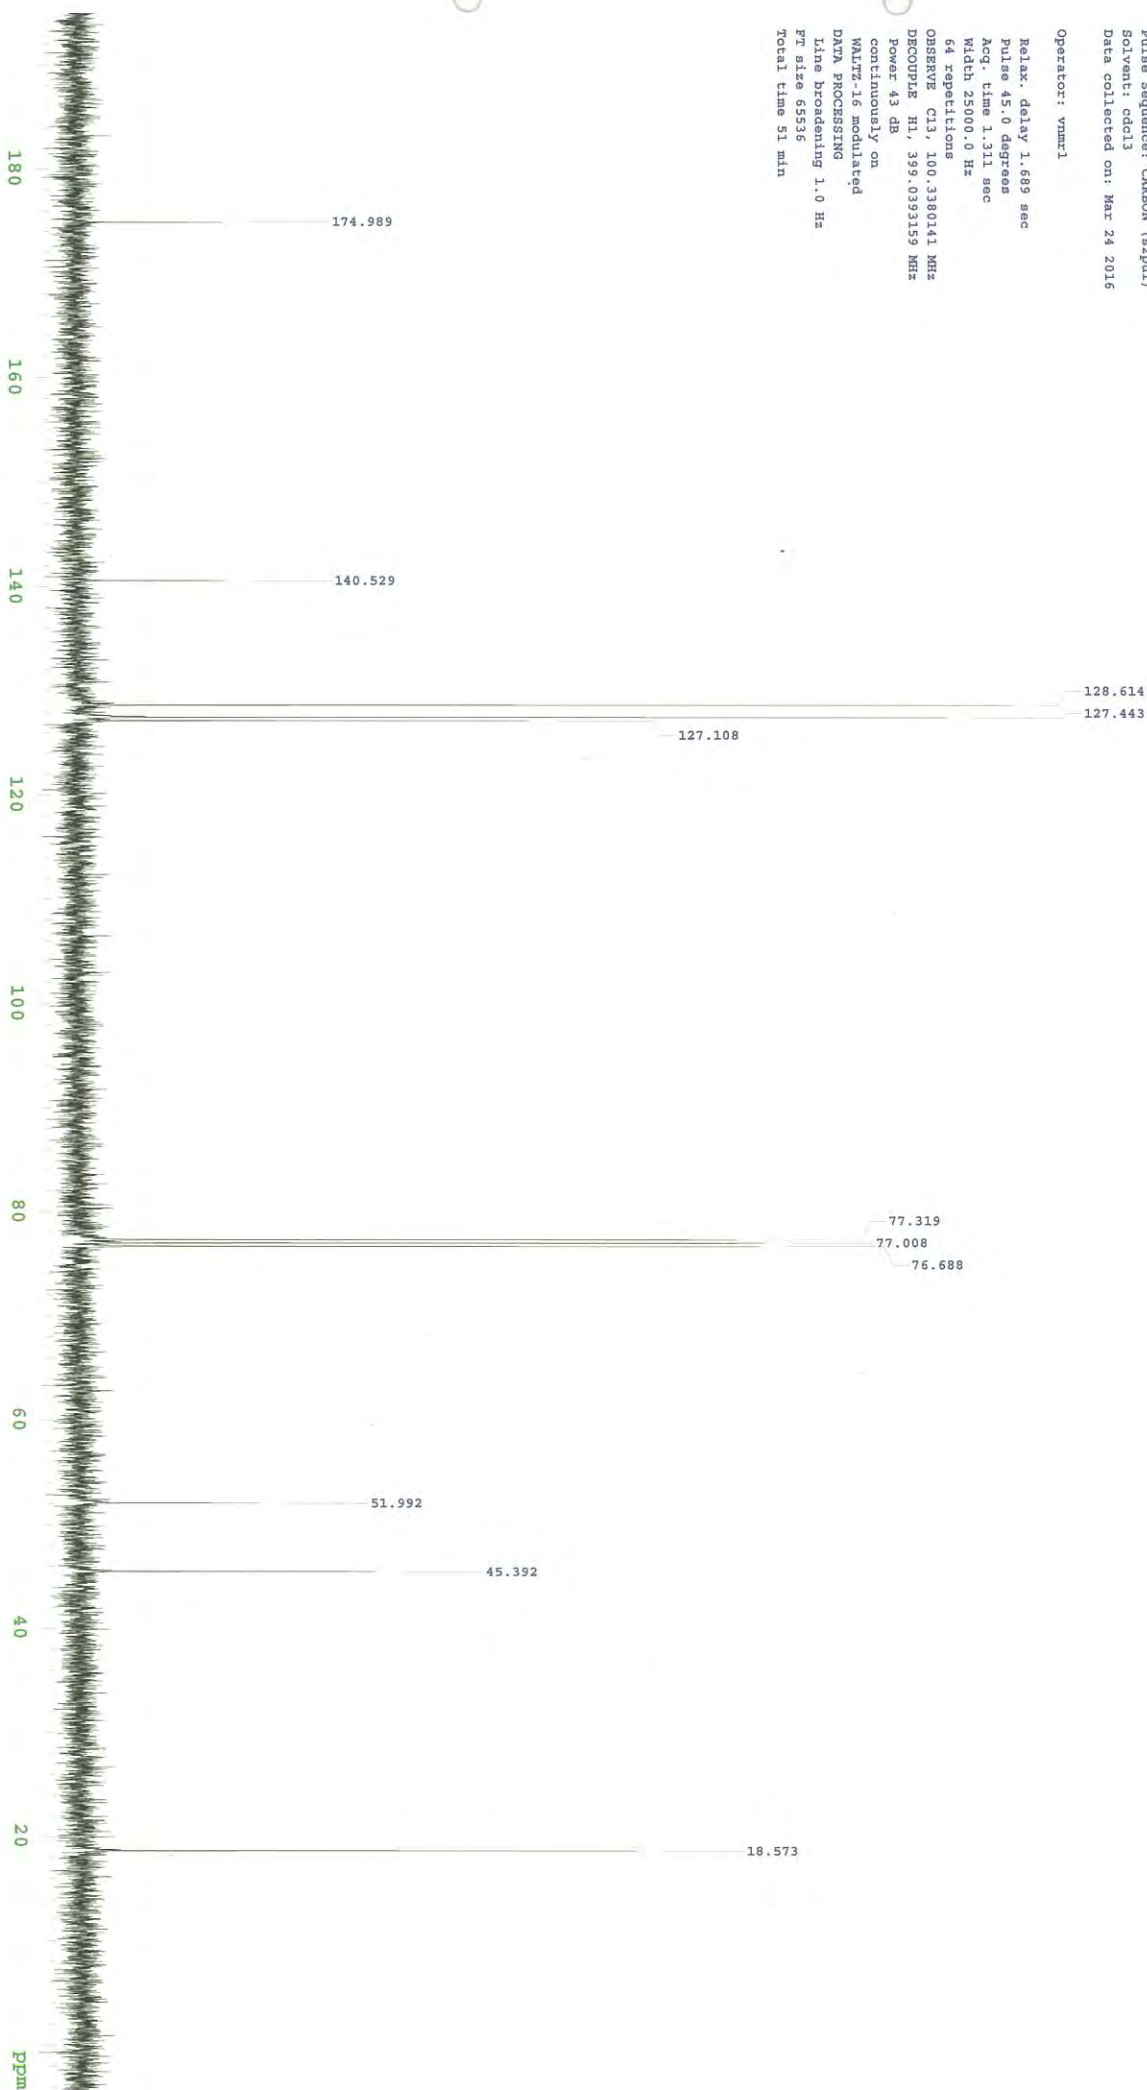

Supplement: c8cc03191f1.pdf [file c8cc03191f1.pdf]
